# Supplementary material for: Predicting Attitudes toward Press- and Speech Freedom across the U.S.A.: A Test of Climato-Economic, Parasite Stress, and Life History Theories
Source: PLoS One. 2015 Jun 1;10(6):e0125241. doi: 10.1371/journal.pone.0125241 (PMC4451980; doi:10.1371/journal.pone.0125241)
Supplement: S1 Data — (XLSX) [file pone.0125241.s001.xlsx]

## Sheet: Test 1 non stratified
case.id	state.code	state	press2free	ft.measure	c.g.total	teen.birth.total	climate	wealth	climate.x.wealth	edu.cnt	male.dummy
32	1	Alabama	2	1.27982	1.49239	0.889715	-1.23744	-1.10867	1.37191	-1.79709	1
119	1	Alabama	3	1.27982	1.49239	0.889715	-1.23744	-1.10867	1.37191	-1.79709	0
199	1	Alabama	1	1.27982	1.49239	0.889715	-1.23744	-1.10867	1.37191	-1.79709	0
200	1	Alabama	2	1.27982	1.49239	0.889715	-1.23744	-1.10867	1.37191	-1.79709	1
202	1	Alabama	2	1.27982	1.49239	0.889715	-1.23744	-1.10867	1.37191	-1.79709	1
402	1	Alabama	2	1.27982	1.49239	0.889715	-1.23744	-1.10867	1.37191	1.20291	0
404	1	Alabama	3	1.27982	1.49239	0.889715	-1.23744	-1.10867	1.37191	2.20291	1
536	1	Alabama	3	1.27982	1.49239	0.889715	-1.23744	-1.10867	1.37191	2.20291	0
556	1	Alabama	3	1.27982	1.49239	0.889715	-1.23744	-1.10867	1.37191	2.20291	1
568	1	Alabama		1.27982	1.49239	0.889715	-1.23744	-1.10867	1.37191	-1.79709	1
610	1	Alabama	3	1.27982	1.49239	0.889715	-1.23744	-1.10867	1.37191	2.20291	1
740	1	Alabama	3	1.27982	1.49239	0.889715	-1.23744	-1.10867	1.37191	0.202913	0
743	1	Alabama	2	1.27982	1.49239	0.889715	-1.23744	-1.10867	1.37191	-1.79709	0
744	1	Alabama	1	1.27982	1.49239	0.889715	-1.23744	-1.10867	1.37191	0.202913	1
746	1	Alabama	2	1.27982	1.49239	0.889715	-1.23744	-1.10867	1.37191	1.20291	0
752	1	Alabama	2	1.27982	1.49239	0.889715	-1.23744	-1.10867	1.37191	0.202913	0
853	1	Alabama	3	1.27982	1.49239	0.889715	-1.23744	-1.10867	1.37191	1.20291	1
857	1	Alabama	1	1.27982	1.49239	0.889715	-1.23744	-1.10867	1.37191	0.202913	0
859	1	Alabama	3	1.27982	1.49239	0.889715	-1.23744	-1.10867	1.37191	1.20291	1
861	1	Alabama	3	1.27982	1.49239	0.889715	-1.23744	-1.10867	1.37191	-2.79709	1
75.2006	1	Alabama	3	1.27982	1.49239	0.889715	-1.23744	-1.10867	1.37191	-1.79709	0
268.201	1	Alabama	3	1.27982	1.49239	0.889715	-1.23744	-1.10867	1.37191	-1.79709	0
112.201	1	Alabama	3	1.27982	1.49239	0.889715	-1.23744	-1.10867	1.37191	-1.79709	1
159.201	1	Alabama	2	1.27982	1.49239	0.889715	-1.23744	-1.10867	1.37191	-1.79709	0
60.2006	1	Alabama	3	1.27982	1.49239	0.889715	-1.23744	-1.10867	1.37191	-1.79709	0
413.201	1	Alabama	3	1.27982	1.49239	0.889715	-1.23744	-1.10867	1.37191	-0.797087	1
398.201	1	Alabama	3	1.27982	1.49239	0.889715	-1.23744	-1.10867	1.37191	0.202913	0
76.2006	1	Alabama	3	1.27982	1.49239	0.889715	-1.23744	-1.10867	1.37191	-0.797087	1
124.201	1	Alabama	3	1.27982	1.49239	0.889715	-1.23744	-1.10867	1.37191	1.20291	0
402.201	1	Alabama	3	1.27982	1.49239	0.889715	-1.23744	-1.10867	1.37191	1.20291	1
201.201	1	Alabama	3	1.27982	1.49239	0.889715	-1.23744	-1.10867	1.37191	1.20291	0
425.201	1	Alabama	2	1.27982	1.49239	0.889715	-1.23744	-1.10867	1.37191	1.20291	0
313.201	1	Alabama	2	1.27982	1.49239	0.889715	-1.23744	-1.10867	1.37191	1.20291	0
26.2006	1	Alabama	2	1.27982	1.49239	0.889715	-1.23744	-1.10867	1.37191	2.20291	0
97.2006	1	Alabama	3	1.27982	1.49239	0.889715	-1.23744	-1.10867	1.37191	2.20291	0
216	3	Arizona	2	0.0705427	-0.00155354	1.56625	-0.576004	-0.267169	0.15389	-0.797087	0
225	3	Arizona	3	0.0705427	-0.00155354	1.56625	-0.576004	-0.267169	0.15389	-1.79709	1
229	3	Arizona	2	0.0705427	-0.00155354	1.56625	-0.576004	-0.267169	0.15389	1.20291	0
233	3	Arizona	3	0.0705427	-0.00155354	1.56625	-0.576004	-0.267169	0.15389	0.202913	0
356	3	Arizona	3	0.0705427	-0.00155354	1.56625	-0.576004	-0.267169	0.15389	-2.79709	1
413	3	Arizona	3	0.0705427	-0.00155354	1.56625	-0.576004	-0.267169	0.15389	1.20291	0
757	3	Arizona	3	0.0705427	-0.00155354	1.56625	-0.576004	-0.267169	0.15389	2.20291	0
759	3	Arizona	2	0.0705427	-0.00155354	1.56625	-0.576004	-0.267169	0.15389	1.20291	0
880	3	Arizona	2	0.0705427	-0.00155354	1.56625	-0.576004	-0.267169	0.15389	2.20291	0
881	3	Arizona	2	0.0705427	-0.00155354	1.56625	-0.576004	-0.267169	0.15389	1.20291	1
798.201	3	Arizona	2	0.0705427	-0.00155354	1.56625	-0.576004	-0.267169	0.15389	-1.79709	0
802.201	3	Arizona	1	0.0705427	-0.00155354	1.56625	-0.576004	-0.267169	0.15389	-1.79709	1
791.201	3	Arizona	2	0.0705427	-0.00155354	1.56625	-0.576004	-0.267169	0.15389	-1.79709	1
805.201	3	Arizona	3	0.0705427	-0.00155354	1.56625	-0.576004	-0.267169	0.15389	-1.79709	0
820.201	3	Arizona	3	0.0705427	-0.00155354	1.56625	-0.576004	-0.267169	0.15389	-1.79709	0
830.201	3	Arizona	3	0.0705427	-0.00155354	1.56625	-0.576004	-0.267169	0.15389	-1.79709	0
853.201	3	Arizona	2	0.0705427	-0.00155354	1.56625	-0.576004	-0.267169	0.15389	-1.79709	1
11.2006	3	Arizona	2	0.0705427	-0.00155354	1.56625	-0.576004	-0.267169	0.15389	-2.79709	0
857.201	3	Arizona	2	0.0705427	-0.00155354	1.56625	-0.576004	-0.267169	0.15389	-1.79709	1
810.201	3	Arizona	2	0.0705427	-0.00155354	1.56625	-0.576004	-0.267169	0.15389	-1.79709	1
822.201	3	Arizona	3	0.0705427	-0.00155354	1.56625	-0.576004	-0.267169	0.15389	-1.79709	1
876.201	3	Arizona	3	0.0705427	-0.00155354	1.56625	-0.576004	-0.267169	0.15389	-1.79709	0
837.201	3	Arizona	2	0.0705427	-0.00155354	1.56625	-0.576004	-0.267169	0.15389	0.202913	0
814.201	3	Arizona	2	0.0705427	-0.00155354	1.56625	-0.576004	-0.267169	0.15389	0.202913	0
865.201	3	Arizona	2	0.0705427	-0.00155354	1.56625	-0.576004	-0.267169	0.15389	0.202913	1
848.201	3	Arizona	2	0.0705427	-0.00155354	1.56625	-0.576004	-0.267169	0.15389	1.20291	0
829.201	3	Arizona	3	0.0705427	-0.00155354	1.56625	-0.576004	-0.267169	0.15389	1.20291	0
839.201	3	Arizona	2	0.0705427	-0.00155354	1.56625	-0.576004	-0.267169	0.15389	1.20291	0
793.201	3	Arizona	3	0.0705427	-0.00155354	1.56625	-0.576004	-0.267169	0.15389	1.20291	0
821.201	3	Arizona	2	0.0705427	-0.00155354	1.56625	-0.576004	-0.267169	0.15389	1.20291	0
868.201	3	Arizona	3	0.0705427	-0.00155354	1.56625	-0.576004	-0.267169	0.15389	1.20291	0
856.201	3	Arizona	1	0.0705427	-0.00155354	1.56625	-0.576004	-0.267169	0.15389	2.20291	0
833.201	3	Arizona	2	0.0705427	-0.00155354	1.56625	-0.576004	-0.267169	0.15389	2.20291	0
794.201	3	Arizona	3	0.0705427	-0.00155354	1.56625	-0.576004	-0.267169	0.15389	2.20291	1
841.201	3	Arizona	2	0.0705427	-0.00155354	1.56625	-0.576004	-0.267169	0.15389	2.20291	0
223	2	Arkansas	3	0.530029	0.498012	1.65082	-0.369304	-1.31175	0.484433	0.202913	1
224	2	Arkansas	3	0.530029	0.498012	1.65082	-0.369304	-1.31175	0.484433	-1.79709	1
231	2	Arkansas	1	0.530029	0.498012	1.65082	-0.369304	-1.31175	0.484433	-3.79709	1
236	2	Arkansas	3	0.530029	0.498012	1.65082	-0.369304	-1.31175	0.484433	-1.79709	1
344	2	Arkansas	3	0.530029	0.498012	1.65082	-0.369304	-1.31175	0.484433	-3.79709	1
395	2	Arkansas	2	0.530029	0.498012	1.65082	-0.369304	-1.31175	0.484433	2.20291	0
396	2	Arkansas	3	0.530029	0.498012	1.65082	-0.369304	-1.31175	0.484433	-1.79709	0
401	2	Arkansas	2	0.530029	0.498012	1.65082	-0.369304	-1.31175	0.484433	1.20291	0
498	2	Arkansas	3	0.530029	0.498012	1.65082	-0.369304	-1.31175	0.484433	0.202913	1
516	2	Arkansas	3	0.530029	0.498012	1.65082	-0.369304	-1.31175	0.484433	1.20291	1
749	2	Arkansas	3	0.530029	0.498012	1.65082	-0.369304	-1.31175	0.484433	1.20291	0
875	2	Arkansas	2	0.530029	0.498012	1.65082	-0.369304	-1.31175	0.484433	2.20291	1
998	2	Arkansas	3	0.530029	0.498012	1.65082	-0.369304	-1.31175	0.484433		0
146.201	2	Arkansas	2	0.530029	0.498012	1.65082	-0.369304	-1.31175	0.484433	-1.79709	1
202.201	2	Arkansas	2	0.530029	0.498012	1.65082	-0.369304	-1.31175	0.484433	-1.79709	0
207.201	2	Arkansas	2	0.530029	0.498012	1.65082	-0.369304	-1.31175	0.484433	-2.79709	1
85.2006	2	Arkansas	2	0.530029	0.498012	1.65082	-0.369304	-1.31175	0.484433	-1.79709	1
115.201	2	Arkansas	3	0.530029	0.498012	1.65082	-0.369304	-1.31175	0.484433	-1.79709	1
169.201	2	Arkansas	3	0.530029	0.498012	1.65082	-0.369304	-1.31175	0.484433	-1.79709	1
406.201	2	Arkansas	3	0.530029	0.498012	1.65082	-0.369304	-1.31175	0.484433	-2.79709	1
321.201	2	Arkansas	2	0.530029	0.498012	1.65082	-0.369304	-1.31175	0.484433	0.202913	0
91.2006	2	Arkansas	2	0.530029	0.498012	1.65082	-0.369304	-1.31175	0.484433	0.202913	0
330.201	2	Arkansas	3	0.530029	0.498012	1.65082	-0.369304	-1.31175	0.484433	0.202913	1
373.201	2	Arkansas	2	0.530029	0.498012	1.65082	-0.369304	-1.31175	0.484433	1.20291	0
171.201	2	Arkansas	3	0.530029	0.498012	1.65082	-0.369304	-1.31175	0.484433	1.20291	1
211.201	2	Arkansas	3	0.530029	0.498012	1.65082	-0.369304	-1.31175	0.484433	1.20291	0
92.2006	2	Arkansas	2	0.530029	0.498012	1.65082	-0.369304	-1.31175	0.484433	1.20291	0
283.201	2	Arkansas	2	0.530029	0.498012	1.65082	-0.369304	-1.31175	0.484433	2.20291	0
53	4	California	1	0.0140369	0.0382082	-0.0405217	-1.34079	0.951322	-1.27553	1.20291	0
54	4	California	2	0.0140369	0.0382082	-0.0405217	-1.34079	0.951322	-1.27553	1.20291	0
55	4	California	2	0.0140369	0.0382082	-0.0405217	-1.34079	0.951322	-1.27553	-0.797087	1
56	4	California	2	0.0140369	0.0382082	-0.0405217	-1.34079	0.951322	-1.27553	2.20291	0
57	4	California	2	0.0140369	0.0382082	-0.0405217	-1.34079	0.951322	-1.27553	1.20291	0
58	4	California	2	0.0140369	0.0382082	-0.0405217	-1.34079	0.951322	-1.27553	-1.79709	1
59	4	California	2	0.0140369	0.0382082	-0.0405217	-1.34079	0.951322	-1.27553	1.20291	0
60	4	California	3	0.0140369	0.0382082	-0.0405217	-1.34079	0.951322	-1.27553	-2.79709	0
62	4	California	2	0.0140369	0.0382082	-0.0405217	-1.34079	0.951322	-1.27553	1.20291	1
241	4	California	2	0.0140369	0.0382082	-0.0405217	-1.34079	0.951322	-1.27553	2.20291	0
242	4	California	3	0.0140369	0.0382082	-0.0405217	-1.34079	0.951322	-1.27553	1.20291	0
243	4	California	2	0.0140369	0.0382082	-0.0405217	-1.34079	0.951322	-1.27553	1.20291	0
244	4	California	3	0.0140369	0.0382082	-0.0405217	-1.34079	0.951322	-1.27553	1.20291	1
245	4	California	2	0.0140369	0.0382082	-0.0405217	-1.34079	0.951322	-1.27553	2.20291	0
247	4	California	2	0.0140369	0.0382082	-0.0405217	-1.34079	0.951322	-1.27553	0.202913	0
249	4	California	1	0.0140369	0.0382082	-0.0405217	-1.34079	0.951322	-1.27553	2.20291	0
250	4	California	3	0.0140369	0.0382082	-0.0405217	-1.34079	0.951322	-1.27553	0.202913	1
251	4	California	2	0.0140369	0.0382082	-0.0405217	-1.34079	0.951322	-1.27553	0.202913	0
254	4	California		0.0140369	0.0382082	-0.0405217	-1.34079	0.951322	-1.27553	1.20291	0
255	4	California	2	0.0140369	0.0382082	-0.0405217	-1.34079	0.951322	-1.27553	0.202913	0
256	4	California	3	0.0140369	0.0382082	-0.0405217	-1.34079	0.951322	-1.27553	-1.79709	1
257	4	California	3	0.0140369	0.0382082	-0.0405217	-1.34079	0.951322	-1.27553	-2.79709	0
260	4	California	3	0.0140369	0.0382082	-0.0405217	-1.34079	0.951322	-1.27553	1.20291	0
261	4	California	3	0.0140369	0.0382082	-0.0405217	-1.34079	0.951322	-1.27553	2.20291	0
262	4	California		0.0140369	0.0382082	-0.0405217	-1.34079	0.951322	-1.27553	0.202913	1
264	4	California	2	0.0140369	0.0382082	-0.0405217	-1.34079	0.951322	-1.27553	-1.79709	0
265	4	California	3	0.0140369	0.0382082	-0.0405217	-1.34079	0.951322	-1.27553	0.202913	1
266	4	California	3	0.0140369	0.0382082	-0.0405217	-1.34079	0.951322	-1.27553	-2.79709	0
267	4	California	2	0.0140369	0.0382082	-0.0405217	-1.34079	0.951322	-1.27553	2.20291	0
360	4	California	2	0.0140369	0.0382082	-0.0405217	-1.34079	0.951322	-1.27553	1.20291	0
363	4	California	1	0.0140369	0.0382082	-0.0405217	-1.34079	0.951322	-1.27553	0.202913	0
364	4	California	1	0.0140369	0.0382082	-0.0405217	-1.34079	0.951322	-1.27553	0.202913	0
366	4	California	3	0.0140369	0.0382082	-0.0405217	-1.34079	0.951322	-1.27553	2.20291	0
371	4	California	2	0.0140369	0.0382082	-0.0405217	-1.34079	0.951322	-1.27553	2.20291	0
374	4	California	2	0.0140369	0.0382082	-0.0405217	-1.34079	0.951322	-1.27553	-3.79709	1
445	4	California	3	0.0140369	0.0382082	-0.0405217	-1.34079	0.951322	-1.27553	-1.79709	1
447	4	California	2	0.0140369	0.0382082	-0.0405217	-1.34079	0.951322	-1.27553	0.202913	1
449	4	California	3	0.0140369	0.0382082	-0.0405217	-1.34079	0.951322	-1.27553	0.202913	1
452	4	California	3	0.0140369	0.0382082	-0.0405217	-1.34079	0.951322	-1.27553	-1.79709	1
455	4	California	2	0.0140369	0.0382082	-0.0405217	-1.34079	0.951322	-1.27553	-1.79709	0
470	4	California	2	0.0140369	0.0382082	-0.0405217	-1.34079	0.951322	-1.27553	0.202913	1
474	4	California	2	0.0140369	0.0382082	-0.0405217	-1.34079	0.951322	-1.27553	2.20291	0
476	4	California	2	0.0140369	0.0382082	-0.0405217	-1.34079	0.951322	-1.27553	1.20291	0
482	4	California	3	0.0140369	0.0382082	-0.0405217	-1.34079	0.951322	-1.27553	-2.79709	1
485	4	California	2	0.0140369	0.0382082	-0.0405217	-1.34079	0.951322	-1.27553	2.20291	0
486	4	California	2	0.0140369	0.0382082	-0.0405217	-1.34079	0.951322	-1.27553	2.20291	1
495	4	California	2	0.0140369	0.0382082	-0.0405217	-1.34079	0.951322	-1.27553	2.20291	0
504	4	California	3	0.0140369	0.0382082	-0.0405217	-1.34079	0.951322	-1.27553	-1.79709	0
509	4	California	1	0.0140369	0.0382082	-0.0405217	-1.34079	0.951322	-1.27553	0.202913	0
511	4	California	2	0.0140369	0.0382082	-0.0405217	-1.34079	0.951322	-1.27553	1.20291	0
512	4	California	3	0.0140369	0.0382082	-0.0405217	-1.34079	0.951322	-1.27553	1.20291	1
513	4	California	3	0.0140369	0.0382082	-0.0405217	-1.34079	0.951322	-1.27553	0.202913	1
515	4	California	3	0.0140369	0.0382082	-0.0405217	-1.34079	0.951322	-1.27553	-0.797087	1
518	4	California	2	0.0140369	0.0382082	-0.0405217	-1.34079	0.951322	-1.27553	0.202913	1
520	4	California	3	0.0140369	0.0382082	-0.0405217	-1.34079	0.951322	-1.27553	-0.797087	1
523	4	California	2	0.0140369	0.0382082	-0.0405217	-1.34079	0.951322	-1.27553	1.20291	1
524	4	California	3	0.0140369	0.0382082	-0.0405217	-1.34079	0.951322	-1.27553	-1.79709	1
527	4	California	2	0.0140369	0.0382082	-0.0405217	-1.34079	0.951322	-1.27553	1.20291	1
529	4	California	3	0.0140369	0.0382082	-0.0405217	-1.34079	0.951322	-1.27553	1.20291	0
530	4	California	2	0.0140369	0.0382082	-0.0405217	-1.34079	0.951322	-1.27553	0.202913	1
532	4	California	1	0.0140369	0.0382082	-0.0405217	-1.34079	0.951322	-1.27553	1.20291	1
533	4	California	3	0.0140369	0.0382082	-0.0405217	-1.34079	0.951322	-1.27553	1.20291	1
545	4	California	1	0.0140369	0.0382082	-0.0405217	-1.34079	0.951322	-1.27553	1.20291	1
548	4	California	1	0.0140369	0.0382082	-0.0405217	-1.34079	0.951322	-1.27553	2.20291	1
553	4	California	1	0.0140369	0.0382082	-0.0405217	-1.34079	0.951322	-1.27553	0.202913	1
555	4	California	2	0.0140369	0.0382082	-0.0405217	-1.34079	0.951322	-1.27553	-1.79709	1
559	4	California		0.0140369	0.0382082	-0.0405217	-1.34079	0.951322	-1.27553	0.202913	0
564	4	California	1	0.0140369	0.0382082	-0.0405217	-1.34079	0.951322	-1.27553	1.20291	1
569	4	California	2	0.0140369	0.0382082	-0.0405217	-1.34079	0.951322	-1.27553	0.202913	1
614	4	California	3	0.0140369	0.0382082	-0.0405217	-1.34079	0.951322	-1.27553	2.20291	1
620	4	California	2	0.0140369	0.0382082	-0.0405217	-1.34079	0.951322	-1.27553	0.202913	0
623	4	California	2	0.0140369	0.0382082	-0.0405217	-1.34079	0.951322	-1.27553	2.20291	1
624	4	California	3	0.0140369	0.0382082	-0.0405217	-1.34079	0.951322	-1.27553	0.202913	1
628	4	California	1	0.0140369	0.0382082	-0.0405217	-1.34079	0.951322	-1.27553	0.202913	1
630	4	California	2	0.0140369	0.0382082	-0.0405217	-1.34079	0.951322	-1.27553	0.202913	0
632	4	California	2	0.0140369	0.0382082	-0.0405217	-1.34079	0.951322	-1.27553	-1.79709	0
634	4	California	3	0.0140369	0.0382082	-0.0405217	-1.34079	0.951322	-1.27553	2.20291	0
637	4	California	3	0.0140369	0.0382082	-0.0405217	-1.34079	0.951322	-1.27553	-1.79709	0
638	4	California	2	0.0140369	0.0382082	-0.0405217	-1.34079	0.951322	-1.27553	2.20291	0
639	4	California	3	0.0140369	0.0382082	-0.0405217	-1.34079	0.951322	-1.27553	0.202913	1
657	4	California	3	0.0140369	0.0382082	-0.0405217	-1.34079	0.951322	-1.27553	0.202913	0
761	4	California	3	0.0140369	0.0382082	-0.0405217	-1.34079	0.951322	-1.27553	0.202913	0
763	4	California	2	0.0140369	0.0382082	-0.0405217	-1.34079	0.951322	-1.27553	2.20291	1
764	4	California	2	0.0140369	0.0382082	-0.0405217	-1.34079	0.951322	-1.27553	2.20291	0
889	4	California	2	0.0140369	0.0382082	-0.0405217	-1.34079	0.951322	-1.27553	0.202913	1
890	4	California	1	0.0140369	0.0382082	-0.0405217	-1.34079	0.951322	-1.27553	-1.79709	0
891	4	California	3	0.0140369	0.0382082	-0.0405217	-1.34079	0.951322	-1.27553	0.202913	1
892	4	California	2	0.0140369	0.0382082	-0.0405217	-1.34079	0.951322	-1.27553	2.20291	1
893	4	California	2	0.0140369	0.0382082	-0.0405217	-1.34079	0.951322	-1.27553	-1.79709	1
897	4	California	2	0.0140369	0.0382082	-0.0405217	-1.34079	0.951322	-1.27553	2.20291	1
898	4	California	3	0.0140369	0.0382082	-0.0405217	-1.34079	0.951322	-1.27553	-0.797087	1
899	4	California		0.0140369	0.0382082	-0.0405217	-1.34079	0.951322	-1.27553	1.20291	1
901	4	California	2	0.0140369	0.0382082	-0.0405217	-1.34079	0.951322	-1.27553	1.20291	0
902	4	California	3	0.0140369	0.0382082	-0.0405217	-1.34079	0.951322	-1.27553	1.20291	0
903	4	California	2	0.0140369	0.0382082	-0.0405217	-1.34079	0.951322	-1.27553	-1.79709	0
904	4	California	3	0.0140369	0.0382082	-0.0405217	-1.34079	0.951322	-1.27553	-1.79709	0
905	4	California	2	0.0140369	0.0382082	-0.0405217	-1.34079	0.951322	-1.27553	1.20291	0
907	4	California	2	0.0140369	0.0382082	-0.0405217	-1.34079	0.951322	-1.27553	0.202913	1
908	4	California	3	0.0140369	0.0382082	-0.0405217	-1.34079	0.951322	-1.27553	0.202913	1
910	4	California	2	0.0140369	0.0382082	-0.0405217	-1.34079	0.951322	-1.27553	1.20291	0
911	4	California	2	0.0140369	0.0382082	-0.0405217	-1.34079	0.951322	-1.27553	2.20291	1
913	4	California	3	0.0140369	0.0382082	-0.0405217	-1.34079	0.951322	-1.27553	1.20291	1
1002	4	California	2	0.0140369	0.0382082	-0.0405217	-1.34079	0.951322	-1.27553	1.20291	1
901.201	4	California	3	0.0140369	0.0382082	-0.0405217	-1.34079	0.951322	-1.27553	-2.79709	1
887.201	4	California	2	0.0140369	0.0382082	-0.0405217	-1.34079	0.951322	-1.27553	-2.79709	0
898.201	4	California	3	0.0140369	0.0382082	-0.0405217	-1.34079	0.951322	-1.27553	-1.79709	0
926.201	4	California	2	0.0140369	0.0382082	-0.0405217	-1.34079	0.951322	-1.27553	-2.79709	0
935.201	4	California	2	0.0140369	0.0382082	-0.0405217	-1.34079	0.951322	-1.27553	-2.79709	0
971.201	4	California	3	0.0140369	0.0382082	-0.0405217	-1.34079	0.951322	-1.27553	-1.79709	0
928.201	4	California	3	0.0140369	0.0382082	-0.0405217	-1.34079	0.951322	-1.27553	-1.79709	0
896.201	4	California	1	0.0140369	0.0382082	-0.0405217	-1.34079	0.951322	-1.27553	-1.79709	0
929.201	4	California	2	0.0140369	0.0382082	-0.0405217	-1.34079	0.951322	-1.27553	-1.79709	0
932.201	4	California	3	0.0140369	0.0382082	-0.0405217	-1.34079	0.951322	-1.27553	-1.79709	0
882.201	4	California	3	0.0140369	0.0382082	-0.0405217	-1.34079	0.951322	-1.27553	-2.79709	1
937.201	4	California	2	0.0140369	0.0382082	-0.0405217	-1.34079	0.951322	-1.27553	-1.79709	0
964.201	4	California	1	0.0140369	0.0382082	-0.0405217	-1.34079	0.951322	-1.27553	-1.79709	1
987.201	4	California	2	0.0140369	0.0382082	-0.0405217	-1.34079	0.951322	-1.27553	-1.79709	0
947.201	4	California	3	0.0140369	0.0382082	-0.0405217	-1.34079	0.951322	-1.27553	-1.79709	1
995.201	4	California	3	0.0140369	0.0382082	-0.0405217	-1.34079	0.951322	-1.27553	-2.79709	1
888.201	4	California	3	0.0140369	0.0382082	-0.0405217	-1.34079	0.951322	-1.27553	-1.79709	0
946.201	4	California	3	0.0140369	0.0382082	-0.0405217	-1.34079	0.951322	-1.27553	-1.79709	1
958.201	4	California	2	0.0140369	0.0382082	-0.0405217	-1.34079	0.951322	-1.27553	-1.79709	1
986.201	4	California	2	0.0140369	0.0382082	-0.0405217	-1.34079	0.951322	-1.27553	-1.79709	1
924.201	4	California	2	0.0140369	0.0382082	-0.0405217	-1.34079	0.951322	-1.27553	0.202913	0
951.201	4	California	3	0.0140369	0.0382082	-0.0405217	-1.34079	0.951322	-1.27553	0.202913	0
960.201	4	California	2	0.0140369	0.0382082	-0.0405217	-1.34079	0.951322	-1.27553	0.202913	1
899.201	4	California	2	0.0140369	0.0382082	-0.0405217	-1.34079	0.951322	-1.27553	0.202913	0
975.201	4	California	2	0.0140369	0.0382082	-0.0405217	-1.34079	0.951322	-1.27553	0.202913	0
913.201	4	California	2	0.0140369	0.0382082	-0.0405217	-1.34079	0.951322	-1.27553	0.202913	1
922.201	4	California	2	0.0140369	0.0382082	-0.0405217	-1.34079	0.951322	-1.27553	0.202913	0
979.201	4	California	2	0.0140369	0.0382082	-0.0405217	-1.34079	0.951322	-1.27553	0.202913	0
917.201	4	California	3	0.0140369	0.0382082	-0.0405217	-1.34079	0.951322	-1.27553	0.202913	1
921.201	4	California	3	0.0140369	0.0382082	-0.0405217	-1.34079	0.951322	-1.27553	0.202913	1
923.201	4	California	3	0.0140369	0.0382082	-0.0405217	-1.34079	0.951322	-1.27553	0.202913	0
973.201	4	California	3	0.0140369	0.0382082	-0.0405217	-1.34079	0.951322	-1.27553	0.202913	1
997.201	4	California	3	0.0140369	0.0382082	-0.0405217	-1.34079	0.951322	-1.27553	0.202913	1
889.201	4	California	2	0.0140369	0.0382082	-0.0405217	-1.34079	0.951322	-1.27553	0.202913	1
892.201	4	California	1	0.0140369	0.0382082	-0.0405217	-1.34079	0.951322	-1.27553	0.202913	0
915.201	4	California	3	0.0140369	0.0382082	-0.0405217	-1.34079	0.951322	-1.27553	0.202913	1
939.201	4	California	3	0.0140369	0.0382082	-0.0405217	-1.34079	0.951322	-1.27553	0.202913	1
952.201	4	California	3	0.0140369	0.0382082	-0.0405217	-1.34079	0.951322	-1.27553	0.202913	1
961.201	4	California	1	0.0140369	0.0382082	-0.0405217	-1.34079	0.951322	-1.27553	0.202913	0
982.201	4	California	2	0.0140369	0.0382082	-0.0405217	-1.34079	0.951322	-1.27553	0.202913	1
991.201	4	California	3	0.0140369	0.0382082	-0.0405217	-1.34079	0.951322	-1.27553	0.202913	1
1002.2	4	California		0.0140369	0.0382082	-0.0405217	-1.34079	0.951322	-1.27553	0.202913	0
903.201	4	California	2	0.0140369	0.0382082	-0.0405217	-1.34079	0.951322	-1.27553	0.202913	0
992.201	4	California	3	0.0140369	0.0382082	-0.0405217	-1.34079	0.951322	-1.27553	0.202913	0
910.201	4	California	2	0.0140369	0.0382082	-0.0405217	-1.34079	0.951322	-1.27553	1.20291	0
919.201	4	California	3	0.0140369	0.0382082	-0.0405217	-1.34079	0.951322	-1.27553	1.20291	1
972.201	4	California	2	0.0140369	0.0382082	-0.0405217	-1.34079	0.951322	-1.27553	1.20291	1
990.201	4	California	1	0.0140369	0.0382082	-0.0405217	-1.34079	0.951322	-1.27553	1.20291	0
884.201	4	California	2	0.0140369	0.0382082	-0.0405217	-1.34079	0.951322	-1.27553	1.20291	0
933.201	4	California	3	0.0140369	0.0382082	-0.0405217	-1.34079	0.951322	-1.27553	1.20291	1
936.201	4	California	3	0.0140369	0.0382082	-0.0405217	-1.34079	0.951322	-1.27553	1.20291	0
955.201	4	California	3	0.0140369	0.0382082	-0.0405217	-1.34079	0.951322	-1.27553	1.20291	1
978.201	4	California	2	0.0140369	0.0382082	-0.0405217	-1.34079	0.951322	-1.27553	1.20291	1
12.2006	4	California	2	0.0140369	0.0382082	-0.0405217	-1.34079	0.951322	-1.27553	1.20291	0
897.201	4	California	2	0.0140369	0.0382082	-0.0405217	-1.34079	0.951322	-1.27553	1.20291	1
920.201	4	California	2	0.0140369	0.0382082	-0.0405217	-1.34079	0.951322	-1.27553	1.20291	1
954.201	4	California	3	0.0140369	0.0382082	-0.0405217	-1.34079	0.951322	-1.27553	1.20291	0
959.201	4	California	3	0.0140369	0.0382082	-0.0405217	-1.34079	0.951322	-1.27553	1.20291	1
908.201	4	California	1	0.0140369	0.0382082	-0.0405217	-1.34079	0.951322	-1.27553	1.20291	0
927.201	4	California	2	0.0140369	0.0382082	-0.0405217	-1.34079	0.951322	-1.27553	1.20291	0
930.201	4	California	3	0.0140369	0.0382082	-0.0405217	-1.34079	0.951322	-1.27553	1.20291	1
934.201	4	California	1	0.0140369	0.0382082	-0.0405217	-1.34079	0.951322	-1.27553	1.20291	0
9.2006	4	California	3	0.0140369	0.0382082	-0.0405217	-1.34079	0.951322	-1.27553	1.20291	1
890.201	4	California	2	0.0140369	0.0382082	-0.0405217	-1.34079	0.951322	-1.27553	1.20291	0
911.201	4	California	1	0.0140369	0.0382082	-0.0405217	-1.34079	0.951322	-1.27553	1.20291	1
914.201	4	California	1	0.0140369	0.0382082	-0.0405217	-1.34079	0.951322	-1.27553	1.20291	1
918.201	4	California	2	0.0140369	0.0382082	-0.0405217	-1.34079	0.951322	-1.27553	1.20291	0
925.201	4	California	2	0.0140369	0.0382082	-0.0405217	-1.34079	0.951322	-1.27553	1.20291	1
931.201	4	California	2	0.0140369	0.0382082	-0.0405217	-1.34079	0.951322	-1.27553	1.20291	1
953.201	4	California	2	0.0140369	0.0382082	-0.0405217	-1.34079	0.951322	-1.27553	1.20291	1
956.201	4	California	1	0.0140369	0.0382082	-0.0405217	-1.34079	0.951322	-1.27553	1.20291	1
994.201	4	California	2	0.0140369	0.0382082	-0.0405217	-1.34079	0.951322	-1.27553	1.20291	1
880.201	4	California	3	0.0140369	0.0382082	-0.0405217	-1.34079	0.951322	-1.27553	2.20291	1
999.201	4	California	3	0.0140369	0.0382082	-0.0405217	-1.34079	0.951322	-1.27553	2.20291	1
907.201	4	California	2	0.0140369	0.0382082	-0.0405217	-1.34079	0.951322	-1.27553	2.20291	0
916.201	4	California	2	0.0140369	0.0382082	-0.0405217	-1.34079	0.951322	-1.27553	2.20291	1
984.201	4	California	3	0.0140369	0.0382082	-0.0405217	-1.34079	0.951322	-1.27553	2.20291	1
885.201	4	California	1	0.0140369	0.0382082	-0.0405217	-1.34079	0.951322	-1.27553	2.20291	0
996.201	4	California	3	0.0140369	0.0382082	-0.0405217	-1.34079	0.951322	-1.27553	2.20291	1
902.201	4	California	3	0.0140369	0.0382082	-0.0405217	-1.34079	0.951322	-1.27553	2.20291	0
906.201	4	California	2	0.0140369	0.0382082	-0.0405217	-1.34079	0.951322	-1.27553	2.20291	0
8.2006	4	California	3	0.0140369	0.0382082	-0.0491082	-1.34079	0.951322	-1.27553	2.20291	0
893.201	4	California	1	0.0140369	0.0382082	-0.0491082	-1.34079	0.951322	-1.27553	2.20291	1
48	5	Colorado	2	-0.285505	-0.106179	0.297746	0.498836	0.887494	0.442714	1.20291	0
217	5	Colorado	2	-0.285505	-0.106179	0.297746	0.498836	0.887494	0.442714	1.20291	0
228	5	Colorado	3	-0.285505	-0.106179	0.297746	0.498836	0.887494	0.442714	1.20291	0
349	5	Colorado	3	-0.285505	-0.106179	0.297746	0.498836	0.887494	0.442714	2.20291	1
355	5	Colorado	1	-0.285505	-0.106179	0.297746	0.498836	0.887494	0.442714	2.20291	0
357	5	Colorado	3	-0.285505	-0.106179	0.297746	0.498836	0.887494	0.442714	1.20291	1
361	5	Colorado	3	-0.285505	-0.106179	0.297746	0.498836	0.887494	0.442714	2.20291	0
362	5	Colorado	2	-0.285505	-0.106179	0.297746	0.498836	0.887494	0.442714	0.202913	0
544	5	Colorado	2	-0.285505	-0.106179	0.297746	0.498836	0.887494	0.442714	-2.79709	1
547	5	Colorado	1	-0.285505	-0.106179	0.297746	0.498836	0.887494	0.442714	1.20291	1
550	5	Colorado	3	-0.285505	-0.106179	0.297746	0.498836	0.887494	0.442714	-1.79709	1
643	5	Colorado	2	-0.285505	-0.106179	0.297746	0.498836	0.887494	0.442714	0.202913	0
760	5	Colorado	3	-0.285505	-0.106179	0.297746	0.498836	0.887494	0.442714	-1.79709	0
877	5	Colorado	3	-0.285505	-0.106179	0.297746	0.498836	0.887494	0.442714	-2.79709	1
878	5	Colorado	2	-0.285505	-0.106179	0.297746	0.498836	0.887494	0.442714	-1.79709	0
882	5	Colorado	2	-0.285505	-0.106179	0.297746	0.498836	0.887494	0.442714	-1.79709	0
883	5	Colorado	2	-0.285505	-0.106179	0.297746	0.498836	0.887494	0.442714	-1.79709	0
886	5	Colorado	3	-0.285505	-0.106179	0.297746	0.498836	0.887494	0.442714	-2.79709	1
861.201	5	Colorado	2	-0.285505	-0.106179	0.297746	0.498836	0.887494	0.442714	-1.79709	0
871.201	5	Colorado	2	-0.285505	-0.106179	0.297746	0.498836	0.887494	0.442714	-1.79709	0
801.201	5	Colorado	3	-0.285505	-0.106179	0.297746	0.498836	0.887494	0.442714	-1.79709	0
796.201	5	Colorado	1	-0.285505	-0.106179	0.297746	0.498836	0.887494	0.442714	-1.79709	0
866.201	5	Colorado	3	-0.285505	-0.106179	0.297746	0.498836	0.887494	0.442714	-1.79709	0
804.201	5	Colorado	1	-0.285505	-0.106179	0.297746	0.498836	0.887494	0.442714	0.202913	1
873.201	5	Colorado	2	-0.285505	-0.106179	0.297746	0.498836	0.887494	0.442714	-0.797087	1
795.201	5	Colorado	2	-0.285505	-0.106179	0.297746	0.498836	0.887494	0.442714	1.20291	1
809.201	5	Colorado	2	-0.285505	-0.106179	0.297746	0.498836	0.887494	0.442714	1.20291	0
813.201	5	Colorado	2	-0.285505	-0.106179	0.297746	0.498836	0.887494	0.442714	1.20291	0
864.201	5	Colorado	2	-0.285505	-0.106179	0.297746	0.498836	0.887494	0.442714	1.20291	0
878.201	5	Colorado	2	-0.285505	-0.106179	0.297746	0.498836	0.887494	0.442714	1.20291	1
812.201	5	Colorado	2	-0.285505	-0.106179	0.297746	0.498836	0.887494	0.442714	1.20291	1
838.201	5	Colorado	1	-0.285505	-0.106179	0.297746	0.498836	0.887494	0.442714	2.20291	1
808.201	5	Colorado	2	-0.285505	-0.106179	0.297746	0.498836	0.887494	0.442714	2.20291	1
852.201	5	Colorado	3	-0.285505	-0.106179	0.297746	0.498836	0.887494	0.442714	2.20291	0
877.201	5	Colorado	2	-0.285505	-0.106179	0.297746	0.498836	0.887494	0.442714	2.20291	1
800.201	5	Colorado	2	-0.285505	-0.106179	0.297746	0.498836	0.887494	0.442714	2.20291	1
869.201	5	Colorado	3	-0.285505	-0.106179	0.297746	0.498836	0.887494	0.442714	2.20291	1
24	6	Conneticut	2	0.0698948	-0.219239	-1.39359	0.292136	2.31948	0.677604	1.20291	1
35	6	Conneticut	2	0.0698948	-0.219239	-1.39359	0.292136	2.31948	0.677604	2.20291	0
412	6	Conneticut	1	0.0698948	-0.219239	-1.39359	0.292136	2.31948	0.677604	-1.79709	1
773	6	Conneticut	3	0.0698948	-0.219239	-1.39359	0.292136	2.31948	0.677604	-1.79709	0
778	6	Conneticut	2	0.0698948	-0.219239	-1.39359	0.292136	2.31948	0.677604	0.202913	0
576.201	6	Conneticut	1	0.0698948	-0.219239	-1.39359	0.292136	2.31948	0.677604		0
581.201	6	Conneticut	2	0.0698948	-0.219239	-1.39359	0.292136	2.31948	0.677604	-1.79709	0
628.201	6	Conneticut	3	0.0698948	-0.219239	-1.39359	0.292136	2.31948	0.677604	-1.79709	1
773.201	6	Conneticut	2	0.0698948	-0.219239	-1.39359	0.292136	2.31948	0.677604	-1.79709	0
610.201	6	Conneticut	3	0.0698948	-0.219239	-1.39359	0.292136	2.31948	0.677604	-2.79709	1
764.201	6	Conneticut	3	0.0698948	-0.219239	-1.39359	0.292136	2.31948	0.677604	-2.79709	1
490.201	6	Conneticut	2	0.0698948	-0.219239	-1.39359	0.292136	2.31948	0.677604	0.202913	0
700.201	6	Conneticut	3	0.0698948	-0.219239	-1.39359	0.292136	2.31948	0.677604	0.202913	1
729.201	6	Conneticut	2	0.0698948	-0.219239	-1.39359	0.292136	2.31948	0.677604	1.20291	0
520.201	6	Conneticut	3	0.0698948	-0.219239	-1.39359	0.292136	2.31948	0.677604	1.20291	1
635.201	6	Conneticut	2	0.0698948	-0.219239	-1.39359	0.292136	2.31948	0.677604	1.20291	1
400	7	Delaware	3	0.968335	1.06251	0.382313	-0.576004	1.48146	-0.853329	0.202913	1
454	7	Delaware	2	0.968335	1.06251	0.382313	-0.576004	1.48146	-0.853329	2.20291	1
462	7	Delaware	2	0.968335	1.06251	0.382313	-0.576004	1.48146	-0.853329	-3.79709	0
523.201	7	Delaware	3	0.968335	1.06251	0.382313	-0.576004	1.48146	-0.853329	0.202913	0
749.201	7	Delaware	2	0.968335	1.06251	0.382313	-0.576004	1.48146	-0.853329	1.20291	1
708.201	7	Delaware	2	0.968335	1.06251	0.382313	-0.576004	1.48146	-0.853329	1.20291	1
29	8	Florida	3	0.347038	0.0067469	0.213179	-1.96089	-0.127453	0.249921	-1.79709	1
75	8	Florida		0.347038	0.0067469	0.213179	-1.96089	-0.127453	0.249921	1.20291	1
79	8	Florida	2	0.347038	0.0067469	0.213179	-1.96089	-0.127453	0.249921	-1.79709	0
87	8	Florida	2	0.347038	0.0067469	0.213179	-1.96089	-0.127453	0.249921	-1.79709	1
106	8	Florida	3	0.347038	0.0067469	0.213179	-1.96089	-0.127453	0.249921	-1.79709	1
110	8	Florida	2	0.347038	0.0067469	0.213179	-1.96089	-0.127453	0.249921	0.202913	0
113	8	Florida	3	0.347038	0.0067469	0.213179	-1.96089	-0.127453	0.249921	-1.79709	0
133	8	Florida	2	0.347038	0.0067469	0.213179	-1.96089	-0.127453	0.249921	0.202913	0
146	8	Florida	2	0.347038	0.0067469	0.213179	-1.96089	-0.127453	0.249921	1.20291	0
152	8	Florida	2	0.347038	0.0067469	0.213179	-1.96089	-0.127453	0.249921	0.202913	0
157	8	Florida	2	0.347038	0.0067469	0.213179	-1.96089	-0.127453	0.249921	1.20291	1
160	8	Florida	3	0.347038	0.0067469	0.213179	-1.96089	-0.127453	0.249921	2.20291	1
270	8	Florida	2	0.347038	0.0067469	0.213179	-1.96089	-0.127453	0.249921	0.202913	0
274	8	Florida	3	0.347038	0.0067469	0.213179	-1.96089	-0.127453	0.249921	-1.79709	1
277	8	Florida	2	0.347038	0.0067469	0.213179	-1.96089	-0.127453	0.249921	1.20291	0
280	8	Florida	2	0.347038	0.0067469	0.213179	-1.96089	-0.127453	0.249921	2.20291	1
281	8	Florida	2	0.347038	0.0067469	0.213179	-1.96089	-0.127453	0.249921	0.202913	1
282	8	Florida	3	0.347038	0.0067469	0.213179	-1.96089	-0.127453	0.249921	0.202913	1
283	8	Florida	2	0.347038	0.0067469	0.213179	-1.96089	-0.127453	0.249921	0.202913	1
287	8	Florida	3	0.347038	0.0067469	0.213179	-1.96089	-0.127453	0.249921	1.20291	1
288	8	Florida	3	0.347038	0.0067469	0.213179	-1.96089	-0.127453	0.249921	0.202913	1
367	8	Florida	3	0.347038	0.0067469	0.213179	-1.96089	-0.127453	0.249921	0.202913	1
369	8	Florida	2	0.347038	0.0067469	0.213179	-1.96089	-0.127453	0.249921	-2.79709	0
379	8	Florida	3	0.347038	0.0067469	0.213179	-1.96089	-0.127453	0.249921	1.20291	1
393	8	Florida	2	0.347038	0.0067469	0.213179	-1.96089	-0.127453	0.249921	-2.79709	0
403	8	Florida	2	0.347038	0.0067469	0.213179	-1.96089	-0.127453	0.249921	1.20291	0
421	8	Florida	2	0.347038	0.0067469	0.213179	-1.96089	-0.127453	0.249921	0.202913	0
431	8	Florida	3	0.347038	0.0067469	0.213179	-1.96089	-0.127453	0.249921	1.20291	0
439	8	Florida	2	0.347038	0.0067469	0.213179	-1.96089	-0.127453	0.249921	-2.79709	0
565	8	Florida	2	0.347038	0.0067469	0.213179	-1.96089	-0.127453	0.249921	-2.79709	1
567	8	Florida	3	0.347038	0.0067469	0.213179	-1.96089	-0.127453	0.249921	1.20291	1
590	8	Florida	2	0.347038	0.0067469	0.213179	-1.96089	-0.127453	0.249921	1.20291	1
594	8	Florida	3	0.347038	0.0067469	0.213179	-1.96089	-0.127453	0.249921	0.202913	0
601	8	Florida	2	0.347038	0.0067469	0.213179	-1.96089	-0.127453	0.249921	0.202913	0
611	8	Florida	3	0.347038	0.0067469	0.213179	-1.96089	-0.127453	0.249921	0.202913	1
625	8	Florida	3	0.347038	0.0067469	0.213179	-1.96089	-0.127453	0.249921	-2.79709	0
648	8	Florida	2	0.347038	0.0067469	0.213179	-1.96089	-0.127453	0.249921	1.20291	0
733	8	Florida	2	0.347038	0.0067469	0.213179	-1.96089	-0.127453	0.249921	1.20291	1
736	8	Florida	2	0.347038	0.0067469	0.213179	-1.96089	-0.127453	0.249921	1.20291	1
821	8	Florida	3	0.347038	0.0067469	0.213179	-1.96089	-0.127453	0.249921	0.202913	0
824	8	Florida	3	0.347038	0.0067469	0.213179	-1.96089	-0.127453	0.249921	0.202913	1
825	8	Florida	2	0.347038	0.0067469	0.213179	-1.96089	-0.127453	0.249921	1.20291	1
827	8	Florida	3	0.347038	0.0067469	0.213179	-1.96089	-0.127453	0.249921	-1.79709	1
831	8	Florida	3	0.347038	0.0067469	0.213179	-1.96089	-0.127453	0.249921	0.202913	1
834	8	Florida	3	0.347038	0.0067469	0.213179	-1.96089	-0.127453	0.249921	2.20291	1
840	8	Florida	2	0.347038	0.0067469	0.213179	-1.96089	-0.127453	0.249921	2.20291	1
843	8	Florida	3	0.347038	0.0067469	0.213179	-1.96089	-0.127453	0.249921	-1.79709	1
845	8	Florida	2	0.347038	0.0067469	0.213179	-1.96089	-0.127453	0.249921	1.20291	0
850	8	Florida	3	0.347038	0.0067469	0.213179	-1.96089	-0.127453	0.249921	-1.79709	0
984	8	Florida	2	0.347038	0.0067469	0.213179	-1.96089	-0.127453	0.249921	1.20291	1
985	8	Florida	2	0.347038	0.0067469	0.213179	-1.96089	-0.127453	0.249921	0.202913	0
987	8	Florida	2	0.347038	0.0067469	0.213179	-1.96089	-0.127453	0.249921	-2.79709	0
988	8	Florida	3	0.347038	0.0067469	0.213179	-1.96089	-0.127453	0.249921	1.20291	0
989	8	Florida	1	0.347038	0.0067469	0.213179	-1.96089	-0.127453	0.249921	1.20291	1
990	8	Florida		0.347038	0.0067469	0.213179	-1.96089	-0.127453	0.249921	1.20291	0
991	8	Florida	2	0.347038	0.0067469	0.213179	-1.96089	-0.127453	0.249921	0.202913	0
433.201	8	Florida	2	0.347038	0.0067469	0.213179	-1.96089	-0.127453	0.249921		1
5.2006	8	Florida	3	0.347038	0.0067469	0.213179	-1.96089	-0.127453	0.249921	-1.79709	1
445.201	8	Florida	2	0.347038	0.0067469	0.213179	-1.96089	-0.127453	0.249921	-2.79709	0
577.201	8	Florida	2	0.347038	0.0067469	0.213179	-1.96089	-0.127453	0.249921	-1.79709	0
213.201	8	Florida	2	0.347038	0.0067469	0.213179	-1.96089	-0.127453	0.249921	-1.79709	0
590.201	8	Florida		0.347038	0.0067469	0.213179	-1.96089	-0.127453	0.249921	-2.79709	1
493.201	8	Florida	2	0.347038	0.0067469	0.213179	-1.96089	-0.127453	0.249921	-1.79709	0
541.201	8	Florida	3	0.347038	0.0067469	0.213179	-1.96089	-0.127453	0.249921	-1.79709	0
688.201	8	Florida	3	0.347038	0.0067469	0.213179	-1.96089	-0.127453	0.249921	-1.79709	1
142.201	8	Florida	2	0.347038	0.0067469	0.213179	-1.96089	-0.127453	0.249921	-1.79709	0
699.201	8	Florida	3	0.347038	0.0067469	0.213179	-1.96089	-0.127453	0.249921	-1.79709	0
303.201	8	Florida	2	0.347038	0.0067469	0.213179	-1.96089	-0.127453	0.249921	-1.79709	0
347.201	8	Florida	3	0.347038	0.0067469	0.213179	-1.96089	-0.127453	0.249921	-1.79709	1
451.201	8	Florida	2	0.347038	0.0067469	0.213179	-1.96089	-0.127453	0.249921	-1.79709	0
456.201	8	Florida	3	0.347038	0.0067469	0.213179	-1.96089	-0.127453	0.249921	-1.79709	1
646.201	8	Florida	1	0.347038	0.0067469	0.213179	-1.96089	-0.127453	0.249921	-1.79709	0
779.201	8	Florida	2	0.347038	0.0067469	0.213179	-1.96089	-0.127453	0.249921	-2.79709	1
484.201	8	Florida	2	0.347038	0.0067469	0.213179	-1.96089	-0.127453	0.249921	-1.79709	1
568.201	8	Florida	3	0.347038	0.0067469	0.213179	-1.96089	-0.127453	0.249921	-1.79709	1
620.201	8	Florida	3	0.347038	0.0067469	0.213179	-1.96089	-0.127453	0.249921	-1.79709	1
633.201	8	Florida	2	0.347038	0.0067469	0.213179	-1.96089	-0.127453	0.249921	-1.79709	1
781.201	8	Florida	3	0.347038	0.0067469	0.213179	-1.96089	-0.127453	0.249921	-1.79709	0
685.201	8	Florida	2	0.347038	0.0067469	0.213179	-1.96089	-0.127453	0.249921	0.202913	1
353.201	8	Florida	2	0.347038	0.0067469	0.213179	-1.96089	-0.127453	0.249921	0.202913	1
327.201	8	Florida	2	0.347038	0.0067469	0.213179	-1.96089	-0.127453	0.249921	0.202913	1
6.2006	8	Florida	3	0.347038	0.0067469	0.213179	-1.96089	-0.127453	0.249921	0.202913	0
557.201	8	Florida	3	0.347038	0.0067469	0.213179	-1.96089	-0.127453	0.249921	0.202913	0
745.201	8	Florida	3	0.347038	0.0067469	0.213179	-1.96089	-0.127453	0.249921	0.202913	1
282.201	8	Florida	2	0.347038	0.0067469	0.213179	-1.96089	-0.127453	0.249921	0.202913	1
497.201	8	Florida	2	0.347038	0.0067469	0.213179	-1.96089	-0.127453	0.249921	0.202913	1
705.201	8	Florida	2	0.347038	0.0067469	0.213179	-1.96089	-0.127453	0.249921	0.202913	0
717.201	8	Florida		0.347038	0.0067469	0.213179	-1.96089	-0.127453	0.249921	0.202913	0
719.201	8	Florida	1	0.347038	0.0067469	0.213179	-1.96089	-0.127453	0.249921	0.202913	0
572.201	8	Florida	2	0.347038	0.0067469	0.213179	-1.96089	-0.127453	0.249921	0.202913	1
454.201	8	Florida	2	0.347038	0.0067469	0.213179	-1.96089	-0.127453	0.249921	1.20291	1
522.201	8	Florida	3	0.347038	0.0067469	0.213179	-1.96089	-0.127453	0.249921	1.20291	1
609.201	8	Florida	1	0.347038	0.0067469	0.213179	-1.96089	-0.127453	0.249921	1.20291	1
663.201	8	Florida	2	0.347038	0.0067469	0.213179	-1.96089	-0.127453	0.249921	1.20291	1
681.201	8	Florida	1	0.347038	0.0067469	0.213179	-1.96089	-0.127453	0.249921	1.20291	1
556.201	8	Florida	1	0.347038	0.0067469	0.213179	-1.96089	-0.127453	0.249921	1.20291	0
227.201	8	Florida	2	0.347038	0.0067469	0.213179	-1.96089	-0.127453	0.249921	1.20291	0
671.201	8	Florida	2	0.347038	0.0067469	0.213179	-1.96089	-0.127453	0.249921	1.20291	1
754.201	8	Florida	2	0.347038	0.0067469	0.213179	-1.96089	-0.127453	0.249921	1.20291	0
464.201	8	Florida	2	0.347038	0.0067469	0.213179	-1.96089	-0.127453	0.249921	1.20291	0
546.201	8	Florida	2	0.347038	0.0067469	0.213179	-1.96089	-0.127453	0.249921	1.20291	0
587.201	8	Florida	3	0.347038	0.0067469	0.213179	-1.96089	-0.127453	0.249921	1.20291	1
686.201	8	Florida	1	0.347038	0.0067469	0.213179	-1.96089	-0.127453	0.249921	1.20291	0
626.201	8	Florida	3	0.347038	0.0067469	0.213179	-1.96089	-0.127453	0.249921	2.20291	0
547.201	8	Florida	2	0.347038	0.0067469	0.213179	-1.96089	-0.127453	0.249921	2.20291	0
19.2006	8	Florida	3	0.347038	0.0067469	0.213179	-1.96089	-0.127453	0.249921	2.20291	0
158.201	8	Florida	2	0.347038	0.0067469	0.213179	-1.96089	-0.127453	0.249921	2.20291	0
447.201	8	Florida	1	0.347038	0.0067469	0.213179	-1.96089	-0.127453	0.249921	2.20291	1
513.201	8	Florida	3	0.347038	0.0067469	0.213179	-1.96089	-0.127453	0.249921	2.20291	0
667.201	8	Florida		0.347038	0.0067469	0.213179	-1.96089	-0.127453	0.249921	2.20291	1
30	9	Georgia	3	1.5789	1.3308	1.14342	-0.741364	-0.101892	0.0755392	-1.79709	1
96	9	Georgia		1.5789	1.3308	1.14342	-0.741364	-0.101892	0.0755392	1.20291	1
101	9	Georgia	2	1.5789	1.3308	1.14342	-0.741364	-0.101892	0.0755392	0.202913	0
139	9	Georgia	2	1.5789	1.3308	1.14342	-0.741364	-0.101892	0.0755392	0.202913	1
150	9	Georgia	3	1.5789	1.3308	1.14342	-0.741364	-0.101892	0.0755392	0.202913	0
155	9	Georgia	3	1.5789	1.3308	1.14342	-0.741364	-0.101892	0.0755392	1.20291	1
279	9	Georgia	3	1.5789	1.3308	1.14342	-0.741364	-0.101892	0.0755392	-1.79709	1
285	9	Georgia	3	1.5789	1.3308	1.14342	-0.741364	-0.101892	0.0755392	-2.79709	1
383	9	Georgia	3	1.5789	1.3308	1.14342	-0.741364	-0.101892	0.0755392	-0.797087	0
387	9	Georgia	3	1.5789	1.3308	1.14342	-0.741364	-0.101892	0.0755392	-1.79709	0
406	9	Georgia	3	1.5789	1.3308	1.14342	-0.741364	-0.101892	0.0755392	0.202913	0
418	9	Georgia	2	1.5789	1.3308	1.14342	-0.741364	-0.101892	0.0755392	2.20291	0
420	9	Georgia	1	1.5789	1.3308	1.14342	-0.741364	-0.101892	0.0755392	-1.79709	1
453	9	Georgia	2	1.5789	1.3308	1.14342	-0.741364	-0.101892	0.0755392	-1.79709	0
584	9	Georgia	2	1.5789	1.3308	1.14342	-0.741364	-0.101892	0.0755392	0.202913	1
658	9	Georgia	3	1.5789	1.3308	1.14342	-0.741364	-0.101892	0.0755392	-1.79709	0
724	9	Georgia	2	1.5789	1.3308	1.14342	-0.741364	-0.101892	0.0755392	2.20291	1
823	9	Georgia	3	1.5789	1.3308	1.14342	-0.741364	-0.101892	0.0755392	0.202913	0
833	9	Georgia	3	1.5789	1.3308	1.14342	-0.741364	-0.101892	0.0755392	0.202913	1
835	9	Georgia	1	1.5789	1.3308	1.14342	-0.741364	-0.101892	0.0755392	-1.79709	0
836	9	Georgia		1.5789	1.3308	1.14342	-0.741364	-0.101892	0.0755392	-1.79709	0
975	9	Georgia	2	1.5789	1.3308	1.14342	-0.741364	-0.101892	0.0755392	1.20291	0
979	9	Georgia	1	1.5789	1.3308	1.14342	-0.741364	-0.101892	0.0755392	0.202913	0
982	9	Georgia	2	1.5789	1.3308	1.14342	-0.741364	-0.101892	0.0755392	1.20291	1
994	9	Georgia	3	1.5789	1.3308	1.14342	-0.741364	-0.101892	0.0755392	-1.79709	1
665.201	9	Georgia	2	1.5789	1.3308	1.14342	-0.741364	-0.101892	0.0755392	-1.79709	0
605.201	9	Georgia	3	1.5789	1.3308	1.14342	-0.741364	-0.101892	0.0755392	-1.79709	0
624.201	9	Georgia	2	1.5789	1.3308	1.14342	-0.741364	-0.101892	0.0755392	-1.79709	0
680.201	9	Georgia	3	1.5789	1.3308	1.14342	-0.741364	-0.101892	0.0755392	-2.79709	1
10.2006	9	Georgia	1	1.5789	1.3308	1.14342	-0.741364	-0.101892	0.0755392	0.202913	0
488.201	9	Georgia		1.5789	1.3308	1.14342	-0.741364	-0.101892	0.0755392	0.202913	1
642.201	9	Georgia		1.5789	1.3308	1.14342	-0.741364	-0.101892	0.0755392	0.202913	1
684.201	9	Georgia	2	1.5789	1.3308	1.14342	-0.741364	-0.101892	0.0755392	1.20291	1
480.201	9	Georgia	2	1.5789	1.3308	1.14342	-0.741364	-0.101892	0.0755392	1.20291	1
551.201	9	Georgia	2	1.5789	1.3308	1.14342	-0.741364	-0.101892	0.0755392	1.20291	1
780.201	9	Georgia	3	1.5789	1.3308	1.14342	-0.741364	-0.101892	0.0755392	1.20291	1
549.201	9	Georgia	1	1.5789	1.3308	1.14342	-0.741364	-0.101892	0.0755392	1.20291	0
756.201	9	Georgia	2	1.5789	1.3308	1.14342	-0.741364	-0.101892	0.0755392	1.20291	0
489.201	9	Georgia	2	1.5789	1.3308	1.14342	-0.741364	-0.101892	0.0755392	2.20291	1
670.201	9	Georgia		1.5789	1.3308	1.14342	-0.741364	-0.101892	0.0755392	2.20291	0
783.201	9	Georgia	2	1.5789	1.3308	1.14342	-0.741364	-0.101892	0.0755392	2.20291	0
43	11	Idaho	1	-1.11539	-1.22239	-0.125089	0.953576	-0.713381	-0.680262	1.20291	0
44	11	Idaho	1	-1.11539	-1.22239	-0.125089	0.953576	-0.713381	-0.680262	-1.79709	1
45	11	Idaho	2	-1.11539	-1.22239	-0.125089	0.953576	-0.713381	-0.680262	0.202913	0
218	11	Idaho		-1.11539	-1.22239	-0.125089	0.953576	-0.713381	-0.680262	1.20291	1
351	11	Idaho	3	-1.11539	-1.22239	-0.125089	0.953576	-0.713381	-0.680262	-1.79709	0
353	11	Idaho	3	-1.11539	-1.22239	-0.125089	0.953576	-0.713381	-0.680262	-0.797087	1
945.201	11	Idaho	2	-1.11539	-1.22239	-0.125089	0.953576	-0.713381	-0.680262	-2.79709	1
867.201	11	Idaho	1	-1.11539	-1.22239	-0.125089	0.953576	-0.713381	-0.680262	-2.79709	0
875.201	11	Idaho	1	-1.11539	-1.22239	-0.125089	0.953576	-0.713381	-0.680262	-1.79709	1
942.201	11	Idaho	2	-1.11539	-1.22239	-0.125089	0.953576	-0.713381	-0.680262	-1.79709	1
819.201	11	Idaho	1	-1.11539	-1.22239	-0.125089	0.953576	-0.713381	-0.680262	1.20291	1
826.201	11	Idaho	2	-1.11539	-1.22239	-0.125089	0.953576	-0.713381	-0.680262	1.20291	0
21	12	Illinois	2	0.68416	0.948713	-0.0405217	0.519506	0.518723	0.269479	-1.79709	1
22	12	Illinois	2	0.68416	0.948713	-0.0405217	0.519506	0.518723	0.269479	-1.79709	1
65	12	Illinois	1	0.68416	0.948713	-0.0405217	0.519506	0.518723	0.269479	1.20291	1
78	12	Illinois	2	0.68416	0.948713	-0.0405217	0.519506	0.518723	0.269479	2.20291	1
135	12	Illinois	3	0.68416	0.948713	-0.0405217	0.519506	0.518723	0.269479	-1.79709	0
295	12	Illinois	2	0.68416	0.948713	-0.0405217	0.519506	0.518723	0.269479	2.20291	1
300	12	Illinois	2	0.68416	0.948713	-0.0405217	0.519506	0.518723	0.269479	2.20291	1
301	12	Illinois	2	0.68416	0.948713	-0.0405217	0.519506	0.518723	0.269479	0.202913	0
429	12	Illinois	3	0.68416	0.948713	-0.0405217	0.519506	0.518723	0.269479	0.202913	1
467	12	Illinois	2	0.68416	0.948713	-0.0405217	0.519506	0.518723	0.269479	0.202913	1
673	12	Illinois	3	0.68416	0.948713	-0.0405217	0.519506	0.518723	0.269479	0.202913	1
679	12	Illinois	2	0.68416	0.948713	-0.0405217	0.519506	0.518723	0.269479	0.202913	0
799	12	Illinois	3	0.68416	0.948713	-0.0405217	0.519506	0.518723	0.269479	1.20291	0
804	12	Illinois	1	0.68416	0.948713	-0.0405217	0.519506	0.518723	0.269479	-1.79709	1
806	12	Illinois	2	0.68416	0.948713	-0.0405217	0.519506	0.518723	0.269479	2.20291	1
808	12	Illinois	2	0.68416	0.948713	-0.0405217	0.519506	0.518723	0.269479	1.20291	0
813	12	Illinois	3	0.68416	0.948713	-0.0405217	0.519506	0.518723	0.269479		1
943	12	Illinois	3	0.68416	0.948713	-0.0405217	0.519506	0.518723	0.269479	-1.79709	0
945	12	Illinois		0.68416	0.948713	-0.0405217	0.519506	0.518723	0.269479	1.20291	1
946	12	Illinois	3	0.68416	0.948713	-0.0405217	0.519506	0.518723	0.269479	0.202913	1
948	12	Illinois	2	0.68416	0.948713	-0.0405217	0.519506	0.518723	0.269479	1.20291	0
953	12	Illinois	3	0.68416	0.948713	-0.0405217	0.519506	0.518723	0.269479	1.20291	1
954	12	Illinois	1	0.68416	0.948713	-0.0405217	0.519506	0.518723	0.269479	2.20291	0
177.201	12	Illinois	1	0.68416	0.948713	-0.0405217	0.519506	0.518723	0.269479	-1.79709	0
355.201	12	Illinois	3	0.68416	0.948713	-0.0405217	0.519506	0.518723	0.269479	-2.79709	1
87.2006	12	Illinois	2	0.68416	0.948713	-0.0405217	0.519506	0.518723	0.269479	-1.79709	0
48.2006	12	Illinois	3	0.68416	0.948713	-0.0405217	0.519506	0.518723	0.269479	-1.79709	0
80.2006	12	Illinois	3	0.68416	0.948713	-0.0405217	0.519506	0.518723	0.269479	-1.79709	1
167.201	12	Illinois	2	0.68416	0.948713	-0.0405217	0.519506	0.518723	0.269479	-1.79709	0
285.201	12	Illinois	3	0.68416	0.948713	-0.0405217	0.519506	0.518723	0.269479	-1.79709	0
318.201	12	Illinois	2	0.68416	0.948713	-0.0405217	0.519506	0.518723	0.269479	-1.79709	0
212.201	12	Illinois	3	0.68416	0.948713	-0.0405217	0.519506	0.518723	0.269479	-1.79709	0
216.201	12	Illinois	1	0.68416	0.948713	-0.0405217	0.519506	0.518723	0.269479	-1.79709	1
230.201	12	Illinois	2	0.68416	0.948713	-0.0405217	0.519506	0.518723	0.269479	-1.79709	0
245.201	12	Illinois	3	0.68416	0.948713	-0.0405217	0.519506	0.518723	0.269479	-1.79709	1
339.201	12	Illinois	2	0.68416	0.948713	-0.0405217	0.519506	0.518723	0.269479	-1.79709	1
391.201	12	Illinois	3	0.68416	0.948713	-0.0405217	0.519506	0.518723	0.269479	-1.79709	1
46.2006	12	Illinois	2	0.68416	0.948713	-0.0405217	0.519506	0.518723	0.269479	-1.79709	1
218.201	12	Illinois	3	0.68416	0.948713	-0.0405217	0.519506	0.518723	0.269479	-1.79709	1
276.201	12	Illinois	3	0.68416	0.948713	-0.0405217	0.519506	0.518723	0.269479	-1.79709	1
326.201	12	Illinois	3	0.68416	0.948713	-0.0405217	0.519506	0.518723	0.269479	-1.79709	0
111.201	12	Illinois	3	0.68416	0.948713	-0.0405217	0.519506	0.518723	0.269479	-1.79709	1
187.201	12	Illinois	3	0.68416	0.948713	-0.0405217	0.519506	0.518723	0.269479	-1.79709	1
278.201	12	Illinois	3	0.68416	0.948713	-0.0405217	0.519506	0.518723	0.269479	-1.79709	1
359.201	12	Illinois	3	0.68416	0.948713	-0.0405217	0.519506	0.518723	0.269479	-1.79709	1
372.201	12	Illinois	2	0.68416	0.948713	-0.0405217	0.519506	0.518723	0.269479	-1.79709	1
152.201	12	Illinois	2	0.68416	0.948713	-0.0405217	0.519506	0.518723	0.269479	0.202913	1
297.201	12	Illinois	2	0.68416	0.948713	-0.0405217	0.519506	0.518723	0.269479	0.202913	1
157.201	12	Illinois	3	0.68416	0.948713	-0.0405217	0.519506	0.518723	0.269479	-0.797087	0
114.201	12	Illinois	3	0.68416	0.948713	-0.0405217	0.519506	0.518723	0.269479	0.202913	0
57.2006	12	Illinois	2	0.68416	0.948713	-0.0405217	0.519506	0.518723	0.269479	0.202913	0
223.201	12	Illinois	3	0.68416	0.948713	-0.0405217	0.519506	0.518723	0.269479	0.202913	1
342.201	12	Illinois	3	0.68416	0.948713	-0.0405217	0.519506	0.518723	0.269479	0.202913	0
24.2006	12	Illinois	2	0.68416	0.948713	-0.0405217	0.519506	0.518723	0.269479	0.202913	0
184.201	12	Illinois	3	0.68416	0.948713	-0.0405217	0.519506	0.518723	0.269479	0.202913	0
270.201	12	Illinois	3	0.68416	0.948713	-0.0405217	0.519506	0.518723	0.269479	0.202913	1
37.2006	12	Illinois	3	0.68416	0.948713	-0.0405217	0.519506	0.518723	0.269479	0.202913	0
144.201	12	Illinois	2	0.68416	0.948713	-0.0405217	0.519506	0.518723	0.269479	0.202913	0
380.201	12	Illinois	2	0.68416	0.948713	-0.0405217	0.519506	0.518723	0.269479	-0.797087	1
63.2006	12	Illinois	2	0.68416	0.948713	-0.0405217	0.519506	0.518723	0.269479	1.20291	0
30.2006	12	Illinois	1	0.68416	0.948713	-0.0405217	0.519506	0.518723	0.269479	1.20291	1
88.2006	12	Illinois	2	0.68416	0.948713	-0.0405217	0.519506	0.518723	0.269479	1.20291	1
125.201	12	Illinois	2	0.68416	0.948713	-0.0405217	0.519506	0.518723	0.269479	1.20291	0
145.201	12	Illinois	2	0.68416	0.948713	-0.0405217	0.519506	0.518723	0.269479	1.20291	0
58.2006	12	Illinois	3	0.68416	0.948713	-0.0405217	0.519506	0.518723	0.269479	1.20291	1
293.201	12	Illinois	2	0.68416	0.948713	-0.0405217	0.519506	0.518723	0.269479	1.20291	0
325.201	12	Illinois	2	0.68416	0.948713	-0.0405217	0.519506	0.518723	0.269479	1.20291	0
25.2006	12	Illinois	2	0.68416	0.948713	-0.0405217	0.519506	0.518723	0.269479	1.20291	1
156.201	12	Illinois	3	0.68416	0.948713	-0.0405217	0.519506	0.518723	0.269479	1.20291	1
185.201	12	Illinois	1	0.68416	0.948713	-0.0405217	0.519506	0.518723	0.269479	1.20291	0
249.201	12	Illinois	2	0.68416	0.948713	-0.0405217	0.519506	0.518723	0.269479	1.20291	0
306.201	12	Illinois	2	0.68416	0.948713	-0.0405217	0.519506	0.518723	0.269479	1.20291	1
196.201	12	Illinois	2	0.68416	0.948713	-0.0405217	0.519506	0.518723	0.269479	1.20291	1
242.201	12	Illinois	3	0.68416	0.948713	-0.0405217	0.519506	0.518723	0.269479	1.20291	0
62.2006	12	Illinois	2	0.68416	0.948713	-0.0405217	0.519506	0.518723	0.269479	1.20291	1
199.201	12	Illinois		0.68416	0.948713	-0.0405217	0.519506	0.518723	0.269479	1.20291	1
143.201	12	Illinois	2	0.68416	0.948713	-0.0405217	0.519506	0.518723	0.269479	2.20291	0
263.201	12	Illinois	2	0.68416	0.948713	-0.0405217	0.519506	0.518723	0.269479	2.20291	1
322.201	12	Illinois	2	0.68416	0.948713	-0.0405217	0.519506	0.518723	0.269479	2.20291	0
148.201	12	Illinois	1	0.68416	0.948713	-0.0405217	0.519506	0.518723	0.269479	2.20291	1
42.2006	12	Illinois	3	0.68416	0.948713	-0.0405217	0.519506	0.518723	0.269479	2.20291	0
94.2006	12	Illinois	2	0.68416	0.948713	-0.0405217	0.519506	0.518723	0.269479	2.20291	0
329.201	12	Illinois	2	0.68416	0.948713	-0.0405217	0.519506	0.518723	0.269479	2.20291	0
194.201	12	Illinois	2	0.68416	0.948713	-0.0405217	0.519506	0.518723	0.269479	2.20291	1
67	13	Indiana	3	-0.204162	0.00721547	0.297746	0.126776	-0.483764	-0.0613296	-1.79709	0
71	13	Indiana	2	-0.204162	0.00721547	0.297746	0.126776	-0.483764	-0.0613296	1.20291	1
83	13	Indiana	3	-0.204162	0.00721547	0.297746	0.126776	-0.483764	-0.0613296	-1.79709	1
89	13	Indiana	2	-0.204162	0.00721547	0.297746	0.126776	-0.483764	-0.0613296	-2.79709	1
148	13	Indiana	3	-0.204162	0.00721547	0.297746	0.126776	-0.483764	-0.0613296	0.202913	1
577	13	Indiana	3	-0.204162	0.00721547	0.297746	0.126776	-0.483764	-0.0613296	-1.79709	1
580	13	Indiana	1	-0.204162	0.00721547	0.297746	0.126776	-0.483764	-0.0613296	2.20291	1
593	13	Indiana	2	-0.204162	0.00721547	0.297746	0.126776	-0.483764	-0.0613296	0.202913	0
656	13	Indiana	2	-0.204162	0.00721547	0.297746	0.126776	-0.483764	-0.0613296	-1.79709	0
664	13	Indiana	3	-0.204162	0.00721547	0.297746	0.126776	-0.483764	-0.0613296	1.20291	1
665	13	Indiana	3	-0.204162	0.00721547	0.297746	0.126776	-0.483764	-0.0613296	0.202913	0
680	13	Indiana	2	-0.204162	0.00721547	0.297746	0.126776	-0.483764	-0.0613296	0.202913	1
693	13	Indiana	3	-0.204162	0.00721547	0.297746	0.126776	-0.483764	-0.0613296	-1.79709	1
695	13	Indiana	1	-0.204162	0.00721547	0.297746	0.126776	-0.483764	-0.0613296	-1.79709	0
701	13	Indiana		-0.204162	0.00721547	0.297746	0.126776	-0.483764	-0.0613296	-0.797087	1
800	13	Indiana	2	-0.204162	0.00721547	0.297746	0.126776	-0.483764	-0.0613296	1.20291	1
812	13	Indiana	3	-0.204162	0.00721547	0.297746	0.126776	-0.483764	-0.0613296	0.202913	1
818	13	Indiana	1	-0.204162	0.00721547	0.297746	0.126776	-0.483764	-0.0613296	-1.79709	1
944	13	Indiana	3	-0.204162	0.00721547	0.297746	0.126776	-0.483764	-0.0613296	-1.79709	1
951	13	Indiana	2	-0.204162	0.00721547	0.297746	0.126776	-0.483764	-0.0613296	-1.79709	1
952	13	Indiana	2	-0.204162	0.00721547	0.297746	0.126776	-0.483764	-0.0613296	-2.79709	0
958	13	Indiana	3	-0.204162	0.00721547	0.297746	0.126776	-0.483764	-0.0613296	0.202913	1
962	13	Indiana	3	-0.204162	0.00721547	0.297746	0.126776	-0.483764	-0.0613296	0.202913	1
966	13	Indiana	2	-0.204162	0.00721547	0.297746	0.126776	-0.483764	-0.0613296	-1.79709	0
967	13	Indiana	3	-0.204162	0.00721547	0.297746	0.126776	-0.483764	-0.0613296	1.20291	1
416.201	13	Indiana	2	-0.204162	0.00721547	0.297746	0.126776	-0.483764	-0.0613296	-1.79709	1
483.201	13	Indiana	3	-0.204162	0.00721547	0.297746	0.126776	-0.483764	-0.0613296	-1.79709	0
442.201	13	Indiana	2	-0.204162	0.00721547	0.297746	0.126776	-0.483764	-0.0613296	-1.79709	1
559.201	13	Indiana	2	-0.204162	0.00721547	0.297746	0.126776	-0.483764	-0.0613296	-1.79709	0
304.201	13	Indiana	2	-0.204162	0.00721547	0.297746	0.126776	-0.483764	-0.0613296	0.202913	1
550.201	13	Indiana	2	-0.204162	0.00721547	0.297746	0.126776	-0.483764	-0.0613296	0.202913	1
61.2006	13	Indiana	3	-0.204162	0.00721547	0.297746	0.126776	-0.483764	-0.0613296	-0.797087	0
131.201	13	Indiana	3	-0.204162	0.00721547	0.297746	0.126776	-0.483764	-0.0613296	0.202913	1
423.201	13	Indiana	3	-0.204162	0.00721547	0.297746	0.126776	-0.483764	-0.0613296	0.202913	1
531.201	13	Indiana	2	-0.204162	0.00721547	0.297746	0.126776	-0.483764	-0.0613296	1.20291	1
165.201	13	Indiana	1	-0.204162	0.00721547	0.297746	0.126776	-0.483764	-0.0613296	2.20291	0
170	10	Iowa	2	-0.790055	-0.661372	-0.547924	0.416156	-0.144251	-0.0600307	0.202913	1
183	10	Iowa	2	-0.790055	-0.661372	-0.547924	0.416156	-0.144251	-0.0600307	2.20291	0
502	10	Iowa	2	-0.790055	-0.661372	-0.547924	0.416156	-0.144251	-0.0600307	1.20291	0
715	10	Iowa	2	-0.790055	-0.661372	-0.547924	0.416156	-0.144251	-0.0600307	1.20291	0
70.2006	10	Iowa	3	-0.790055	-0.661372	-0.547924	0.416156	-0.144251	-0.0600307		0
70.2006	10	Iowa	3	-0.790055	-0.661372	-0.547924	0.416156	-0.144251	-0.0600307		0
248.201	10	Iowa	3	-0.790055	-0.661372	-0.547924	0.416156	-0.144251	-0.0600307	-1.79709	1
16.2006	10	Iowa	2	-0.790055	-0.661372	-0.547924	0.416156	-0.144251	-0.0600307	-1.79709	0
166.201	10	Iowa	3	-0.790055	-0.661372	-0.547924	0.416156	-0.144251	-0.0600307	-1.79709	1
214.201	10	Iowa	2	-0.790055	-0.661372	-0.547924	0.416156	-0.144251	-0.0600307	-1.79709	0
49.2006	10	Iowa	2	-0.790055	-0.661372	-0.547924	0.416156	-0.144251	-0.0600307	0.202913	0
288.201	10	Iowa	2	-0.790055	-0.661372	-0.547924	0.416156	-0.144251	-0.0600307	0.202913	1
421.201	10	Iowa	2	-0.790055	-0.661372	-0.547924	0.416156	-0.144251	-0.0600307	-0.797087	0
385.201	10	Iowa	2	-0.790055	-0.661372	-0.547924	0.416156	-0.144251	-0.0600307	0.202913	1
371.201	10	Iowa	2	-0.790055	-0.661372	-0.547924	0.416156	-0.144251	-0.0600307	0.202913	1
259.201	10	Iowa	3	-0.790055	-0.661372	-0.547924	0.416156	-0.144251	-0.0600307	1.20291	0
45.2006	10	Iowa	3	-0.790055	-0.661372	-0.547924	0.416156	-0.144251	-0.0600307	1.20291	0
272.201	10	Iowa	2	-0.790055	-0.661372	-0.547924	0.416156	-0.144251	-0.0600307	2.20291	1
122.201	10	Iowa	2	-0.790055	-0.661372	-0.547924	0.416156	-0.144251	-0.0600307	2.20291	1
115	14	Kansas	3	-0.452247	-0.253981	0.128612	0.540176	-0.301203	-0.162703	0.202913	1
176	14	Kansas	2	-0.452247	-0.253981	0.128612	0.540176	-0.301203	-0.162703	1.20291	0
201	14	Kansas	1	-0.452247	-0.253981	0.128612	0.540176	-0.301203	-0.162703	0.202913	1
438	14	Kansas	2	-0.452247	-0.253981	0.128612	0.540176	-0.301203	-0.162703	2.20291	0
510	14	Kansas	3	-0.452247	-0.253981	0.128612	0.540176	-0.301203	-0.162703	-1.79709	0
705	14	Kansas	3	-0.452247	-0.253981	0.128612	0.540176	-0.301203	-0.162703	0.202913	0
708	14	Kansas	3	-0.452247	-0.253981	0.128612	0.540176	-0.301203	-0.162703	2.20291	0
716	14	Kansas	2	-0.452247	-0.253981	0.128612	0.540176	-0.301203	-0.162703	-1.79709	0
725	14	Kansas	3	-0.452247	-0.253981	0.128612	0.540176	-0.301203	-0.162703	-1.79709	1
210.201	14	Kansas	3	-0.452247	-0.253981	0.128612	0.540176	-0.301203	-0.162703	-2.79709	0
15.2006	14	Kansas	3	-0.452247	-0.253981	0.128612	0.540176	-0.301203	-0.162703	-2.79709	0
375.201	14	Kansas	3	-0.452247	-0.253981	0.128612	0.540176	-0.301203	-0.162703	-1.79709	0
344.201	14	Kansas	3	-0.452247	-0.253981	0.128612	0.540176	-0.301203	-0.162703	0.202913	1
200.201	14	Kansas	3	-0.452247	-0.253981	0.128612	0.540176	-0.301203	-0.162703	-0.797087	1
68.2006	14	Kansas	2	-0.452247	-0.253981	0.128612	0.540176	-0.301203	-0.162703	0.202913	0
189.201	14	Kansas	2	-0.452247	-0.253981	0.128612	0.540176	-0.301203	-0.162703	0.202913	1
253.201	14	Kansas	3	-0.452247	-0.253981	0.128612	0.540176	-0.301203	-0.162703	0.202913	1
332.201	14	Kansas	3	-0.452247	-0.253981	0.128612	0.540176	-0.301203	-0.162703	0.202913	0
120.201	14	Kansas	2	-0.452247	-0.253981	0.128612	0.540176	-0.301203	-0.162703	1.20291	1
39.2006	14	Kansas	2	-0.452247	-0.253981	0.128612	0.540176	-0.301203	-0.162703	1.20291	1
281.201	14	Kansas	2	-0.452247	-0.253981	0.128612	0.540176	-0.301203	-0.162703	1.20291	1
260.201	14	Kansas	3	-0.452247	-0.253981	0.128612	0.540176	-0.301203	-0.162703	2.20291	0
79.2006	14	Kansas	3	-0.452247	-0.253981	0.128612	0.540176	-0.301203	-0.162703	2.20291	1
6	15	Kentuky	3	-0.638732	-0.516248	0.805148	-0.121264	-1.14918	0.139354	-2.79709	1
12	15	Kentuky	2	-0.638732	-0.516248	0.805148	-0.121264	-1.14918	0.139354	-1.79709	1
33	15	Kentuky	3	-0.638732	-0.516248	0.805148	-0.121264	-1.14918	0.139354	-2.79709	1
121	15	Kentuky	2	-0.638732	-0.516248	0.805148	-0.121264	-1.14918	0.139354	-0.797087	1
194	15	Kentuky	1	-0.638732	-0.516248	0.805148	-0.121264	-1.14918	0.139354	1.20291	1
203	15	Kentuky	3	-0.638732	-0.516248	0.805148	-0.121264	-1.14918	0.139354	-2.79709	0
205	15	Kentuky	3	-0.638732	-0.516248	0.805148	-0.121264	-1.14918	0.139354	2.20291	0
207	15	Kentuky	3	-0.638732	-0.516248	0.805148	-0.121264	-1.14918	0.139354	0.202913	1
208	15	Kentuky	2	-0.638732	-0.516248	0.805148	-0.121264	-1.14918	0.139354	-0.797087	0
213	15	Kentuky	2	-0.638732	-0.516248	0.805148	-0.121264	-1.14918	0.139354	-0.797087	0
541	15	Kentuky	1	-0.638732	-0.516248	0.805148	-0.121264	-1.14918	0.139354	-1.79709	0
546	15	Kentuky	3	-0.638732	-0.516248	0.805148	-0.121264	-1.14918	0.139354	-1.79709	1
552	15	Kentuky	3	-0.638732	-0.516248	0.805148	-0.121264	-1.14918	0.139354	-1.79709	1
566	15	Kentuky	3	-0.638732	-0.516248	0.805148	-0.121264	-1.14918	0.139354	0.202913	1
627	15	Kentuky	1	-0.638732	-0.516248	0.805148	-0.121264	-1.14918	0.139354	-2.79709	0
849	15	Kentuky	3	-0.638732	-0.516248	0.805148	-0.121264	-1.14918	0.139354	-1.79709	0
426.201	15	Kentuky	2	-0.638732	-0.516248	0.805148	-0.121264	-1.14918	0.139354	-1.79709	0
567.201	15	Kentuky	3	-0.638732	-0.516248	0.805148	-0.121264	-1.14918	0.139354	-1.79709	1
589.201	15	Kentuky	3	-0.638732	-0.516248	0.805148	-0.121264	-1.14918	0.139354	-1.79709	1
690.201	15	Kentuky	3	-0.638732	-0.516248	0.805148	-0.121264	-1.14918	0.139354	-1.79709	0
474.201	15	Kentuky	2	-0.638732	-0.516248	0.805148	-0.121264	-1.14918	0.139354	-1.79709	1
509.201	15	Kentuky	2	-0.638732	-0.516248	0.805148	-0.121264	-1.14918	0.139354	-1.79709	1
2.2006	15	Kentuky	2	-0.638732	-0.516248	0.805148	-0.121264	-1.14918	0.139354	0.202913	0
414.201	15	Kentuky	3	-0.638732	-0.516248	0.805148	-0.121264	-1.14918	0.139354	0.202913	1
182.201	15	Kentuky	3	-0.638732	-0.516248	0.805148	-0.121264	-1.14918	0.139354	0.202913	1
668.201	15	Kentuky	3	-0.638732	-0.516248	0.805148	-0.121264	-1.14918	0.139354	0.202913	1
217.201	15	Kentuky	1	-0.638732	-0.516248	0.805148	-0.121264	-1.14918	0.139354	1.20291	0
595.201	15	Kentuky	2	-0.638732	-0.516248	0.805148	-0.121264	-1.14918	0.139354	1.20291	1
459.201	15	Kentuky	2	-0.638732	-0.516248	0.805148	-0.121264	-1.14918	0.139354	1.20291	0
448.201	15	Kentuky	2	-0.638732	-0.516248	0.805148	-0.121264	-1.14918	0.139354	2.20291	1
492.201	15	Kentuky	2	-0.638732	-0.516248	0.805148	-0.121264	-1.14918	0.139354	2.20291	0
88	16	Louisiana	3	1.80105	1.95039	0.805148	-1.73352	-0.574566	0.996023	-2.79709	0
232	16	Louisiana	2	1.80105	1.95039	0.805148	-1.73352	-0.574566	0.996023	1.20291	0
337	16	Louisiana	2	1.80105	1.95039	0.805148	-1.73352	-0.574566	0.996023	2.20291	1
338	16	Louisiana	3	1.80105	1.95039	0.805148	-1.73352	-0.574566	0.996023	-2.79709	1
340	16	Louisiana	2	1.80105	1.95039	0.805148	-1.73352	-0.574566	0.996023	2.20291	0
343	16	Louisiana	3	1.80105	1.95039	0.805148	-1.73352	-0.574566	0.996023	1.20291	0
386	16	Louisiana	3	1.80105	1.95039	0.805148	-1.73352	-0.574566	0.996023	0.202913	1
484	16	Louisiana	2	1.80105	1.95039	0.805148	-1.73352	-0.574566	0.996023	0.202913	1
488	16	Louisiana	3	1.80105	1.95039	0.805148	-1.73352	-0.574566	0.996023	-1.79709	0
492	16	Louisiana	3	1.80105	1.95039	0.805148	-1.73352	-0.574566	0.996023	-1.79709	1
494	16	Louisiana	2	1.80105	1.95039	0.805148	-1.73352	-0.574566	0.996023	-1.79709	1
754	16	Louisiana	2	1.80105	1.95039	0.805148	-1.73352	-0.574566	0.996023	0.202913	0
860	16	Louisiana	2	1.80105	1.95039	0.805148	-1.73352	-0.574566	0.996023	2.20291	0
863	16	Louisiana	2	1.80105	1.95039	0.805148	-1.73352	-0.574566	0.996023	-1.79709	1
865	16	Louisiana	2	1.80105	1.95039	0.805148	-1.73352	-0.574566	0.996023	1.20291	0
867	16	Louisiana	3	1.80105	1.95039	0.805148	-1.73352	-0.574566	0.996023	1.20291	1
1000	16	Louisiana	3	1.80105	1.95039	0.805148	-1.73352	-0.574566	0.996023	-1.79709	1
153.201	16	Louisiana	2	1.80105	1.95039	0.805148	-1.73352	-0.574566	0.996023		0
192.201	16	Louisiana	3	1.80105	1.95039	0.805148	-1.73352	-0.574566	0.996023	-1.79709	0
404.201	16	Louisiana	3	1.80105	1.95039	0.805148	-1.73352	-0.574566	0.996023	-1.79709	1
137.201	16	Louisiana	3	1.80105	1.95039	0.805148	-1.73352	-0.574566	0.996023	-2.79709	1
170.201	16	Louisiana	3	1.80105	1.95039	0.805148	-1.73352	-0.574566	0.996023	-3.79709	0
234.201	16	Louisiana	3	1.80105	1.95039	0.805148	-1.73352	-0.574566	0.996023	-3.79709	0
237.201	16	Louisiana	3	1.80105	1.95039	0.805148	-1.73352	-0.574566	0.996023	-2.79709	0
69.2006	16	Louisiana	2	1.80105	1.95039	0.805148	-1.73352	-0.574566	0.996023	-1.79709	1
160.201	16	Louisiana	3	1.80105	1.95039	0.805148	-1.73352	-0.574566	0.996023	-1.79709	0
107.201	16	Louisiana	3	1.80105	1.95039	0.805148	-1.73352	-0.574566	0.996023	-3.79709	1
235.201	16	Louisiana		1.80105	1.95039	0.805148	-1.73352	-0.574566	0.996023	-2.79709	1
101.201	16	Louisiana	3	1.80105	1.95039	0.805148	-1.73352	-0.574566	0.996023	0.202913	0
135.201	16	Louisiana	2	1.80105	1.95039	0.805148	-1.73352	-0.574566	0.996023	0.202913	0
356.201	16	Louisiana	3	1.80105	1.95039	0.805148	-1.73352	-0.574566	0.996023	0.202913	1
389.201	16	Louisiana	2	1.80105	1.95039	0.805148	-1.73352	-0.574566	0.996023	0.202913	1
84.2006	16	Louisiana	2	1.80105	1.95039	0.805148	-1.73352	-0.574566	0.996023	0.202913	1
188.201	16	Louisiana	2	1.80105	1.95039	0.805148	-1.73352	-0.574566	0.996023	0.202913	0
222.201	16	Louisiana	3	1.80105	1.95039	0.805148	-1.73352	-0.574566	0.996023	0.202913	0
247.201	16	Louisiana	3	1.80105	1.95039	0.805148	-1.73352	-0.574566	0.996023	0.202913	1
66.2006	16	Louisiana		1.80105	1.95039	0.805148	-1.73352	-0.574566	0.996023	0.202913	1
117.201	16	Louisiana	2	1.80105	1.95039	0.805148	-1.73352	-0.574566	0.996023	1.20291	1
300.201	16	Louisiana	3	1.80105	1.95039	0.805148	-1.73352	-0.574566	0.996023	1.20291	1
232.201	16	Louisiana	2	1.80105	1.95039	0.805148	-1.73352	-0.574566	0.996023	1.20291	0
341.201	16	Louisiana	2	1.80105	1.95039	0.805148	-1.73352	-0.574566	0.996023	1.20291	1
405.201	16	Louisiana	1	1.80105	1.95039	0.805148	-1.73352	-0.574566	0.996023	1.20291	1
89.2006	16	Louisiana	2	1.80105	1.95039	0.805148	-1.73352	-0.574566	0.996023	2.20291	1
164.201	16	Louisiana	2	1.80105	1.95039	0.805148	-1.73352	-0.574566	0.996023	2.20291	1
386.201	16	Louisiana	2	1.80105	1.95039	0.805148	-1.73352	-0.574566	0.996023	2.20291	0
37	19	Maine	2	-1.46361	-1.58453	-1.30903	1.32564	-0.556175	-0.737286	-1.79709	0
408	19	Maine	2	-1.46361	-1.58453	-1.30903	1.32564	-0.556175	-0.737286	-1.79709	1
416	19	Maine	1	-1.46361	-1.58453	-1.30903	1.32564	-0.556175	-0.737286	0.202913	0
776	19	Maine	2	-1.46361	-1.58453	-1.30903	1.32564	-0.556175	-0.737286	-1.79709	0
631.201	19	Maine	2	-1.46361	-1.58453	-1.30903	1.32564	-0.556175	-0.737286	-1.79709	0
1.2006	19	Maine	2	-1.46361	-1.58453	-1.30903	1.32564	-0.556175	-0.737286	-1.79709	0
600.201	19	Maine	1	-1.46361	-1.58453	-1.30903	1.32564	-0.556175	-0.737286	-1.79709	1
687.201	19	Maine	2	-1.46361	-1.58453	-1.30903	1.32564	-0.556175	-0.737286	-1.79709	0
627.201	19	Maine	1	-1.46361	-1.58453	-1.30903	1.32564	-0.556175	-0.737286	0.202913	0
645.201	19	Maine	3	-1.46361	-1.58453	-1.30903	1.32564	-0.556175	-0.737286	0.202913	1
542.201	19	Maine	3	-1.46361	-1.58453	-1.30903	1.32564	-0.556175	-0.737286	1.20291	1
630.201	19	Maine	2	-1.46361	-1.58453	-1.30903	1.32564	-0.556175	-0.737286	1.20291	0
555.201	19	Maine	3	-1.46361	-1.58453	-1.30903	1.32564	-0.556175	-0.737286	1.20291	0
607.201	19	Maine	2	-1.46361	-1.58453	-1.30903	1.32564	-0.556175	-0.737286	1.20291	1
31	18	Maryland	1	1.0005	0.705055	-0.632491	-0.534664	1.42162	-0.760086	1.20291	1
74	18	Maryland	2	1.0005	0.705055	-0.632491	-0.534664	1.42162	-0.760086	-1.79709	0
81	18	Maryland	2	1.0005	0.705055	-0.632491	-0.534664	1.42162	-0.760086	0.202913	1
128	18	Maryland	3	1.0005	0.705055	-0.632491	-0.534664	1.42162	-0.760086	0.202913	1
132	18	Maryland	2	1.0005	0.705055	-0.632491	-0.534664	1.42162	-0.760086	1.20291	0
141	18	Maryland	2	1.0005	0.705055	-0.632491	-0.534664	1.42162	-0.760086	1.20291	1
163	18	Maryland	2	1.0005	0.705055	-0.632491	-0.534664	1.42162	-0.760086	-1.79709	0
268	18	Maryland	3	1.0005	0.705055	-0.632491	-0.534664	1.42162	-0.760086	-1.79709	0
276	18	Maryland	2	1.0005	0.705055	-0.632491	-0.534664	1.42162	-0.760086	1.20291	0
372	18	Maryland	2	1.0005	0.705055	-0.632491	-0.534664	1.42162	-0.760086	0.202913	0
376	18	Maryland	3	1.0005	0.705055	-0.632491	-0.534664	1.42162	-0.760086	0.202913	0
434	18	Maryland	2	1.0005	0.705055	-0.632491	-0.534664	1.42162	-0.760086	0.202913	1
444	18	Maryland	2	1.0005	0.705055	-0.632491	-0.534664	1.42162	-0.760086	1.20291	1
586	18	Maryland	2	1.0005	0.705055	-0.632491	-0.534664	1.42162	-0.760086	2.20291	0
723	18	Maryland	2	1.0005	0.705055	-0.632491	-0.534664	1.42162	-0.760086	-1.79709	0
820	18	Maryland	3	1.0005	0.705055	-0.632491	-0.534664	1.42162	-0.760086	0.202913	1
822	18	Maryland	3	1.0005	0.705055	-0.632491	-0.534664	1.42162	-0.760086	1.20291	0
842	18	Maryland	3	1.0005	0.705055	-0.632491	-0.534664	1.42162	-0.760086	0.202913	0
848	18	Maryland	2	1.0005	0.705055	-0.632491	-0.534664	1.42162	-0.760086	2.20291	1
974	18	Maryland	2	1.0005	0.705055	-0.632491	-0.534664	1.42162	-0.760086	1.20291	0
995	18	Maryland	3	1.0005	0.705055	-0.632491	-0.534664	1.42162	-0.760086	0.202913	1
695.201	18	Maryland	2	1.0005	0.705055	-0.632491	-0.534664	1.42162	-0.760086	-1.79709	1
495.201	18	Maryland	3	1.0005	0.705055	-0.632491	-0.534664	1.42162	-0.760086	-3.79709	0
691.201	18	Maryland	3	1.0005	0.705055	-0.632491	-0.534664	1.42162	-0.760086	0.202913	0
759.201	18	Maryland	2	1.0005	0.705055	-0.632491	-0.534664	1.42162	-0.760086	0.202913	0
430.201	18	Maryland	3	1.0005	0.705055	-0.632491	-0.534664	1.42162	-0.760086	0.202913	0
720.201	18	Maryland	2	1.0005	0.705055	-0.632491	-0.534664	1.42162	-0.760086	-0.797087	1
648.201	18	Maryland	3	1.0005	0.705055	-0.632491	-0.534664	1.42162	-0.760086	0.202913	1
614.201	18	Maryland	2	1.0005	0.705055	-0.632491	-0.534664	1.42162	-0.760086	1.20291	1
711.201	18	Maryland	2	1.0005	0.705055	-0.632491	-0.534664	1.42162	-0.760086	1.20291	1
758.201	18	Maryland	3	1.0005	0.705055	-0.632491	-0.534664	1.42162	-0.760086	1.20291	1
760.201	18	Maryland	1	1.0005	0.705055	-0.632491	-0.534664	1.42162	-0.760086	1.20291	1
710.201	18	Maryland	2	1.0005	0.705055	-0.632491	-0.534664	1.42162	-0.760086	1.20291	0
500.201	18	Maryland	2	1.0005	0.705055	-0.632491	-0.534664	1.42162	-0.760086	2.20291	1
575.201	18	Maryland	3	1.0005	0.705055	-0.632491	-0.534664	1.42162	-0.760086	2.20291	0
1	17	Massachusetts	2	-0.661184	-0.987097	-1.47816	-0.617344	1.56686	-0.967294	2.20291	0
19	17	Massachusetts	2	-0.661184	-0.987097	-1.47816	-0.617344	1.56686	-0.967294	0.202913	0
34	17	Massachusetts	2	-0.661184	-0.987097	-1.47816	-0.617344	1.56686	-0.967294	0.202913	1
36	17	Massachusetts	2	-0.661184	-0.987097	-1.47816	-0.617344	1.56686	-0.967294	-1.79709	1
171	17	Massachusetts	2	-0.661184	-0.987097	-1.47816	-0.617344	1.56686	-0.967294	0.202913	1
172	17	Massachusetts	2	-0.661184	-0.987097	-1.47816	-0.617344	1.56686	-0.967294	2.20291	1
175	17	Massachusetts	2	-0.661184	-0.987097	-1.47816	-0.617344	1.56686	-0.967294	1.20291	1
177	17	Massachusetts	1	-0.661184	-0.987097	-1.47816	-0.617344	1.56686	-0.967294	-2.79709	0
377	17	Massachusetts	2	-0.661184	-0.987097	-1.47816	-0.617344	1.56686	-0.967294	2.20291	0
381	17	Massachusetts	1	-0.661184	-0.987097	-1.47816	-0.617344	1.56686	-0.967294	0.202913	1
385	17	Massachusetts	2	-0.661184	-0.987097	-1.47816	-0.617344	1.56686	-0.967294	1.20291	0
405	17	Massachusetts	1	-0.661184	-0.987097	-1.47816	-0.617344	1.56686	-0.967294	2.20291	1
415	17	Massachusetts	3	-0.661184	-0.987097	-1.47816	-0.617344	1.56686	-0.967294	0.202913	0
417	17	Massachusetts	3	-0.661184	-0.987097	-1.47816	-0.617344	1.56686	-0.967294	2.20291	1
571	17	Massachusetts	2	-0.661184	-0.987097	-1.47816	-0.617344	1.56686	-0.967294	1.20291	1
572	17	Massachusetts	2	-0.661184	-0.987097	-1.47816	-0.617344	1.56686	-0.967294	1.20291	1
574	17	Massachusetts	1	-0.661184	-0.987097	-1.47816	-0.617344	1.56686	-0.967294	-2.79709	1
576	17	Massachusetts	2	-0.661184	-0.987097	-1.47816	-0.617344	1.56686	-0.967294	0.202913	0
641	17	Massachusetts		-0.661184	-0.987097	-1.47816	-0.617344	1.56686	-0.967294	0.202913	1
650	17	Massachusetts	3	-0.661184	-0.987097	-1.47816	-0.617344	1.56686	-0.967294	-1.79709	1
651	17	Massachusetts	2	-0.661184	-0.987097	-1.47816	-0.617344	1.56686	-0.967294	2.20291	0
767	17	Massachusetts	3	-0.661184	-0.987097	-1.47816	-0.617344	1.56686	-0.967294	-1.79709	1
770	17	Massachusetts	2	-0.661184	-0.987097	-1.47816	-0.617344	1.56686	-0.967294	1.20291	0
771	17	Massachusetts	1	-0.661184	-0.987097	-1.47816	-0.617344	1.56686	-0.967294	-2.79709	0
775	17	Massachusetts	1	-0.661184	-0.987097	-1.47816	-0.617344	1.56686	-0.967294	2.20291	0
779	17	Massachusetts	3	-0.661184	-0.987097	-1.47816	-0.617344	1.56686	-0.967294	-1.79709	1
780	17	Massachusetts	2	-0.661184	-0.987097	-1.47816	-0.617344	1.56686	-0.967294	1.20291	0
781	17	Massachusetts	2	-0.661184	-0.987097	-1.47816	-0.617344	1.56686	-0.967294	1.20291	0
3.2006	17	Massachusetts	1	-0.661184	-0.987097	-1.47816	-0.617344	1.56686	-0.967294	-1.79709	0
596.201	17	Massachusetts	3	-0.661184	-0.987097	-1.47816	-0.617344	1.56686	-0.967294	-1.79709	1
678.201	17	Massachusetts	2	-0.661184	-0.987097	-1.47816	-0.617344	1.56686	-0.967294	-1.79709	0
679.201	17	Massachusetts	3	-0.661184	-0.987097	-1.47816	-0.617344	1.56686	-0.967294	-1.79709	0
737.201	17	Massachusetts	3	-0.661184	-0.987097	-1.47816	-0.617344	1.56686	-0.967294	-2.79709	0
761.201	17	Massachusetts	2	-0.661184	-0.987097	-1.47816	-0.617344	1.56686	-0.967294	-1.79709	1
578.201	17	Massachusetts	1	-0.661184	-0.987097	-1.47816	-0.617344	1.56686	-0.967294	-1.79709	1
731.201	17	Massachusetts	2	-0.661184	-0.987097	-1.47816	-0.617344	1.56686	-0.967294	-1.79709	0
585.201	17	Massachusetts	3	-0.661184	-0.987097	-1.47816	-0.617344	1.56686	-0.967294	-1.79709	1
734.201	17	Massachusetts	1	-0.661184	-0.987097	-1.47816	-0.617344	1.56686	-0.967294	0.202913	1
544.201	17	Massachusetts	3	-0.661184	-0.987097	-1.47816	-0.617344	1.56686	-0.967294	0.202913	1
573.201	17	Massachusetts	1	-0.661184	-0.987097	-1.47816	-0.617344	1.56686	-0.967294	0.202913	0
470.201	17	Massachusetts	3	-0.661184	-0.987097	-1.47816	-0.617344	1.56686	-0.967294	0.202913	0
637.201	17	Massachusetts	2	-0.661184	-0.987097	-1.47816	-0.617344	1.56686	-0.967294	0.202913	1
696.201	17	Massachusetts	2	-0.661184	-0.987097	-1.47816	-0.617344	1.56686	-0.967294	0.202913	0
702.201	17	Massachusetts	1	-0.661184	-0.987097	-1.47816	-0.617344	1.56686	-0.967294	0.202913	1
586.201	17	Massachusetts	2	-0.661184	-0.987097	-1.47816	-0.617344	1.56686	-0.967294	1.20291	0
721.201	17	Massachusetts	2	-0.661184	-0.987097	-1.47816	-0.617344	1.56686	-0.967294	1.20291	1
723.201	17	Massachusetts	2	-0.661184	-0.987097	-1.47816	-0.617344	1.56686	-0.967294	1.20291	0
618.201	17	Massachusetts	3	-0.661184	-0.987097	-1.47816	-0.617344	1.56686	-0.967294	1.20291	1
727.201	17	Massachusetts	2	-0.661184	-0.987097	-1.47816	-0.617344	1.56686	-0.967294	1.20291	0
767.201	17	Massachusetts	3	-0.661184	-0.987097	-1.47816	-0.617344	1.56686	-0.967294	1.20291	1
569.201	17	Massachusetts	3	-0.661184	-0.987097	-1.47816	-0.617344	1.56686	-0.967294	1.20291	0
588.201	17	Massachusetts	3	-0.661184	-0.987097	-1.47816	-0.617344	1.56686	-0.967294	1.20291	1
608.201	17	Massachusetts	2	-0.661184	-0.987097	-1.47816	-0.617344	1.56686	-0.967294	1.20291	0
750.201	17	Massachusetts	3	-0.661184	-0.987097	-1.47816	-0.617344	1.56686	-0.967294	1.20291	0
528.201	17	Massachusetts	2	-0.661184	-0.987097	-1.47816	-0.617344	1.56686	-0.967294	2.20291	0
560.201	17	Massachusetts	2	-0.661184	-0.987097	-1.47816	-0.617344	1.56686	-0.967294	2.20291	0
772.201	17	Massachusetts		-0.661184	-0.987097	-1.47816	-0.617344	1.56686	-0.967294	2.20291	1
786.201	17	Massachusetts	2	-0.661184	-0.987097	-1.47816	-0.617344	1.56686	-0.967294	2.20291	1
506.201	17	Massachusetts	2	-0.661184	-0.987097	-1.47816	-0.617344	1.56686	-0.967294	2.20291	0
9	20	Michigan	2	0.266645	0.724266	-0.632491	1.22229	-0.316037	-0.386287	1.20291	1
63	20	Michigan	3	0.266645	0.724266	-0.632491	1.22229	-0.316037	-0.386287	2.20291	0
66	20	Michigan	3	0.266645	0.724266	-0.632491	1.22229	-0.316037	-0.386287	0.202913	1
142	20	Michigan	3	0.266645	0.724266	-0.632491	1.22229	-0.316037	-0.386287	2.20291	0
147	20	Michigan	3	0.266645	0.724266	-0.632491	1.22229	-0.316037	-0.386287	-2.79709	0
151	20	Michigan	3	0.266645	0.724266	-0.632491	1.22229	-0.316037	-0.386287	0.202913	1
291	20	Michigan	1	0.266645	0.724266	-0.632491	1.22229	-0.316037	-0.386287	2.20291	1
294	20	Michigan	3	0.266645	0.724266	-0.632491	1.22229	-0.316037	-0.386287	2.20291	1
296	20	Michigan	2	0.266645	0.724266	-0.632491	1.22229	-0.316037	-0.386287	-2.79709	0
302	20	Michigan	3	0.266645	0.724266	-0.632491	1.22229	-0.316037	-0.386287	-2.79709	1
441	20	Michigan	3	0.266645	0.724266	-0.632491	1.22229	-0.316037	-0.386287	2.20291	1
448	20	Michigan	1	0.266645	0.724266	-0.632491	1.22229	-0.316037	-0.386287	-1.79709	1
573	20	Michigan	3	0.266645	0.724266	-0.632491	1.22229	-0.316037	-0.386287	2.20291	1
579	20	Michigan	2	0.266645	0.724266	-0.632491	1.22229	-0.316037	-0.386287	1.20291	0
585	20	Michigan	2	0.266645	0.724266	-0.632491	1.22229	-0.316037	-0.386287	2.20291	0
587	20	Michigan	2	0.266645	0.724266	-0.632491	1.22229	-0.316037	-0.386287	1.20291	0
605	20	Michigan	2	0.266645	0.724266	-0.632491	1.22229	-0.316037	-0.386287	2.20291	1
647	20	Michigan	2	0.266645	0.724266	-0.632491	1.22229	-0.316037	-0.386287	1.20291	1
670	20	Michigan	1	0.266645	0.724266	-0.632491	1.22229	-0.316037	-0.386287	-1.79709	1
686	20	Michigan	2	0.266645	0.724266	-0.632491	1.22229	-0.316037	-0.386287	1.20291	0
698	20	Michigan	2	0.266645	0.724266	-0.632491	1.22229	-0.316037	-0.386287	1.20291	1
710	20	Michigan	2	0.266645	0.724266	-0.632491	1.22229	-0.316037	-0.386287	-1.79709	1
797	20	Michigan	1	0.266645	0.724266	-0.632491	1.22229	-0.316037	-0.386287	2.20291	0
801	20	Michigan	1	0.266645	0.724266	-0.632491	1.22229	-0.316037	-0.386287	2.20291	0
805	20	Michigan	2	0.266645	0.724266	-0.632491	1.22229	-0.316037	-0.386287	0.202913	0
819	20	Michigan	3	0.266645	0.724266	-0.632491	1.22229	-0.316037	-0.386287	1.20291	1
949	20	Michigan	2	0.266645	0.724266	-0.632491	1.22229	-0.316037	-0.386287	0.202913	1
957	20	Michigan	2	0.266645	0.724266	-0.632491	1.22229	-0.316037	-0.386287	1.20291	0
959	20	Michigan	2	0.266645	0.724266	-0.632491	1.22229	-0.316037	-0.386287	-1.79709	0
965	20	Michigan	3	0.266645	0.724266	-0.632491	1.22229	-0.316037	-0.386287	2.20291	1
968	20	Michigan	2	0.266645	0.724266	-0.632491	1.22229	-0.316037	-0.386287	1.20291	0
970	20	Michigan	1	0.266645	0.724266	-0.632491	1.22229	-0.316037	-0.386287	0.202913	0
494.201	20	Michigan	2	0.266645	0.724266	-0.632491	1.22229	-0.316037	-0.386287	-1.79709	0
529.201	20	Michigan	3	0.266645	0.724266	-0.632491	1.22229	-0.316037	-0.386287	-1.79709	0
545.201	20	Michigan	3	0.266645	0.724266	-0.632491	1.22229	-0.316037	-0.386287	0.202913	1
558.201	20	Michigan	3	0.266645	0.724266	-0.632491	1.22229	-0.316037	-0.386287	0.202913	1
527.201	20	Michigan	2	0.266645	0.724266	-0.632491	1.22229	-0.316037	-0.386287	0.202913	0
443.201	20	Michigan	2	0.266645	0.724266	-0.632491	1.22229	-0.316037	-0.386287	1.20291	0
460.201	20	Michigan	2	0.266645	0.724266	-0.632491	1.22229	-0.316037	-0.386287	2.20291	0
475.201	20	Michigan	2	0.266645	0.724266	-0.632491	1.22229	-0.316037	-0.386287	2.20291	1
491.201	20	Michigan	2	0.266645	0.724266	-0.632491	1.22229	-0.316037	-0.386287	2.20291	1
25	21	Minnesota	2	-0.764509	-0.823632	-1.13989	1.26363	0.87721	1.10846	-1.79709	0
190	21	Minnesota	1	-0.764509	-0.823632	-1.13989	1.26363	0.87721	1.10846	-1.79709	1
192	21	Minnesota	2	-0.764509	-0.823632	-1.13989	1.26363	0.87721	1.10846	-3.79709	0
198	21	Minnesota	2	-0.764509	-0.823632	-1.13989	1.26363	0.87721	1.10846	0.202913	1
428	21	Minnesota	2	-0.764509	-0.823632	-1.13989	1.26363	0.87721	1.10846	0.202913	1
430	21	Minnesota	2	-0.764509	-0.823632	-1.13989	1.26363	0.87721	1.10846	0.202913	1
435	21	Minnesota	3	-0.764509	-0.823632	-1.13989	1.26363	0.87721	1.10846	-1.79709	0
436	21	Minnesota	3	-0.764509	-0.823632	-1.13989	1.26363	0.87721	1.10846	0.202913	1
442	21	Minnesota	3	-0.764509	-0.823632	-1.13989	1.26363	0.87721	1.10846	0.202913	1
489	21	Minnesota	3	-0.764509	-0.823632	-1.13989	1.26363	0.87721	1.10846	-1.79709	0
496	21	Minnesota	1	-0.764509	-0.823632	-1.13989	1.26363	0.87721	1.10846	-1.79709	0
525	21	Minnesota	2	-0.764509	-0.823632	-1.13989	1.26363	0.87721	1.10846	1.20291	0
621	21	Minnesota	3	-0.764509	-0.823632	-1.13989	1.26363	0.87721	1.10846	1.20291	1
714	21	Minnesota	3	-0.764509	-0.823632	-1.13989	1.26363	0.87721	1.10846	-2.79709	0
717	21	Minnesota	2	-0.764509	-0.823632	-1.13989	1.26363	0.87721	1.10846	1.20291	0
719	21	Minnesota	3	-0.764509	-0.823632	-1.13989	1.26363	0.87721	1.10846		0
731	21	Minnesota	2	-0.764509	-0.823632	-1.13989	1.26363	0.87721	1.10846	1.20291	0
973	21	Minnesota	2	-0.764509	-0.823632	-1.13989	1.26363	0.87721	1.10846	-1.79709	0
310.201	21	Minnesota	3	-0.764509	-0.823632	-1.13989	1.26363	0.87721	1.10846	-1.79709	1
239.201	21	Minnesota	3	-0.764509	-0.823632	-1.13989	1.26363	0.87721	1.10846	-1.79709	1
136.201	21	Minnesota	2	-0.764509	-0.823632	-1.13989	1.26363	0.87721	1.10846	-1.79709	1
59.2006	21	Minnesota	2	-0.764509	-0.823632	-1.13989	1.26363	0.87721	1.10846	0.202913	0
265.201	21	Minnesota	3	-0.764509	-0.823632	-1.13989	1.26363	0.87721	1.10846	0.202913	1
335.201	21	Minnesota	2	-0.764509	-0.823632	-1.13989	1.26363	0.87721	1.10846	0.202913	0
21.2006	21	Minnesota	3	-0.764509	-0.823632	-1.13989	1.26363	0.87721	1.10846	0.202913	0
65.2006	21	Minnesota	2	-0.764509	-0.823632	-1.13989	1.26363	0.87721	1.10846	0.202913	1
291.201	21	Minnesota	3	-0.764509	-0.823632	-1.13989	1.26363	0.87721	1.10846	0.202913	0
103.201	21	Minnesota	3	-0.764509	-0.823632	-1.13989	1.26363	0.87721	1.10846	0.202913	0
358.201	21	Minnesota	3	-0.764509	-0.823632	-1.13989	1.26363	0.87721	1.10846	0.202913	0
224.201	21	Minnesota	2	-0.764509	-0.823632	-1.13989	1.26363	0.87721	1.10846	1.20291	1
262.201	21	Minnesota	2	-0.764509	-0.823632	-1.13989	1.26363	0.87721	1.10846	1.20291	1
27.2006	21	Minnesota	3	-0.764509	-0.823632	-1.13989	1.26363	0.87721	1.10846	1.20291	1
243.201	21	Minnesota	3	-0.764509	-0.823632	-1.13989	1.26363	0.87721	1.10846	1.20291	1
348.201	21	Minnesota	2	-0.764509	-0.823632	-1.13989	1.26363	0.87721	1.10846	1.20291	0
349.201	21	Minnesota	2	-0.764509	-0.823632	-1.13989	1.26363	0.87721	1.10846	1.20291	0
100.201	21	Minnesota	2	-0.764509	-0.823632	-1.13989	1.26363	0.87721	1.10846	2.20291	1
116	23	Mississippi	2	2.63503	2.84362	1.81995	-0.948064	-1.71311	1.62413	2.20291	0
120	23	Mississippi		2.63503	2.84362	1.81995	-0.948064	-1.71311	1.62413	-1.79709	0
212	23	Mississippi	3	2.63503	2.84362	1.81995	-0.948064	-1.71311	1.62413	1.20291	1
551	23	Mississippi	1	2.63503	2.84362	1.81995	-0.948064	-1.71311	1.62413	2.20291	0
554	23	Mississippi	2	2.63503	2.84362	1.81995	-0.948064	-1.71311	1.62413	2.20291	1
745	23	Mississippi	2	2.63503	2.84362	1.81995	-0.948064	-1.71311	1.62413	-1.79709	1
851	23	Mississippi	2	2.63503	2.84362	1.81995	-0.948064	-1.71311	1.62413	2.20291	1
855	23	Mississippi	2	2.63503	2.84362	1.81995	-0.948064	-1.71311	1.62413	0.202913	0
856	23	Mississippi	3	2.63503	2.84362	1.81995	-0.948064	-1.71311	1.62413	1.20291	0
198.201	23	Mississippi	3	2.63503	2.84362	1.81995	-0.948064	-1.71311	1.62413	-2.79709	1
95.2006	23	Mississippi	2	2.63503	2.84362	1.81995	-0.948064	-1.71311	1.62413	-1.79709	0
365.201	23	Mississippi	3	2.63503	2.84362	1.81995	-0.948064	-1.71311	1.62413	-1.79709	0
383.201	23	Mississippi	2	2.63503	2.84362	1.81995	-0.948064	-1.71311	1.62413	-1.79709	1
221.201	23	Mississippi	1	2.63503	2.84362	1.81995	-0.948064	-1.71311	1.62413	-1.79709	1
411.201	23	Mississippi	3	2.63503	2.84362	1.81995	-0.948064	-1.71311	1.62413	-2.79709	0
393.201	23	Mississippi	3	2.63503	2.84362	1.81995	-0.948064	-1.71311	1.62413	-1.79709	0
31.2006	23	Mississippi	3	2.63503	2.84362	1.81995	-0.948064	-1.71311	1.62413	0.202913	0
397.201	23	Mississippi	3	2.63503	2.84362	1.81995	-0.948064	-1.71311	1.62413	0.202913	1
127.201	23	Mississippi	2	2.63503	2.84362	1.81995	-0.948064	-1.71311	1.62413	1.20291	1
174.201	23	Mississippi	2	2.63503	2.84362	1.81995	-0.948064	-1.71311	1.62413	1.20291	0
362.201	23	Mississippi	3	2.63503	2.84362	1.81995	-0.948064	-1.71311	1.62413	1.20291	0
110.201	23	Mississippi	2	2.63503	2.84362	1.81995	-0.948064	-1.71311	1.62413	2.20291	0
4	22	Missouri	2	0.492739	0.590121	0.213179	0.064766	-0.450188	-0.0291569	2.20291	0
10	22	Missouri	2	0.492739	0.590121	0.213179	0.064766	-0.450188	-0.0291569	1.20291	0
26	22	Missouri		0.492739	0.590121	0.213179	0.064766	-0.450188	-0.0291569	-1.79709	0
42	22	Missouri	3	0.492739	0.590121	0.213179	0.064766	-0.450188	-0.0291569	-1.79709	0
104	22	Missouri	3	0.492739	0.590121	0.213179	0.064766	-0.450188	-0.0291569	-1.79709	1
107	22	Missouri	2	0.492739	0.590121	0.213179	0.064766	-0.450188	-0.0291569	0.202913	1
112	22	Missouri	3	0.492739	0.590121	0.213179	0.064766	-0.450188	-0.0291569	1.20291	1
186	22	Missouri	2	0.492739	0.590121	0.213179	0.064766	-0.450188	-0.0291569	1.20291	1
188	22	Missouri	3	0.492739	0.590121	0.213179	0.064766	-0.450188	-0.0291569	0.202913	0
197	22	Missouri	2	0.492739	0.590121	0.213179	0.064766	-0.450188	-0.0291569	0.202913	1
427	22	Missouri	3	0.492739	0.590121	0.213179	0.064766	-0.450188	-0.0291569	1.20291	0
440	22	Missouri	2	0.492739	0.590121	0.213179	0.064766	-0.450188	-0.0291569	0.202913	0
514	22	Missouri	3	0.492739	0.590121	0.213179	0.064766	-0.450188	-0.0291569	0.202913	1
519	22	Missouri	3	0.492739	0.590121	0.213179	0.064766	-0.450188	-0.0291569	1.20291	0
531	22	Missouri	3	0.492739	0.590121	0.213179	0.064766	-0.450188	-0.0291569	-1.79709	1
606	22	Missouri	2	0.492739	0.590121	0.213179	0.064766	-0.450188	-0.0291569	1.20291	1
608	22	Missouri	2	0.492739	0.590121	0.213179	0.064766	-0.450188	-0.0291569	-1.79709	1
709	22	Missouri	1	0.492739	0.590121	0.213179	0.064766	-0.450188	-0.0291569	1.20291	1
711	22	Missouri	3	0.492739	0.590121	0.213179	0.064766	-0.450188	-0.0291569	-1.79709	1
720	22	Missouri	2	0.492739	0.590121	0.213179	0.064766	-0.450188	-0.0291569	-1.79709	0
729	22	Missouri	2	0.492739	0.590121	0.213179	0.064766	-0.450188	-0.0291569	0.202913	1
971	22	Missouri	2	0.492739	0.590121	0.213179	0.064766	-0.450188	-0.0291569	0.202913	0
345.201	22	Missouri	2	0.492739	0.590121	0.213179	0.064766	-0.450188	-0.0291569	-1.79709	0
34.2006	22	Missouri	2	0.492739	0.590121	0.213179	0.064766	-0.450188	-0.0291569	-1.79709	1
319.201	22	Missouri	1	0.492739	0.590121	0.213179	0.064766	-0.450188	-0.0291569	-1.79709	1
328.201	22	Missouri	2	0.492739	0.590121	0.213179	0.064766	-0.450188	-0.0291569	-2.79709	0
361.201	22	Missouri	2	0.492739	0.590121	0.213179	0.064766	-0.450188	-0.0291569	-1.79709	1
154.201	22	Missouri	3	0.492739	0.590121	0.213179	0.064766	-0.450188	-0.0291569	-1.79709	0
280.201	22	Missouri	2	0.492739	0.590121	0.213179	0.064766	-0.450188	-0.0291569	-1.79709	1
50.2006	22	Missouri	3	0.492739	0.590121	0.213179	0.064766	-0.450188	-0.0291569	-1.79709	1
119.201	22	Missouri	3	0.492739	0.590121	0.213179	0.064766	-0.450188	-0.0291569	-1.79709	1
220.201	22	Missouri	3	0.492739	0.590121	0.213179	0.064766	-0.450188	-0.0291569	-1.79709	1
233.201	22	Missouri	2	0.492739	0.590121	0.213179	0.064766	-0.450188	-0.0291569	-3.79709	0
370.201	22	Missouri	2	0.492739	0.590121	0.213179	0.064766	-0.450188	-0.0291569	-3.79709	0
226.201	22	Missouri	2	0.492739	0.590121	0.213179	0.064766	-0.450188	-0.0291569	0.202913	0
314.201	22	Missouri	2	0.492739	0.590121	0.213179	0.064766	-0.450188	-0.0291569	0.202913	0
53.2006	22	Missouri	3	0.492739	0.590121	0.213179	0.064766	-0.450188	-0.0291569	0.202913	1
298.201	22	Missouri	3	0.492739	0.590121	0.213179	0.064766	-0.450188	-0.0291569	0.202913	1
360.201	22	Missouri	3	0.492739	0.590121	0.213179	0.064766	-0.450188	-0.0291569	0.202913	0
20.2006	22	Missouri	2	0.492739	0.590121	0.213179	0.064766	-0.450188	-0.0291569	0.202913	0
121.201	22	Missouri	3	0.492739	0.590121	0.213179	0.064766	-0.450188	-0.0291569	0.202913	1
197.201	22	Missouri	3	0.492739	0.590121	0.213179	0.064766	-0.450188	-0.0291569	0.202913	0
368.201	22	Missouri	2	0.492739	0.590121	0.213179	0.064766	-0.450188	-0.0291569	0.202913	1
38.2006	22	Missouri	3	0.492739	0.590121	0.213179	0.064766	-0.450188	-0.0291569	1.20291	0
258.201	22	Missouri	2	0.492739	0.590121	0.213179	0.064766	-0.450188	-0.0291569	1.20291	1
64.2006	22	Missouri	3	0.492739	0.590121	0.213179	0.064766	-0.450188	-0.0291569	1.20291	0
336.201	22	Missouri	2	0.492739	0.590121	0.213179	0.064766	-0.450188	-0.0291569	1.20291	1
415.201	22	Missouri	2	0.492739	0.590121	0.213179	0.064766	-0.450188	-0.0291569	2.20291	1
168.201	22	Missouri	2	0.492739	0.590121	0.213179	0.064766	-0.450188	-0.0291569	2.20291	0
215.201	22	Missouri	2	0.492739	0.590121	0.213179	0.064766	-0.450188	-0.0291569	2.20291	0
90.2006	22	Missouri	3	0.492739	0.590121	0.213179	0.064766	-0.450188	-0.0291569	2.20291	0
141.201	22	Missouri	2	0.492739	0.590121	0.213179	0.064766	-0.450188	-0.0291569	2.20291	0
15	24	Montana	2	-1.0946	-0.925312	-0.37879	1.53234	-1.04219	-1.59699	1.20291	1
16	24	Montana	2	-1.0946	-0.925312	-0.37879	1.53234	-1.04219	-1.59699	0.202913	1
47	24	Montana	2	-1.0946	-0.925312	-0.37879	1.53234	-1.04219	-1.59699	1.20291	0
51	24	Montana		-1.0946	-0.925312	-0.37879	1.53234	-1.04219	-1.59699	-1.79709	1
834.201	24	Montana	2	-1.0946	-0.925312	-0.37879	1.53234	-1.04219	-1.59699	-2.79709	1
789.201	24	Montana	2	-1.0946	-0.925312	-0.37879	1.53234	-1.04219	-1.59699	-1.79709	0
863.201	24	Montana	2	-1.0946	-0.925312	-0.37879	1.53234	-1.04219	-1.59699	-2.79709	1
836.201	24	Montana	2	-1.0946	-0.925312	-0.37879	1.53234	-1.04219	-1.59699	0.202913	1
879.201	24	Montana	1	-1.0946	-0.925312	-0.37879	1.53234	-1.04219	-1.59699	0.202913	0
790.201	24	Montana	3	-1.0946	-0.925312	-0.37879	1.53234	-1.04219	-1.59699	0.202913	1
860.201	24	Montana	3	-1.0946	-0.925312	-0.37879	1.53234	-1.04219	-1.59699	0.202913	0
847.201	24	Montana	3	-1.0946	-0.925312	-0.37879	1.53234	-1.04219	-1.59699	1.20291	1
828.201	24	Montana	2	-1.0946	-0.925312	-0.37879	1.53234	-1.04219	-1.59699	1.20291	1
827.201	24	Montana	2	-1.0946	-0.925312	-0.37879	1.53234	-1.04219	-1.59699	1.20291	1
196	27	Nebraska	2	-0.566646	-0.408476	-0.463357	0.333476	0.0558887	0.0186375	1.20291	1
433	27	Nebraska	2	-0.566646	-0.408476	-0.463357	0.333476	0.0558887	0.0186375	1.20291	1
500	27	Nebraska	2	-0.566646	-0.408476	-0.463357	0.333476	0.0558887	0.0186375	0.202913	0
706	27	Nebraska	3	-0.566646	-0.408476	-0.463357	0.333476	0.0558887	0.0186375	0.202913	1
266.201	27	Nebraska	3	-0.566646	-0.408476	-0.463357	0.333476	0.0558887	0.0186375	-1.79709	1
316.201	27	Nebraska	3	-0.566646	-0.408476	-0.463357	0.333476	0.0558887	0.0186375	-1.79709	0
28.2006	27	Nebraska	2	-0.566646	-0.408476	-0.463357	0.333476	0.0558887	0.0186375	-0.797087	0
161.201	27	Nebraska	1	-0.566646	-0.408476	-0.463357	0.333476	0.0558887	0.0186375	0.202913	1
51.2006	27	Nebraska	2	-0.566646	-0.408476	-0.463357	0.333476	0.0558887	0.0186375	1.20291	1
257.201	27	Nebraska	2	-0.566646	-0.408476	-0.463357	0.333476	0.0558887	0.0186375	2.20291	1
49	31	Nevada	2	-0.20215	-0.144268	0.889715	0.374816	0.646686	0.242388	-1.79709	1
535	31	Nevada	3	-0.20215	-0.144268	0.889715	0.374816	0.646686	0.242388	-1.79709	1
540	31	Nevada	1	-0.20215	-0.144268	0.889715	0.374816	0.646686	0.242388	0.202913	1
756	31	Nevada	2	-0.20215	-0.144268	0.889715	0.374816	0.646686	0.242388	1.20291	1
876	31	Nevada	2	-0.20215	-0.144268	0.889715	0.374816	0.646686	0.242388	2.20291	0
884	31	Nevada	3	-0.20215	-0.144268	0.889715	0.374816	0.646686	0.242388	1.20291	1
885	31	Nevada	1	-0.20215	-0.144268	0.889715	0.374816	0.646686	0.242388	-2.79709	0
887	31	Nevada	1	-0.20215	-0.144268	0.889715	0.374816	0.646686	0.242388	-1.79709	0
888	31	Nevada	2	-0.20215	-0.144268	0.889715	0.374816	0.646686	0.242388	1.20291	1
943.201	31	Nevada	2	-0.20215	-0.144268	0.889715	0.374816	0.646686	0.242388	0.202913	1
904.201	31	Nevada	3	-0.20215	-0.144268	0.889715	0.374816	0.646686	0.242388	1.20291	0
905.201	31	Nevada	2	-0.20215	-0.144268	0.889715	0.374816	0.646686	0.242388	1.20291	0
969.201	31	Nevada	1	-0.20215	-0.144268	0.889715	0.374816	0.646686	0.242388	1.20291	0
388	28	New Hampshire	2	-1.39359	-1.71064	-1.81643	0.994916	0.912781	0.90814	2.20291	0
390	28	New Hampshire	3	-1.39359	-1.71064	-1.81643	0.994916	0.912781	0.90814	0.202913	1
669.201	28	New Hampshire	1	-1.39359	-1.71064	-1.81643	0.994916	0.912781	0.90814	-1.79709	0
774.201	28	New Hampshire	2	-1.39359	-1.71064	-1.81643	0.994916	0.912781	0.90814	1.20291	1
534.201	28	New Hampshire	2	-1.39359	-1.71064	-1.81643	0.994916	0.912781	0.90814	1.20291	1
481.201	28	New Hampshire	3	-1.39359	-1.71064	-1.81643	0.994916	0.912781	0.90814	1.20291	0
718.201	28	New Hampshire	2	-1.39359	-1.71064	-1.81643	0.994916	0.912781	0.90814	1.20291	0
730.201	28	New Hampshire	2	-1.39359	-1.71064	-1.81643	0.994916	0.912781	0.90814	1.20291	1
768.201	28	New Hampshire	3	-1.39359	-1.71064	-1.81643	0.994916	0.912781	0.90814	1.20291	0
532.201	28	New Hampshire	2	-1.39359	-1.71064	-1.81643	0.994916	0.912781	0.90814	2.20291	0
20	29	New Jersey	3	-0.281034	-0.732662	-1.39359	-0.079924	1.99692	-0.159602	-1.79709	1
23	29	New Jersey	3	-0.281034	-0.732662	-1.39359	-0.079924	1.99692	-0.159602	1.20291	0
159	29	New Jersey	2	-0.281034	-0.732662	-1.39359	-0.079924	1.99692	-0.159602	2.20291	0
165	29	New Jersey	3	-0.281034	-0.732662	-1.39359	-0.079924	1.99692	-0.159602	1.20291	0
173	29	New Jersey	2	-0.281034	-0.732662	-1.39359	-0.079924	1.99692	-0.159602	1.20291	1
179	29	New Jersey	1	-0.281034	-0.732662	-1.39359	-0.079924	1.99692	-0.159602	-1.79709	0
180	29	New Jersey	1	-0.281034	-0.732662	-1.39359	-0.079924	1.99692	-0.159602	1.20291	1
185	29	New Jersey	2	-0.281034	-0.732662	-1.39359	-0.079924	1.99692	-0.159602	0.202913	1
189	29	New Jersey	1	-0.281034	-0.732662	-1.39359	-0.079924	1.99692	-0.159602	1.20291	0
239	29	New Jersey	3	-0.281034	-0.732662	-1.39359	-0.079924	1.99692	-0.159602	-0.797087	1
313	29	New Jersey	2	-0.281034	-0.732662	-1.39359	-0.079924	1.99692	-0.159602	-0.797087	1
321	29	New Jersey	1	-0.281034	-0.732662	-1.39359	-0.079924	1.99692	-0.159602	-1.79709	1
324	29	New Jersey	3	-0.281034	-0.732662	-1.39359	-0.079924	1.99692	-0.159602	-1.79709	1
331	29	New Jersey	2	-0.281034	-0.732662	-1.39359	-0.079924	1.99692	-0.159602	0.202913	0
685	29	New Jersey	2	-0.281034	-0.732662	-1.39359	-0.079924	1.99692	-0.159602	0.202913	1
697	29	New Jersey	2	-0.281034	-0.732662	-1.39359	-0.079924	1.99692	-0.159602	-1.79709	0
783	29	New Jersey	3	-0.281034	-0.732662	-1.39359	-0.079924	1.99692	-0.159602	1.20291	0
786	29	New Jersey	1	-0.281034	-0.732662	-1.39359	-0.079924	1.99692	-0.159602	1.20291	1
789	29	New Jersey	3	-0.281034	-0.732662	-1.39359	-0.079924	1.99692	-0.159602	0.202913	1
925	29	New Jersey	1	-0.281034	-0.732662	-1.39359	-0.079924	1.99692	-0.159602	1.20291	1
926	29	New Jersey	2	-0.281034	-0.732662	-1.39359	-0.079924	1.99692	-0.159602	2.20291	0
930	29	New Jersey	2	-0.281034	-0.732662	-1.39359	-0.079924	1.99692	-0.159602	1.20291	0
728.201	29	New Jersey		-0.281034	-0.732662	-1.39359	-0.079924	1.99692	-0.159602	-1.79709	0
604.201	29	New Jersey	2	-0.281034	-0.732662	-1.39359	-0.079924	1.99692	-0.159602	-2.79709	0
641.201	29	New Jersey	2	-0.281034	-0.732662	-1.39359	-0.079924	1.99692	-0.159602	-1.79709	1
574.201	29	New Jersey	3	-0.281034	-0.732662	-1.39359	-0.079924	1.99692	-0.159602	-2.79709	0
461.201	29	New Jersey	2	-0.281034	-0.732662	-1.39359	-0.079924	1.99692	-0.159602	-1.79709	0
602.201	29	New Jersey	3	-0.281034	-0.732662	-1.39359	-0.079924	1.99692	-0.159602	-1.79709	1
698.201	29	New Jersey	2	-0.281034	-0.732662	-1.39359	-0.079924	1.99692	-0.159602	-1.79709	1
537.201	29	New Jersey	2	-0.281034	-0.732662	-1.39359	-0.079924	1.99692	-0.159602	-1.79709	0
689.201	29	New Jersey	2	-0.281034	-0.732662	-1.39359	-0.079924	1.99692	-0.159602	0.202913	0
530.201	29	New Jersey	2	-0.281034	-0.732662	-1.39359	-0.079924	1.99692	-0.159602	-0.797087	1
533.201	29	New Jersey	3	-0.281034	-0.732662	-1.39359	-0.079924	1.99692	-0.159602	0.202913	1
510.201	29	New Jersey	2	-0.281034	-0.732662	-1.39359	-0.079924	1.99692	-0.159602	0.202913	0
766.201	29	New Jersey	2	-0.281034	-0.732662	-1.39359	-0.079924	1.99692	-0.159602	0.202913	1
526.201	29	New Jersey	3	-0.281034	-0.732662	-1.39359	-0.079924	1.99692	-0.159602	-0.797087	1
617.201	29	New Jersey	2	-0.281034	-0.732662	-1.39359	-0.079924	1.99692	-0.159602	1.20291	1
505.201	29	New Jersey	3	-0.281034	-0.732662	-1.39359	-0.079924	1.99692	-0.159602	1.20291	0
508.201	29	New Jersey	1	-0.281034	-0.732662	-1.39359	-0.079924	1.99692	-0.159602	1.20291	1
621.201	29	New Jersey	2	-0.281034	-0.732662	-1.39359	-0.079924	1.99692	-0.159602	1.20291	1
683.201	29	New Jersey	3	-0.281034	-0.732662	-1.39359	-0.079924	1.99692	-0.159602	1.20291	0
746.201	29	New Jersey		-0.281034	-0.732662	-1.39359	-0.079924	1.99692	-0.159602	1.20291	0
714.201	29	New Jersey	2	-0.281034	-0.732662	-1.39359	-0.079924	1.99692	-0.159602	1.20291	1
778.201	29	New Jersey	2	-0.281034	-0.732662	-1.39359	-0.079924	1.99692	-0.159602	1.20291	1
482.201	29	New Jersey	2	-0.281034	-0.732662	-1.39359	-0.079924	1.99692	-0.159602	1.20291	1
649.201	29	New Jersey	2	-0.281034	-0.732662	-1.39359	-0.079924	1.99692	-0.159602	1.20291	1
755.201	29	New Jersey	3	-0.281034	-0.732662	-1.39359	-0.079924	1.99692	-0.159602	1.20291	1
563.201	29	New Jersey	2	-0.281034	-0.732662	-1.39359	-0.079924	1.99692	-0.159602	2.20291	1
619.201	29	New Jersey	3	-0.281034	-0.732662	-1.39359	-0.079924	1.99692	-0.159602	2.20291	1
564.201	29	New Jersey	2	-0.281034	-0.732662	-1.39359	-0.079924	1.99692	-0.159602	2.20291	1
227	30	New Mexico	3	0.210228	0.486633	1.90452	0.085436	-0.98967	-0.0845534	0.202913	0
359	30	New Mexico		0.210228	0.486633	1.90452	0.085436	-0.98967	-0.0845534	0.202913	1
414	30	New Mexico	3	0.210228	0.486633	1.90452	0.085436	-0.98967	-0.0845534	-1.79709	0
537	30	New Mexico	2	0.210228	0.486633	1.90452	0.085436	-0.98967	-0.0845534	-2.79709	1
633	30	New Mexico	2	0.210228	0.486633	1.90452	0.085436	-0.98967	-0.0845534	1.20291	0
644	30	New Mexico	2	0.210228	0.486633	1.90452	0.085436	-0.98967	-0.0845534	0.202913	0
758	30	New Mexico	3	0.210228	0.486633	1.90452	0.085436	-0.98967	-0.0845534	-1.79709	0
855.201	30	New Mexico	3	0.210228	0.486633	1.90452	0.085436	-0.98967	-0.0845534	-1.79709	0
849.201	30	New Mexico	2	0.210228	0.486633	1.90452	0.085436	-0.98967	-0.0845534	-1.79709	1
862.201	30	New Mexico	2	0.210228	0.486633	1.90452	0.085436	-0.98967	-0.0845534	-1.79709	0
858.201	30	New Mexico	3	0.210228	0.486633	1.90452	0.085436	-0.98967	-0.0845534	-0.797087	1
845.201	30	New Mexico	3	0.210228	0.486633	1.90452	0.085436	-0.98967	-0.0845534	1.20291	1
870.201	30	New Mexico	2	0.210228	0.486633	1.90452	0.085436	-0.98967	-0.0845534	1.20291	0
872.201	30	New Mexico	1	0.210228	0.486633	1.90452	0.085436	-0.98967	-0.0845534	1.20291	1
842.201	30	New Mexico	1	0.210228	0.486633	1.90452	0.085436	-0.98967	-0.0845534	1.20291	0
854.201	30	New Mexico	2	0.210228	0.486633	1.90452	0.085436	-0.98967	-0.0845534	1.20291	0
807.201	30	New Mexico	1	0.210228	0.486633	1.90452	0.085436	-0.98967	-0.0845534	1.20291	1
874.201	30	New Mexico	2	0.210228	0.486633	1.90452	0.085436	-0.98967	-0.0845534	1.20291	1
8	32	New York	2	0.600636	0.452628	-1.05533	-0.079924	1.01895	-0.0814384	1.20291	1
38	32	New York	1	0.600636	0.452628	-1.05533	-0.079924	1.01895	-0.0814384	1.20291	0
40	32	New York	2	0.600636	0.452628	-1.05533	-0.079924	1.01895	-0.0814384	0.202913	0
82	32	New York	1	0.600636	0.452628	-1.05533	-0.079924	1.01895	-0.0814384	-3.79709	1
90	32	New York	3	0.600636	0.452628	-1.05533	-0.079924	1.01895	-0.0814384	-2.79709	0
93	32	New York	3	0.600636	0.452628	-1.05533	-0.079924	1.01895	-0.0814384	0.202913	1
94	32	New York	3	0.600636	0.452628	-1.05533	-0.079924	1.01895	-0.0814384	-1.79709	0
103	32	New York	3	0.600636	0.452628	-1.05533	-0.079924	1.01895	-0.0814384	-1.79709	1
164	32	New York	2	0.600636	0.452628	-1.05533	-0.079924	1.01895	-0.0814384	1.20291	1
167	32	New York	3	0.600636	0.452628	-1.05533	-0.079924	1.01895	-0.0814384	1.20291	1
174	32	New York	3	0.600636	0.452628	-1.05533	-0.079924	1.01895	-0.0814384	2.20291	0
178	32	New York	3	0.600636	0.452628	-1.05533	-0.079924	1.01895	-0.0814384	1.20291	0
181	32	New York	1	0.600636	0.452628	-1.05533	-0.079924	1.01895	-0.0814384	2.20291	0
191	32	New York	2	0.600636	0.452628	-1.05533	-0.079924	1.01895	-0.0814384	-1.79709	1
193	32	New York	3	0.600636	0.452628	-1.05533	-0.079924	1.01895	-0.0814384	-2.79709	1
221	32	New York	2	0.600636	0.452628	-1.05533	-0.079924	1.01895	-0.0814384	2.20291	0
263	32	New York	3	0.600636	0.452628	-1.05533	-0.079924	1.01895	-0.0814384	-2.79709	0
307	32	New York	1	0.600636	0.452628	-1.05533	-0.079924	1.01895	-0.0814384	2.20291	0
308	32	New York		0.600636	0.452628	-1.05533	-0.079924	1.01895	-0.0814384	-1.79709	0
310	32	New York	1	0.600636	0.452628	-1.05533	-0.079924	1.01895	-0.0814384	2.20291	0
314	32	New York	3	0.600636	0.452628	-1.05533	-0.079924	1.01895	-0.0814384	-1.79709	0
315	32	New York	2	0.600636	0.452628	-1.05533	-0.079924	1.01895	-0.0814384	0.202913	0
316	32	New York	2	0.600636	0.452628	-1.05533	-0.079924	1.01895	-0.0814384	2.20291	0
317	32	New York	3	0.600636	0.452628	-1.05533	-0.079924	1.01895	-0.0814384	1.20291	1
323	32	New York	1	0.600636	0.452628	-1.05533	-0.079924	1.01895	-0.0814384	1.20291	0
325	32	New York	2	0.600636	0.452628	-1.05533	-0.079924	1.01895	-0.0814384	1.20291	0
326	32	New York	1	0.600636	0.452628	-1.05533	-0.079924	1.01895	-0.0814384	-1.79709	1
327	32	New York	3	0.600636	0.452628	-1.05533	-0.079924	1.01895	-0.0814384	-1.79709	1
328	32	New York	2	0.600636	0.452628	-1.05533	-0.079924	1.01895	-0.0814384	2.20291	0
329	32	New York	2	0.600636	0.452628	-1.05533	-0.079924	1.01895	-0.0814384	1.20291	0
333	32	New York	1	0.600636	0.452628	-1.05533	-0.079924	1.01895	-0.0814384	-1.79709	1
458	32	New York	2	0.600636	0.452628	-1.05533	-0.079924	1.01895	-0.0814384	-1.79709	0
460	32	New York	2	0.600636	0.452628	-1.05533	-0.079924	1.01895	-0.0814384	1.20291	0
464	32	New York	3	0.600636	0.452628	-1.05533	-0.079924	1.01895	-0.0814384	1.20291	1
466	32	New York	2	0.600636	0.452628	-1.05533	-0.079924	1.01895	-0.0814384	2.20291	0
469	32	New York	3	0.600636	0.452628	-1.05533	-0.079924	1.01895	-0.0814384	1.20291	0
599	32	New York	3	0.600636	0.452628	-1.05533	-0.079924	1.01895	-0.0814384	-1.79709	0
617	32	New York	3	0.600636	0.452628	-1.05533	-0.079924	1.01895	-0.0814384	0.202913	1
668	32	New York	2	0.600636	0.452628	-1.05533	-0.079924	1.01895	-0.0814384	2.20291	1
671	32	New York	3	0.600636	0.452628	-1.05533	-0.079924	1.01895	-0.0814384	1.20291	0
678	32	New York	2	0.600636	0.452628	-1.05533	-0.079924	1.01895	-0.0814384	-1.79709	1
687	32	New York	2	0.600636	0.452628	-1.05533	-0.079924	1.01895	-0.0814384	2.20291	0
688	32	New York	3	0.600636	0.452628	-1.05533	-0.079924	1.01895	-0.0814384	1.20291	1
689	32	New York	2	0.600636	0.452628	-1.05533	-0.079924	1.01895	-0.0814384	2.20291	1
700	32	New York		0.600636	0.452628	-1.05533	-0.079924	1.01895	-0.0814384	0.202913	0
782	32	New York	3	0.600636	0.452628	-1.05533	-0.079924	1.01895	-0.0814384	-1.79709	0
784	32	New York	2	0.600636	0.452628	-1.05533	-0.079924	1.01895	-0.0814384	1.20291	1
787	32	New York	1	0.600636	0.452628	-1.05533	-0.079924	1.01895	-0.0814384	2.20291	0
791	32	New York	3	0.600636	0.452628	-1.05533	-0.079924	1.01895	-0.0814384	0.202913	1
792	32	New York	3	0.600636	0.452628	-1.05533	-0.079924	1.01895	-0.0814384	0.202913	1
795	32	New York	2	0.600636	0.452628	-1.05533	-0.079924	1.01895	-0.0814384	1.20291	1
798	32	New York		0.600636	0.452628	-1.05533	-0.079924	1.01895	-0.0814384	-1.79709	1
803	32	New York	2	0.600636	0.452628	-1.05533	-0.079924	1.01895	-0.0814384	1.20291	1
918	32	New York	3	0.600636	0.452628	-1.05533	-0.079924	1.01895	-0.0814384	-1.79709	1
919	32	New York	1	0.600636	0.452628	-1.05533	-0.079924	1.01895	-0.0814384	-2.79709	1
921	32	New York	2	0.600636	0.452628	-1.05533	-0.079924	1.01895	-0.0814384	-2.79709	1
923	32	New York	3	0.600636	0.452628	-1.05533	-0.079924	1.01895	-0.0814384	0.202913	1
927	32	New York	2	0.600636	0.452628	-1.05533	-0.079924	1.01895	-0.0814384	1.20291	0
932	32	New York	2	0.600636	0.452628	-1.05533	-0.079924	1.01895	-0.0814384	2.20291	0
933	32	New York	2	0.600636	0.452628	-1.05533	-0.079924	1.01895	-0.0814384	1.20291	1
935	32	New York	1	0.600636	0.452628	-1.05533	-0.079924	1.01895	-0.0814384	-1.79709	0
937	32	New York	2	0.600636	0.452628	-1.05533	-0.079924	1.01895	-0.0814384	0.202913	1
938	32	New York	1	0.600636	0.452628	-1.05533	-0.079924	1.01895	-0.0814384	2.20291	0
432.201	32	New York	3	0.600636	0.452628	-1.05533	-0.079924	1.01895	-0.0814384		0
592.201	32	New York	3	0.600636	0.452628	-1.05533	-0.079924	1.01895	-0.0814384		0
13.2006	32	New York	2	0.600636	0.452628	-1.05533	-0.079924	1.01895	-0.0814384	-1.79709	1
465.201	32	New York	2	0.600636	0.452628	-1.05533	-0.079924	1.01895	-0.0814384	-2.79709	0
643.201	32	New York	1	0.600636	0.452628	-1.05533	-0.079924	1.01895	-0.0814384	-1.79709	0
770.201	32	New York	1	0.600636	0.452628	-1.05533	-0.079924	1.01895	-0.0814384	-1.79709	1
661.201	32	New York	3	0.600636	0.452628	-1.05533	-0.079924	1.01895	-0.0814384	-1.79709	0
612.201	32	New York	2	0.600636	0.452628	-1.05533	-0.079924	1.01895	-0.0814384	-1.79709	1
733.201	32	New York	2	0.600636	0.452628	-1.05533	-0.079924	1.01895	-0.0814384	-1.79709	1
434.201	32	New York	2	0.600636	0.452628	-1.05533	-0.079924	1.01895	-0.0814384	-2.79709	1
466.201	32	New York	2	0.600636	0.452628	-1.05533	-0.079924	1.01895	-0.0814384	-1.79709	1
538.201	32	New York	2	0.600636	0.452628	-1.05533	-0.079924	1.01895	-0.0814384	-1.79709	0
622.201	32	New York	3	0.600636	0.452628	-1.05533	-0.079924	1.01895	-0.0814384	-1.79709	0
640.201	32	New York	3	0.600636	0.452628	-1.05533	-0.079924	1.01895	-0.0814384	-1.79709	1
715.201	32	New York	2	0.600636	0.452628	-1.05533	-0.079924	1.01895	-0.0814384	-1.79709	0
732.201	32	New York	3	0.600636	0.452628	-1.05533	-0.079924	1.01895	-0.0814384	-1.79709	0
751.201	32	New York	3	0.600636	0.452628	-1.05533	-0.079924	1.01895	-0.0814384	-1.79709	1
762.201	32	New York	3	0.600636	0.452628	-1.05533	-0.079924	1.01895	-0.0814384	-1.79709	1
439.201	32	New York	3	0.600636	0.452628	-1.05533	-0.079924	1.01895	-0.0814384	0.202913	0
632.201	32	New York	3	0.600636	0.452628	-1.05533	-0.079924	1.01895	-0.0814384	0.202913	1
753.201	32	New York	3	0.600636	0.452628	-1.05533	-0.079924	1.01895	-0.0814384	0.202913	1
499.201	32	New York	3	0.600636	0.452628	-1.05533	-0.079924	1.01895	-0.0814384	0.202913	1
613.201	32	New York	2	0.600636	0.452628	-1.05533	-0.079924	1.01895	-0.0814384	0.202913	1
453.201	32	New York	3	0.600636	0.452628	-1.05533	-0.079924	1.01895	-0.0814384	0.202913	0
457.201	32	New York	2	0.600636	0.452628	-1.05533	-0.079924	1.01895	-0.0814384	0.202913	0
501.201	32	New York	3	0.600636	0.452628	-1.05533	-0.079924	1.01895	-0.0814384	0.202913	1
603.201	32	New York	1	0.600636	0.452628	-1.05533	-0.079924	1.01895	-0.0814384	0.202913	1
638.201	32	New York	3	0.600636	0.452628	-1.05533	-0.079924	1.01895	-0.0814384	0.202913	0
655.201	32	New York	2	0.600636	0.452628	-1.05533	-0.079924	1.01895	-0.0814384	0.202913	0
478.201	32	New York	2	0.600636	0.452628	-1.05533	-0.079924	1.01895	-0.0814384	0.202913	0
703.201	32	New York	3	0.600636	0.452628	-1.05533	-0.079924	1.01895	-0.0814384	0.202913	0
744.201	32	New York	3	0.600636	0.452628	-1.05533	-0.079924	1.01895	-0.0814384	1.20291	1
512.201	32	New York	2	0.600636	0.452628	-1.05533	-0.079924	1.01895	-0.0814384	1.20291	1
747.201	32	New York	2	0.600636	0.452628	-1.05533	-0.079924	1.01895	-0.0814384	1.20291	1
476.201	32	New York	2	0.600636	0.452628	-1.05533	-0.079924	1.01895	-0.0814384	1.20291	1
562.201	32	New York	2	0.600636	0.452628	-1.05533	-0.079924	1.01895	-0.0814384	1.20291	1
583.201	32	New York	2	0.600636	0.452628	-1.05533	-0.079924	1.01895	-0.0814384	1.20291	0
593.201	32	New York	3	0.600636	0.452628	-1.05533	-0.079924	1.01895	-0.0814384	1.20291	1
611.201	32	New York	3	0.600636	0.452628	-1.05533	-0.079924	1.01895	-0.0814384	1.20291	1
658.201	32	New York	2	0.600636	0.452628	-1.05533	-0.079924	1.01895	-0.0814384	1.20291	0
662.201	32	New York	3	0.600636	0.452628	-1.05533	-0.079924	1.01895	-0.0814384	1.20291	1
597.201	32	New York	2	0.600636	0.452628	-1.05533	-0.079924	1.01895	-0.0814384	1.20291	0
625.201	32	New York	2	0.600636	0.452628	-1.05533	-0.079924	1.01895	-0.0814384	1.20291	1
511.201	32	New York	1	0.600636	0.452628	-1.05533	-0.079924	1.01895	-0.0814384	1.20291	0
540.201	32	New York	2	0.600636	0.452628	-1.05533	-0.079924	1.01895	-0.0814384	2.20291	1
735.201	32	New York	2	0.600636	0.452628	-1.05533	-0.079924	1.01895	-0.0814384	2.20291	1
757.201	32	New York	1	0.600636	0.452628	-1.05533	-0.079924	1.01895	-0.0814384	2.20291	0
629.201	32	New York	2	0.600636	0.452628	-1.05533	-0.079924	1.01895	-0.0814384	2.20291	1
693.201	32	New York	3	0.600636	0.452628	-1.05533	-0.079924	1.01895	-0.0814384	2.20291	0
441.201	32	New York		0.600636	0.452628	-1.05533	-0.079924	1.01895	-0.0814384	2.20291	0
27	25	North Carolina	2	1.00751	0.939877	0.720581	-0.348634	-0.43538	0.151788	2.20291	0
28	25	North Carolina	2	1.00751	0.939877	0.720581	-0.348634	-0.43538	0.151788	1.20291	0
111	25	North Carolina	2	1.00751	0.939877	0.720581	-0.348634	-0.43538	0.151788	2.20291	1
143	25	North Carolina	2	1.00751	0.939877	0.720581	-0.348634	-0.43538	0.151788	2.20291	0
162	25	North Carolina	2	1.00751	0.939877	0.720581	-0.348634	-0.43538	0.151788	0.202913	0
166	25	North Carolina	3	1.00751	0.939877	0.720581	-0.348634	-0.43538	0.151788	-1.79709	1
210	25	North Carolina		1.00751	0.939877	0.720581	-0.348634	-0.43538	0.151788	-2.79709	1
269	25	North Carolina	3	1.00751	0.939877	0.720581	-0.348634	-0.43538	0.151788	-2.79709	0
271	25	North Carolina	3	1.00751	0.939877	0.720581	-0.348634	-0.43538	0.151788	0.202913	0
275	25	North Carolina	2	1.00751	0.939877	0.720581	-0.348634	-0.43538	0.151788	0.202913	0
286	25	North Carolina	1	1.00751	0.939877	0.720581	-0.348634	-0.43538	0.151788	1.20291	1
289	25	North Carolina	2	1.00751	0.939877	0.720581	-0.348634	-0.43538	0.151788	0.202913	0
365	25	North Carolina	3	1.00751	0.939877	0.720581	-0.348634	-0.43538	0.151788	1.20291	1
397	25	North Carolina	3	1.00751	0.939877	0.720581	-0.348634	-0.43538	0.151788	0.202913	0
419	25	North Carolina	2	1.00751	0.939877	0.720581	-0.348634	-0.43538	0.151788	1.20291	0
422	25	North Carolina	3	1.00751	0.939877	0.720581	-0.348634	-0.43538	0.151788	2.20291	0
461	25	North Carolina	2	1.00751	0.939877	0.720581	-0.348634	-0.43538	0.151788	1.20291	1
465	25	North Carolina	3	1.00751	0.939877	0.720581	-0.348634	-0.43538	0.151788	0.202913	0
583	25	North Carolina	2	1.00751	0.939877	0.720581	-0.348634	-0.43538	0.151788	2.20291	1
592	25	North Carolina	2	1.00751	0.939877	0.720581	-0.348634	-0.43538	0.151788	0.202913	1
603	25	North Carolina	2	1.00751	0.939877	0.720581	-0.348634	-0.43538	0.151788	2.20291	1
604	25	North Carolina	3	1.00751	0.939877	0.720581	-0.348634	-0.43538	0.151788	2.20291	0
616	25	North Carolina	3	1.00751	0.939877	0.720581	-0.348634	-0.43538	0.151788	-2.79709	1
629	25	North Carolina	2	1.00751	0.939877	0.720581	-0.348634	-0.43538	0.151788	2.20291	1
649	25	North Carolina	2	1.00751	0.939877	0.720581	-0.348634	-0.43538	0.151788	2.20291	1
712	25	North Carolina	2	1.00751	0.939877	0.720581	-0.348634	-0.43538	0.151788	-1.79709	0
713	25	North Carolina	3	1.00751	0.939877	0.720581	-0.348634	-0.43538	0.151788	-3.79709	1
722	25	North Carolina	2	1.00751	0.939877	0.720581	-0.348634	-0.43538	0.151788	-0.797087	0
727	25	North Carolina	3	1.00751	0.939877	0.720581	-0.348634	-0.43538	0.151788	-1.79709	0
735	25	North Carolina	3	1.00751	0.939877	0.720581	-0.348634	-0.43538	0.151788	-1.79709	1
737	25	North Carolina	2	1.00751	0.939877	0.720581	-0.348634	-0.43538	0.151788	-1.79709	0
738	25	North Carolina	3	1.00751	0.939877	0.720581	-0.348634	-0.43538	0.151788	-1.79709	1
742	25	North Carolina	2	1.00751	0.939877	0.720581	-0.348634	-0.43538	0.151788		0
830	25	North Carolina	2	1.00751	0.939877	0.720581	-0.348634	-0.43538	0.151788	0.202913	1
832	25	North Carolina	2	1.00751	0.939877	0.720581	-0.348634	-0.43538	0.151788	0.202913	0
839	25	North Carolina	2	1.00751	0.939877	0.720581	-0.348634	-0.43538	0.151788	2.20291	1
841	25	North Carolina	2	1.00751	0.939877	0.720581	-0.348634	-0.43538	0.151788	2.20291	1
844	25	North Carolina	3	1.00751	0.939877	0.720581	-0.348634	-0.43538	0.151788	0.202913	0
977	25	North Carolina	2	1.00751	0.939877	0.720581	-0.348634	-0.43538	0.151788	-1.79709	0
980	25	North Carolina	2	1.00751	0.939877	0.720581	-0.348634	-0.43538	0.151788	-1.79709	1
983	25	North Carolina	1	1.00751	0.939877	0.720581	-0.348634	-0.43538	0.151788	0.202913	1
992	25	North Carolina	2	1.00751	0.939877	0.720581	-0.348634	-0.43538	0.151788	2.20291	0
552.201	25	North Carolina	3	1.00751	0.939877	0.720581	-0.348634	-0.43538	0.151788	-1.79709	1
713.201	25	North Carolina	3	1.00751	0.939877	0.720581	-0.348634	-0.43538	0.151788	-2.79709	0
471.201	25	North Carolina	3	1.00751	0.939877	0.720581	-0.348634	-0.43538	0.151788	-2.79709	1
752.201	25	North Carolina	2	1.00751	0.939877	0.720581	-0.348634	-0.43538	0.151788	-1.79709	1
536.201	25	North Carolina		1.00751	0.939877	0.720581	-0.348634	-0.43538	0.151788	-3.79709	1
694.201	25	North Carolina		1.00751	0.939877	0.720581	-0.348634	-0.43538	0.151788	-1.79709	0
650.201	25	North Carolina	2	1.00751	0.939877	0.720581	-0.348634	-0.43538	0.151788	0.202913	1
435.201	25	North Carolina	2	1.00751	0.939877	0.720581	-0.348634	-0.43538	0.151788	0.202913	0
656.201	25	North Carolina	2	1.00751	0.939877	0.720581	-0.348634	-0.43538	0.151788	0.202913	1
615.201	25	North Carolina	2	1.00751	0.939877	0.720581	-0.348634	-0.43538	0.151788	0.202913	1
709.201	25	North Carolina	3	1.00751	0.939877	0.720581	-0.348634	-0.43538	0.151788	0.202913	1
498.201	25	North Carolina	2	1.00751	0.939877	0.720581	-0.348634	-0.43538	0.151788	1.20291	0
514.201	25	North Carolina	1	1.00751	0.939877	0.720581	-0.348634	-0.43538	0.151788	1.20291	1
518.201	25	North Carolina	2	1.00751	0.939877	0.720581	-0.348634	-0.43538	0.151788	1.20291	1
493	26	North Dakota	2	-1.1078	-0.937696	-0.801625	1.86306	-0.541557	-1.00895	1.20291	1
538	26	North Dakota	3	-1.1078	-0.937696	-0.801625	1.86306	-0.541557	-1.00895	-1.79709	1
718	26	North Dakota	2	-1.1078	-0.937696	-0.801625	1.86306	-0.541557	-1.00895	0.202913	0
721	26	North Dakota	2	-1.1078	-0.937696	-0.801625	1.86306	-0.541557	-1.00895	0.202913	1
730	26	North Dakota	3	-1.1078	-0.937696	-0.801625	1.86306	-0.541557	-1.00895	0.202913	1
976	26	North Dakota		-1.1078	-0.937696	-0.801625	1.86306	-0.541557	-1.00895	0.202913	1
824.201	26	North Dakota	1	-1.1078	-0.937696	-0.801625	1.86306	-0.541557	-1.00895	-1.79709	0
150.201	26	North Dakota	2	-1.1078	-0.937696	-0.801625	1.86306	-0.541557	-1.00895	-2.79709	1
108.201	26	North Dakota	3	-1.1078	-0.937696	-0.801625	1.86306	-0.541557	-1.00895	0.202913	1
191.201	26	North Dakota	3	-1.1078	-0.937696	-0.801625	1.86306	-0.541557	-1.00895	0.202913	1
337.201	26	North Dakota	3	-1.1078	-0.937696	-0.801625	1.86306	-0.541557	-1.00895	1.20291	0
32.2006	26	North Dakota	2	-1.1078	-0.937696	-0.801625	1.86306	-0.541557	-1.00895	2.20291	1
3	33	Ohio	2	0.358167	0.715698	-0.0405217	0.181896	-0.327	-0.0594799	2.20291	0
68	33	Ohio	2	0.358167	0.715698	-0.0405217	0.181896	-0.327	-0.0594799	1.20291	0
69	33	Ohio	3	0.358167	0.715698	-0.0405217	0.181896	-0.327	-0.0594799	0.202913	1
70	33	Ohio	2	0.358167	0.715698	-0.0405217	0.181896	-0.327	-0.0594799	1.20291	1
76	33	Ohio	2	0.358167	0.715698	-0.0405217	0.181896	-0.327	-0.0594799	-2.79709	0
77	33	Ohio	3	0.358167	0.715698	-0.0405217	0.181896	-0.327	-0.0594799	1.20291	1
91	33	Ohio	3	0.358167	0.715698	-0.0405217	0.181896	-0.327	-0.0594799	0.202913	0
129	33	Ohio	3	0.358167	0.715698	-0.0405217	0.181896	-0.327	-0.0594799	1.20291	0
130	33	Ohio	2	0.358167	0.715698	-0.0405217	0.181896	-0.327	-0.0594799	0.202913	1
136	33	Ohio	2	0.358167	0.715698	-0.0405217	0.181896	-0.327	-0.0594799	-1.79709	0
140	33	Ohio	2	0.358167	0.715698	-0.0405217	0.181896	-0.327	-0.0594799	-1.79709	1
144	33	Ohio	1	0.358167	0.715698	-0.0405217	0.181896	-0.327	-0.0594799	1.20291	0
145	33	Ohio	3	0.358167	0.715698	-0.0405217	0.181896	-0.327	-0.0594799	-1.79709	0
153	33	Ohio	3	0.358167	0.715698	-0.0405217	0.181896	-0.327	-0.0594799	-2.79709	1
154	33	Ohio	2	0.358167	0.715698	-0.0405217	0.181896	-0.327	-0.0594799	1.20291	0
156	33	Ohio	2	0.358167	0.715698	-0.0405217	0.181896	-0.327	-0.0594799	-1.79709	1
206	33	Ohio	3	0.358167	0.715698	-0.0405217	0.181896	-0.327	-0.0594799	-1.79709	1
209	33	Ohio	3	0.358167	0.715698	-0.0405217	0.181896	-0.327	-0.0594799	-1.79709	1
290	33	Ohio	1	0.358167	0.715698	-0.0405217	0.181896	-0.327	-0.0594799	0.202913	0
297	33	Ohio	3	0.358167	0.715698	-0.0405217	0.181896	-0.327	-0.0594799	1.20291	1
298	33	Ohio	2	0.358167	0.715698	-0.0405217	0.181896	-0.327	-0.0594799	-1.79709	1
303	33	Ohio	2	0.358167	0.715698	-0.0405217	0.181896	-0.327	-0.0594799	2.20291	0
304	33	Ohio	1	0.358167	0.715698	-0.0405217	0.181896	-0.327	-0.0594799	-2.79709	0
305	33	Ohio	2	0.358167	0.715698	-0.0405217	0.181896	-0.327	-0.0594799	-1.79709	0
425	33	Ohio	2	0.358167	0.715698	-0.0405217	0.181896	-0.327	-0.0594799	-1.79709	0
426	33	Ohio	2	0.358167	0.715698	-0.0405217	0.181896	-0.327	-0.0594799	2.20291	1
437	33	Ohio	2	0.358167	0.715698	-0.0405217	0.181896	-0.327	-0.0594799	0.202913	1
443	33	Ohio	3	0.358167	0.715698	-0.0405217	0.181896	-0.327	-0.0594799	1.20291	0
446	33	Ohio	1	0.358167	0.715698	-0.0405217	0.181896	-0.327	-0.0594799	-1.79709	0
451	33	Ohio	1	0.358167	0.715698	-0.0405217	0.181896	-0.327	-0.0594799	2.20291	0
456	33	Ohio	2	0.358167	0.715698	-0.0405217	0.181896	-0.327	-0.0594799	-2.79709	0
459	33	Ohio	2	0.358167	0.715698	-0.0405217	0.181896	-0.327	-0.0594799	1.20291	0
468	33	Ohio	2	0.358167	0.715698	-0.0405217	0.181896	-0.327	-0.0594799	1.20291	1
578	33	Ohio	2	0.358167	0.715698	-0.0405217	0.181896	-0.327	-0.0594799	0.202913	0
582	33	Ohio	3	0.358167	0.715698	-0.0405217	0.181896	-0.327	-0.0594799	2.20291	1
622	33	Ohio	3	0.358167	0.715698	-0.0405217	0.181896	-0.327	-0.0594799	1.20291	0
675	33	Ohio	2	0.358167	0.715698	-0.0405217	0.181896	-0.327	-0.0594799	-1.79709	1
681	33	Ohio	2	0.358167	0.715698	-0.0405217	0.181896	-0.327	-0.0594799	-1.79709	0
682	33	Ohio	2	0.358167	0.715698	-0.0405217	0.181896	-0.327	-0.0594799	0.202913	1
684	33	Ohio	2	0.358167	0.715698	-0.0405217	0.181896	-0.327	-0.0594799	-0.797087	0
691	33	Ohio	3	0.358167	0.715698	-0.0405217	0.181896	-0.327	-0.0594799	-1.79709	0
692	33	Ohio	3	0.358167	0.715698	-0.0405217	0.181896	-0.327	-0.0594799	0.202913	1
694	33	Ohio	3	0.358167	0.715698	-0.0405217	0.181896	-0.327	-0.0594799	-2.79709	0
696	33	Ohio		0.358167	0.715698	-0.0405217	0.181896	-0.327	-0.0594799	-1.79709	0
802	33	Ohio	2	0.358167	0.715698	-0.0405217	0.181896	-0.327	-0.0594799	0.202913	1
807	33	Ohio	3	0.358167	0.715698	-0.0405217	0.181896	-0.327	-0.0594799	0.202913	1
810	33	Ohio	3	0.358167	0.715698	-0.0405217	0.181896	-0.327	-0.0594799		1
811	33	Ohio	3	0.358167	0.715698	-0.0405217	0.181896	-0.327	-0.0594799	-1.79709	1
814	33	Ohio	2	0.358167	0.715698	-0.0405217	0.181896	-0.327	-0.0594799	0.202913	0
815	33	Ohio	2	0.358167	0.715698	-0.0405217	0.181896	-0.327	-0.0594799	1.20291	0
816	33	Ohio	2	0.358167	0.715698	-0.0405217	0.181896	-0.327	-0.0594799	1.20291	1
941	33	Ohio	3	0.358167	0.715698	-0.0405217	0.181896	-0.327	-0.0594799	-1.79709	1
942	33	Ohio	2	0.358167	0.715698	-0.0405217	0.181896	-0.327	-0.0594799	1.20291	1
947	33	Ohio	2	0.358167	0.715698	-0.0405217	0.181896	-0.327	-0.0594799	-1.79709	0
950	33	Ohio	2	0.358167	0.715698	-0.0405217	0.181896	-0.327	-0.0594799	-1.79709	1
955	33	Ohio	3	0.358167	0.715698	-0.0405217	0.181896	-0.327	-0.0594799	-1.79709	0
960	33	Ohio	2	0.358167	0.715698	-0.0405217	0.181896	-0.327	-0.0594799	0.202913	1
961	33	Ohio	3	0.358167	0.715698	-0.0405217	0.181896	-0.327	-0.0594799	1.20291	1
963	33	Ohio	3	0.358167	0.715698	-0.0405217	0.181896	-0.327	-0.0594799	1.20291	0
446.201	33	Ohio	2	0.358167	0.715698	-0.0405217	0.181896	-0.327	-0.0594799	-1.79709	1
449.201	33	Ohio	2	0.358167	0.715698	-0.0405217	0.181896	-0.327	-0.0594799	-1.79709	1
486.201	33	Ohio	3	0.358167	0.715698	-0.0405217	0.181896	-0.327	-0.0594799	-1.79709	1
431.201	33	Ohio	2	0.358167	0.715698	-0.0405217	0.181896	-0.327	-0.0594799	-1.79709	1
504.201	33	Ohio	3	0.358167	0.715698	-0.0405217	0.181896	-0.327	-0.0594799	-1.79709	1
479.201	33	Ohio	3	0.358167	0.715698	-0.0405217	0.181896	-0.327	-0.0594799	-1.79709	0
535.201	33	Ohio	2	0.358167	0.715698	-0.0405217	0.181896	-0.327	-0.0594799	-2.79709	1
554.201	33	Ohio	3	0.358167	0.715698	-0.0405217	0.181896	-0.327	-0.0594799	0.202913	0
469.201	33	Ohio	3	0.358167	0.715698	-0.0405217	0.181896	-0.327	-0.0594799	-0.797087	0
517.201	33	Ohio	3	0.358167	0.715698	-0.0405217	0.181896	-0.327	-0.0594799	0.202913	1
468.201	33	Ohio	3	0.358167	0.715698	-0.0405217	0.181896	-0.327	-0.0594799	1.20291	0
507.201	33	Ohio	3	0.358167	0.715698	-0.0405217	0.181896	-0.327	-0.0594799	1.20291	1
452.201	33	Ohio		0.358167	0.715698	-0.0405217	0.181896	-0.327	-0.0594799	2.20291	0
503.201	33	Ohio	2	0.358167	0.715698	-0.0405217	0.181896	-0.327	-0.0594799	2.20291	1
109	34	Oklahoma	2	0.294323	0.390508	1.22798	-0.162604	-0.924686	0.150358	-2.79709	1
125	34	Oklahoma	2	0.294323	0.390508	1.22798	-0.162604	-0.924686	0.150358	2.20291	0
126	34	Oklahoma	3	0.294323	0.390508	1.22798	-0.162604	-0.924686	0.150358	-0.797087	1
226	34	Oklahoma	2	0.294323	0.390508	1.22798	-0.162604	-0.924686	0.150358	1.20291	0
234	34	Oklahoma	2	0.294323	0.390508	1.22798	-0.162604	-0.924686	0.150358	-1.79709	1
347	34	Oklahoma	2	0.294323	0.390508	1.22798	-0.162604	-0.924686	0.150358	1.20291	0
380	34	Oklahoma	3	0.294323	0.390508	1.22798	-0.162604	-0.924686	0.150358	-1.79709	0
382	34	Oklahoma	2	0.294323	0.390508	1.22798	-0.162604	-0.924686	0.150358	0.202913	1
392	34	Oklahoma	3	0.294323	0.390508	1.22798	-0.162604	-0.924686	0.150358	0.202913	1
501	34	Oklahoma	2	0.294323	0.390508	1.22798	-0.162604	-0.924686	0.150358	1.20291	1
506	34	Oklahoma	1	0.294323	0.390508	1.22798	-0.162604	-0.924686	0.150358	1.20291	1
750	34	Oklahoma	2	0.294323	0.390508	1.22798	-0.162604	-0.924686	0.150358	2.20291	0
870	34	Oklahoma	3	0.294323	0.390508	1.22798	-0.162604	-0.924686	0.150358	1.20291	1
204.201	34	Oklahoma	3	0.294323	0.390508	1.22798	-0.162604	-0.924686	0.150358	-1.79709	0
374.201	34	Oklahoma	2	0.294323	0.390508	1.22798	-0.162604	-0.924686	0.150358	-1.79709	0
123.201	34	Oklahoma	2	0.294323	0.390508	1.22798	-0.162604	-0.924686	0.150358	-1.79709	0
277.201	34	Oklahoma	3	0.294323	0.390508	1.22798	-0.162604	-0.924686	0.150358	-1.79709	1
116.201	34	Oklahoma	3	0.294323	0.390508	1.22798	-0.162604	-0.924686	0.150358	-1.79709	1
367.201	34	Oklahoma	3	0.294323	0.390508	1.22798	-0.162604	-0.924686	0.150358	-1.79709	1
98.2006	34	Oklahoma	3	0.294323	0.390508	1.22798	-0.162604	-0.924686	0.150358	0.202913	0
251.201	34	Oklahoma	3	0.294323	0.390508	1.22798	-0.162604	-0.924686	0.150358	0.202913	0
40.2006	34	Oklahoma	2	0.294323	0.390508	1.22798	-0.162604	-0.924686	0.150358	0.202913	1
78.2006	34	Oklahoma	3	0.294323	0.390508	1.22798	-0.162604	-0.924686	0.150358	0.202913	1
395.201	34	Oklahoma	3	0.294323	0.390508	1.22798	-0.162604	-0.924686	0.150358	0.202913	1
410.201	34	Oklahoma	3	0.294323	0.390508	1.22798	-0.162604	-0.924686	0.150358	1.20291	1
56.2006	34	Oklahoma	2	0.294323	0.390508	1.22798	-0.162604	-0.924686	0.150358	1.20291	1
140.201	34	Oklahoma	2	0.294323	0.390508	1.22798	-0.162604	-0.924686	0.150358	1.20291	0
240.201	34	Oklahoma	3	0.294323	0.390508	1.22798	-0.162604	-0.924686	0.150358	1.20291	0
420.201	34	Oklahoma	3	0.294323	0.390508	1.22798	-0.162604	-0.924686	0.150358	1.20291	0
427.201	34	Oklahoma	2	0.294323	0.390508	1.22798	-0.162604	-0.924686	0.150358	1.20291	1
17	35	Oregon	3	-0.830408	-0.834476	-0.547924	-0.700024	-0.143048	0.100137	-1.79709	0
18	35	Oregon	3	-0.830408	-0.834476	-0.547924	-0.700024	-0.143048	0.100137	-1.79709	1
52	35	Oregon	3	-0.830408	-0.834476	-0.547924	-0.700024	-0.143048	0.100137	0.202913	0
73	35	Oregon		-0.830408	-0.834476	-0.547924	-0.700024	-0.143048	0.100137	-1.79709	0
240	35	Oregon	3	-0.830408	-0.834476	-0.547924	-0.700024	-0.143048	0.100137	2.20291	1
253	35	Oregon	2	-0.830408	-0.834476	-0.547924	-0.700024	-0.143048	0.100137	-1.79709	1
368	35	Oregon	2	-0.830408	-0.834476	-0.547924	-0.700024	-0.143048	0.100137	2.20291	1
457	35	Oregon	3	-0.830408	-0.834476	-0.547924	-0.700024	-0.143048	0.100137	-1.79709	0
473	35	Oregon	2	-0.830408	-0.834476	-0.547924	-0.700024	-0.143048	0.100137	1.20291	1
570	35	Oregon	2	-0.830408	-0.834476	-0.547924	-0.700024	-0.143048	0.100137	1.20291	0
598	35	Oregon		-0.830408	-0.834476	-0.547924	-0.700024	-0.143048	0.100137	2.20291	0
600	35	Oregon	2	-0.830408	-0.834476	-0.547924	-0.700024	-0.143048	0.100137	1.20291	1
618	35	Oregon	3	-0.830408	-0.834476	-0.547924	-0.700024	-0.143048	0.100137	0.202913	1
636	35	Oregon	2	-0.830408	-0.834476	-0.547924	-0.700024	-0.143048	0.100137	1.20291	1
640	35	Oregon		-0.830408	-0.834476	-0.547924	-0.700024	-0.143048	0.100137	-1.79709	0
762	35	Oregon	2	-0.830408	-0.834476	-0.547924	-0.700024	-0.143048	0.100137	0.202913	0
963.201	35	Oregon	3	-0.830408	-0.834476	-0.547924	-0.700024	-0.143048	0.100137	-1.79709	0
985.201	35	Oregon	3	-0.830408	-0.834476	-0.547924	-0.700024	-0.143048	0.100137	-1.79709	1
938.201	35	Oregon		-0.830408	-0.834476	-0.547924	-0.700024	-0.143048	0.100137	-1.79709	0
940.201	35	Oregon	1	-0.830408	-0.834476	-0.547924	-0.700024	-0.143048	0.100137	-1.79709	1
974.201	35	Oregon	2	-0.830408	-0.834476	-0.547924	-0.700024	-0.143048	0.100137	-1.79709	1
881.201	35	Oregon	3	-0.830408	-0.834476	-0.547924	-0.700024	-0.143048	0.100137	0.202913	1
962.201	35	Oregon	2	-0.830408	-0.834476	-0.547924	-0.700024	-0.143048	0.100137	0.202913	0
993.201	35	Oregon	1	-0.830408	-0.834476	-0.547924	-0.700024	-0.143048	0.100137	1.20291	0
886.201	35	Oregon	2	-0.830408	-0.834476	-0.547924	-0.700024	-0.143048	0.100137	1.20291	0
1000.2	35	Oregon	3	-0.830408	-0.834476	-0.547924	-0.700024	-0.143048	0.100137	1.20291	1
966.201	35	Oregon	1	-0.830408	-0.834476	-0.547924	-0.700024	-0.143048	0.100137	1.20291	1
968.201	35	Oregon	2	-0.830408	-0.834476	-0.547924	-0.700024	-0.143048	0.100137	1.20291	0
948.201	35	Oregon	3	-0.830408	-0.834476	-0.547924	-0.700024	-0.143048	0.100137	2.20291	1
988.201	35	Oregon	2	-0.830408	-0.834476	-0.547924	-0.700024	-0.143048	0.100137	2.20291	1
981.201	35	Oregon	3	-0.830408	-0.834476	-0.547924	-0.700024	-0.143048	0.100137	2.20291	0
2	36	Pennsylvania	2	-0.156822	-0.117626	-0.801625	-0.513994	-0.0286032	0.0147019	1.20291	0
39	36	Pennsylvania	2	-0.156822	-0.117626	-0.801625	-0.513994	-0.0286032	0.0147019	1.20291	0
41	36	Pennsylvania	2	-0.156822	-0.117626	-0.801625	-0.513994	-0.0286032	0.0147019	1.20291	1
80	36	Pennsylvania	3	-0.156822	-0.117626	-0.801625	-0.513994	-0.0286032	0.0147019	0.202913	1
85	36	Pennsylvania	2	-0.156822	-0.117626	-0.801625	-0.513994	-0.0286032	0.0147019	2.20291	1
95	36	Pennsylvania	3	-0.156822	-0.117626	-0.801625	-0.513994	-0.0286032	0.0147019	-1.79709	1
100	36	Pennsylvania	2	-0.156822	-0.117626	-0.801625	-0.513994	-0.0286032	0.0147019	2.20291	1
102	36	Pennsylvania	2	-0.156822	-0.117626	-0.801625	-0.513994	-0.0286032	0.0147019	-1.79709	0
161	36	Pennsylvania	3	-0.156822	-0.117626	-0.801625	-0.513994	-0.0286032	0.0147019	0.202913	1
168	36	Pennsylvania	3	-0.156822	-0.117626	-0.801625	-0.513994	-0.0286032	0.0147019	-1.79709	1
182	36	Pennsylvania	2	-0.156822	-0.117626	-0.801625	-0.513994	-0.0286032	0.0147019	2.20291	0
187	36	Pennsylvania	3	-0.156822	-0.117626	-0.801625	-0.513994	-0.0286032	0.0147019	2.20291	0
195	36	Pennsylvania	1	-0.156822	-0.117626	-0.801625	-0.513994	-0.0286032	0.0147019	0.202913	0
204	36	Pennsylvania	2	-0.156822	-0.117626	-0.801625	-0.513994	-0.0286032	0.0147019	-1.79709	0
235	36	Pennsylvania	2	-0.156822	-0.117626	-0.801625	-0.513994	-0.0286032	0.0147019	-1.79709	0
306	36	Pennsylvania	2	-0.156822	-0.117626	-0.801625	-0.513994	-0.0286032	0.0147019	2.20291	0
309	36	Pennsylvania	2	-0.156822	-0.117626	-0.801625	-0.513994	-0.0286032	0.0147019	-1.79709	1
311	36	Pennsylvania	2	-0.156822	-0.117626	-0.801625	-0.513994	-0.0286032	0.0147019	-1.79709	0
312	36	Pennsylvania	2	-0.156822	-0.117626	-0.801625	-0.513994	-0.0286032	0.0147019	-1.79709	1
318	36	Pennsylvania	2	-0.156822	-0.117626	-0.801625	-0.513994	-0.0286032	0.0147019	2.20291	0
319	36	Pennsylvania	2	-0.156822	-0.117626	-0.801625	-0.513994	-0.0286032	0.0147019	0.202913	0
320	36	Pennsylvania	1	-0.156822	-0.117626	-0.801625	-0.513994	-0.0286032	0.0147019	-1.79709	1
322	36	Pennsylvania	3	-0.156822	-0.117626	-0.801625	-0.513994	-0.0286032	0.0147019	1.20291	0
330	36	Pennsylvania	3	-0.156822	-0.117626	-0.801625	-0.513994	-0.0286032	0.0147019	0.202913	0
332	36	Pennsylvania	2	-0.156822	-0.117626	-0.801625	-0.513994	-0.0286032	0.0147019	-2.79709	1
463	36	Pennsylvania	2	-0.156822	-0.117626	-0.801625	-0.513994	-0.0286032	0.0147019	-3.79709	1
597	36	Pennsylvania	2	-0.156822	-0.117626	-0.801625	-0.513994	-0.0286032	0.0147019	-2.79709	0
607	36	Pennsylvania	2	-0.156822	-0.117626	-0.801625	-0.513994	-0.0286032	0.0147019	2.20291	1
645	36	Pennsylvania	3	-0.156822	-0.117626	-0.801625	-0.513994	-0.0286032	0.0147019	-1.79709	0
646	36	Pennsylvania	1	-0.156822	-0.117626	-0.801625	-0.513994	-0.0286032	0.0147019	-1.79709	0
663	36	Pennsylvania	2	-0.156822	-0.117626	-0.801625	-0.513994	-0.0286032	0.0147019	-1.79709	1
666	36	Pennsylvania	3	-0.156822	-0.117626	-0.801625	-0.513994	-0.0286032	0.0147019	-1.79709	1
667	36	Pennsylvania	2	-0.156822	-0.117626	-0.801625	-0.513994	-0.0286032	0.0147019	1.20291	0
669	36	Pennsylvania	1	-0.156822	-0.117626	-0.801625	-0.513994	-0.0286032	0.0147019	-2.79709	1
674	36	Pennsylvania	3	-0.156822	-0.117626	-0.801625	-0.513994	-0.0286032	0.0147019	-1.79709	1
676	36	Pennsylvania	3	-0.156822	-0.117626	-0.801625	-0.513994	-0.0286032	0.0147019	2.20291	1
677	36	Pennsylvania	2	-0.156822	-0.117626	-0.801625	-0.513994	-0.0286032	0.0147019	-1.79709	0
683	36	Pennsylvania	2	-0.156822	-0.117626	-0.801625	-0.513994	-0.0286032	0.0147019	0.202913	1
699	36	Pennsylvania	1	-0.156822	-0.117626	-0.801625	-0.513994	-0.0286032	0.0147019	2.20291	0
703	36	Pennsylvania	3	-0.156822	-0.117626	-0.801625	-0.513994	-0.0286032	0.0147019	-0.797087	0
785	36	Pennsylvania	2	-0.156822	-0.117626	-0.801625	-0.513994	-0.0286032	0.0147019	1.20291	0
788	36	Pennsylvania	3	-0.156822	-0.117626	-0.801625	-0.513994	-0.0286032	0.0147019	-1.79709	1
790	36	Pennsylvania	1	-0.156822	-0.117626	-0.801625	-0.513994	-0.0286032	0.0147019	2.20291	1
793	36	Pennsylvania	2	-0.156822	-0.117626	-0.801625	-0.513994	-0.0286032	0.0147019	-1.79709	0
794	36	Pennsylvania	2	-0.156822	-0.117626	-0.801625	-0.513994	-0.0286032	0.0147019	2.20291	1
796	36	Pennsylvania	3	-0.156822	-0.117626	-0.801625	-0.513994	-0.0286032	0.0147019	-1.79709	0
914	36	Pennsylvania	3	-0.156822	-0.117626	-0.801625	-0.513994	-0.0286032	0.0147019	1.20291	0
915	36	Pennsylvania	3	-0.156822	-0.117626	-0.801625	-0.513994	-0.0286032	0.0147019	-1.79709	1
916	36	Pennsylvania	2	-0.156822	-0.117626	-0.801625	-0.513994	-0.0286032	0.0147019	-1.79709	1
917	36	Pennsylvania	2	-0.156822	-0.117626	-0.801625	-0.513994	-0.0286032	0.0147019	1.20291	0
920	36	Pennsylvania	2	-0.156822	-0.117626	-0.801625	-0.513994	-0.0286032	0.0147019	2.20291	1
922	36	Pennsylvania	2	-0.156822	-0.117626	-0.801625	-0.513994	-0.0286032	0.0147019	1.20291	1
924	36	Pennsylvania	2	-0.156822	-0.117626	-0.801625	-0.513994	-0.0286032	0.0147019	-1.79709	1
928	36	Pennsylvania	1	-0.156822	-0.117626	-0.801625	-0.513994	-0.0286032	0.0147019	0.202913	0
929	36	Pennsylvania	1	-0.156822	-0.117626	-0.801625	-0.513994	-0.0286032	0.0147019	2.20291	1
931	36	Pennsylvania	3	-0.156822	-0.117626	-0.801625	-0.513994	-0.0286032	0.0147019	-1.79709	1
934	36	Pennsylvania	3	-0.156822	-0.117626	-0.801625	-0.513994	-0.0286032	0.0147019	2.20291	1
936	36	Pennsylvania	2	-0.156822	-0.117626	-0.801625	-0.513994	-0.0286032	0.0147019	0.202913	0
939	36	Pennsylvania	2	-0.156822	-0.117626	-0.801625	-0.513994	-0.0286032	0.0147019	-2.79709	1
940	36	Pennsylvania		-0.156822	-0.117626	-0.801625	-0.513994	-0.0286032	0.0147019	1.20291	1
769.201	36	Pennsylvania	1	-0.156822	-0.117626	-0.801625	-0.513994	-0.0286032	0.0147019		1
570.201	36	Pennsylvania	2	-0.156822	-0.117626	-0.801625	-0.513994	-0.0286032	0.0147019	-2.79709	1
775.201	36	Pennsylvania	2	-0.156822	-0.117626	-0.801625	-0.513994	-0.0286032	0.0147019	-1.79709	0
440.201	36	Pennsylvania	3	-0.156822	-0.117626	-0.801625	-0.513994	-0.0286032	0.0147019	-2.79709	0
515.201	36	Pennsylvania	2	-0.156822	-0.117626	-0.801625	-0.513994	-0.0286032	0.0147019	-2.79709	0
716.201	36	Pennsylvania	3	-0.156822	-0.117626	-0.801625	-0.513994	-0.0286032	0.0147019	-1.79709	1
724.201	36	Pennsylvania		-0.156822	-0.117626	-0.801625	-0.513994	-0.0286032	0.0147019	-1.79709	1
594.201	36	Pennsylvania	1	-0.156822	-0.117626	-0.801625	-0.513994	-0.0286032	0.0147019	-1.79709	1
647.201	36	Pennsylvania	1	-0.156822	-0.117626	-0.801625	-0.513994	-0.0286032	0.0147019	-1.79709	1
653.201	36	Pennsylvania	2	-0.156822	-0.117626	-0.801625	-0.513994	-0.0286032	0.0147019	-1.79709	1
704.201	36	Pennsylvania	3	-0.156822	-0.117626	-0.801625	-0.513994	-0.0286032	0.0147019	-1.79709	1
712.201	36	Pennsylvania	2	-0.156822	-0.117626	-0.801625	-0.513994	-0.0286032	0.0147019	-1.79709	0
785.201	36	Pennsylvania	1	-0.156822	-0.117626	-0.801625	-0.513994	-0.0286032	0.0147019	-1.79709	1
472.201	36	Pennsylvania	2	-0.156822	-0.117626	-0.801625	-0.513994	-0.0286032	0.0147019	-1.79709	0
623.201	36	Pennsylvania	2	-0.156822	-0.117626	-0.801625	-0.513994	-0.0286032	0.0147019	-1.79709	0
706.201	36	Pennsylvania	3	-0.156822	-0.117626	-0.801625	-0.513994	-0.0286032	0.0147019	-1.79709	1
726.201	36	Pennsylvania		-0.156822	-0.117626	-0.801625	-0.513994	-0.0286032	0.0147019	-1.79709	1
487.201	36	Pennsylvania	3	-0.156822	-0.117626	-0.801625	-0.513994	-0.0286032	0.0147019	-1.79709	1
543.201	36	Pennsylvania	1	-0.156822	-0.117626	-0.801625	-0.513994	-0.0286032	0.0147019	-1.79709	1
664.201	36	Pennsylvania	2	-0.156822	-0.117626	-0.801625	-0.513994	-0.0286032	0.0147019	-1.79709	1
677.201	36	Pennsylvania	1	-0.156822	-0.117626	-0.801625	-0.513994	-0.0286032	0.0147019	-1.79709	1
738.201	36	Pennsylvania	2	-0.156822	-0.117626	-0.801625	-0.513994	-0.0286032	0.0147019	-1.79709	1
771.201	36	Pennsylvania	3	-0.156822	-0.117626	-0.801625	-0.513994	-0.0286032	0.0147019	-1.79709	1
450.201	36	Pennsylvania	3	-0.156822	-0.117626	-0.801625	-0.513994	-0.0286032	0.0147019	-1.79709	1
553.201	36	Pennsylvania	3	-0.156822	-0.117626	-0.801625	-0.513994	-0.0286032	0.0147019	-1.79709	1
599.201	36	Pennsylvania	3	-0.156822	-0.117626	-0.801625	-0.513994	-0.0286032	0.0147019	-3.79709	1
601.201	36	Pennsylvania	3	-0.156822	-0.117626	-0.801625	-0.513994	-0.0286032	0.0147019	-1.79709	1
659.201	36	Pennsylvania	2	-0.156822	-0.117626	-0.801625	-0.513994	-0.0286032	0.0147019	-1.79709	1
742.201	36	Pennsylvania	3	-0.156822	-0.117626	-0.801625	-0.513994	-0.0286032	0.0147019	-1.79709	0
765.201	36	Pennsylvania	2	-0.156822	-0.117626	-0.801625	-0.513994	-0.0286032	0.0147019	-1.79709	1
485.201	36	Pennsylvania	2	-0.156822	-0.117626	-0.801625	-0.513994	-0.0286032	0.0147019	0.202913	1
682.201	36	Pennsylvania	2	-0.156822	-0.117626	-0.801625	-0.513994	-0.0286032	0.0147019	0.202913	0
777.201	36	Pennsylvania	3	-0.156822	-0.117626	-0.801625	-0.513994	-0.0286032	0.0147019	0.202913	0
458.201	36	Pennsylvania		-0.156822	-0.117626	-0.801625	-0.513994	-0.0286032	0.0147019	0.202913	1
561.201	36	Pennsylvania	3	-0.156822	-0.117626	-0.801625	-0.513994	-0.0286032	0.0147019	0.202913	1
436.201	36	Pennsylvania	2	-0.156822	-0.117626	-0.801625	-0.513994	-0.0286032	0.0147019	0.202913	0
739.201	36	Pennsylvania	3	-0.156822	-0.117626	-0.801625	-0.513994	-0.0286032	0.0147019	0.202913	1
444.201	36	Pennsylvania	2	-0.156822	-0.117626	-0.801625	-0.513994	-0.0286032	0.0147019	0.202913	1
548.201	36	Pennsylvania	3	-0.156822	-0.117626	-0.801625	-0.513994	-0.0286032	0.0147019	0.202913	0
660.201	36	Pennsylvania	3	-0.156822	-0.117626	-0.801625	-0.513994	-0.0286032	0.0147019	0.202913	0
743.201	36	Pennsylvania	3	-0.156822	-0.117626	-0.801625	-0.513994	-0.0286032	0.0147019	0.202913	1
782.201	36	Pennsylvania	3	-0.156822	-0.117626	-0.801625	-0.513994	-0.0286032	0.0147019	-0.797087	1
654.201	36	Pennsylvania	3	-0.156822	-0.117626	-0.801625	-0.513994	-0.0286032	0.0147019	1.20291	1
616.201	36	Pennsylvania	2	-0.156822	-0.117626	-0.801625	-0.513994	-0.0286032	0.0147019	1.20291	0
502.201	36	Pennsylvania	1	-0.156822	-0.117626	-0.801625	-0.513994	-0.0286032	0.0147019	1.20291	1
582.201	36	Pennsylvania	1	-0.156822	-0.117626	-0.801625	-0.513994	-0.0286032	0.0147019	1.20291	1
437.201	36	Pennsylvania	2	-0.156822	-0.117626	-0.801625	-0.513994	-0.0286032	0.0147019	1.20291	1
438.201	36	Pennsylvania	2	-0.156822	-0.117626	-0.801625	-0.513994	-0.0286032	0.0147019	1.20291	1
516.201	36	Pennsylvania	3	-0.156822	-0.117626	-0.801625	-0.513994	-0.0286032	0.0147019	1.20291	1
591.201	36	Pennsylvania	2	-0.156822	-0.117626	-0.801625	-0.513994	-0.0286032	0.0147019	2.20291	1
463.201	36	Pennsylvania	2	-0.156822	-0.117626	-0.801625	-0.513994	-0.0286032	0.0147019	2.20291	1
725.201	36	Pennsylvania	2	-0.156822	-0.117626	-0.801625	-0.513994	-0.0286032	0.0147019	2.20291	1
657.201	36	Pennsylvania	3	-0.156822	-0.117626	-0.801625	-0.513994	-0.0286032	0.0147019	2.20291	0
763.201	36	Pennsylvania	2	-0.156822	-0.117626	-0.801625	-0.513994	-0.0286032	0.0147019	2.20291	1
776.201	36	Pennsylvania	2	-0.156822	-0.117626	-0.801625	-0.513994	-0.0286032	0.0147019	2.20291	1
184	37	Rhode Island	3	-0.28673	-0.417379	-0.717058	1.03626	0.390938	0.405112	-0.797087	1
378	37	Rhode Island	2	-0.28673	-0.417379	-0.717058	1.03626	0.390938	0.405112	2.20291	0
768	37	Rhode Island		-0.28673	-0.417379	-0.717058	1.03626	0.390938	0.405112	1.20291	1
769	37	Rhode Island	3	-0.28673	-0.417379	-0.717058	1.03626	0.390938	0.405112	0.202913	0
772	37	Rhode Island	3	-0.28673	-0.417379	-0.717058	1.03626	0.390938	0.405112	0.202913	0
774	37	Rhode Island	2	-0.28673	-0.417379	-0.717058	1.03626	0.390938	0.405112	1.20291	1
777	37	Rhode Island	3	-0.28673	-0.417379	-0.717058	1.03626	0.390938	0.405112	0.202913	1
740.201	37	Rhode Island	2	-0.28673	-0.417379	-0.717058	1.03626	0.390938	0.405112	-1.79709	1
539.201	37	Rhode Island	2	-0.28673	-0.417379	-0.717058	1.03626	0.390938	0.405112	-1.79709	0
496.201	37	Rhode Island	3	-0.28673	-0.417379	-0.717058	1.03626	0.390938	0.405112	0.202913	0
579.201	37	Rhode Island	2	-0.28673	-0.417379	-0.717058	1.03626	0.390938	0.405112	1.20291	0
5	38	South Carolina	2	1.60712	1.98607	0.974282	-0.741364	-1.02921	0.76302	-1.79709	0
11	38	South Carolina	3	1.60712	1.98607	0.974282	-0.741364	-1.02921	0.76302	0.202913	1
97	38	South Carolina	3	1.60712	1.98607	0.974282	-0.741364	-1.02921	0.76302	-1.79709	1
158	38	South Carolina	3	1.60712	1.98607	0.974282	-0.741364	-1.02921	0.76302	-1.79709	0
411	38	South Carolina	3	1.60712	1.98607	0.974282	-0.741364	-1.02921	0.76302	-2.79709	0
589	38	South Carolina	2	1.60712	1.98607	0.974282	-0.741364	-1.02921	0.76302	1.20291	0
728	38	South Carolina	3	1.60712	1.98607	0.974282	-0.741364	-1.02921	0.76302	-1.79709	0
828	38	South Carolina	2	1.60712	1.98607	0.974282	-0.741364	-1.02921	0.76302	2.20291	1
837	38	South Carolina	2	1.60712	1.98607	0.974282	-0.741364	-1.02921	0.76302	-1.79709	1
692.201	38	South Carolina	3	1.60712	1.98607	0.974282	-0.741364	-1.02921	0.76302	-1.79709	1
580.201	38	South Carolina	3	1.60712	1.98607	0.974282	-0.741364	-1.02921	0.76302	-1.79709	1
524.201	38	South Carolina	3	1.60712	1.98607	0.974282	-0.741364	-1.02921	0.76302	0.202913	1
525.201	38	South Carolina		1.60712	1.98607	0.974282	-0.741364	-1.02921	0.76302	0.202913	1
462.201	38	South Carolina	2	1.60712	1.98607	0.974282	-0.741364	-1.02921	0.76302	1.20291	1
169	39	South Dakota	3	-0.562658	-0.353921	-0.125089	1.40832	-0.241512	-0.340125	0.202913	0
424	39	South Dakota	3	-0.562658	-0.353921	-0.125089	1.40832	-0.241512	-0.340125	-1.79709	0
642	39	South Dakota		-0.562658	-0.353921	-0.125089	1.40832	-0.241512	-0.340125	1.20291	1
662	39	South Dakota	3	-0.562658	-0.353921	-0.125089	1.40832	-0.241512	-0.340125	0.202913	1
726	39	South Dakota	2	-0.562658	-0.353921	-0.125089	1.40832	-0.241512	-0.340125	1.20291	1
831.201	39	South Dakota	2	-0.562658	-0.353921	-0.125089	1.40832	-0.241512	-0.340125	-1.79709	0
52.2006	39	South Dakota	3	-0.562658	-0.353921	-0.125089	1.40832	-0.241512	-0.340125	-1.79709	1
47.2006	39	South Dakota	1	-0.562658	-0.353921	-0.125089	1.40832	-0.241512	-0.340125	0.202913	1
308.201	39	South Dakota	3	-0.562658	-0.353921	-0.125089	1.40832	-0.241512	-0.340125	0.202913	0
799.201	39	South Dakota	3	-0.562658	-0.353921	-0.125089	1.40832	-0.241512	-0.340125	1.20291	0
301.201	39	South Dakota	3	-0.562658	-0.353921	-0.125089	1.40832	-0.241512	-0.340125	2.20291	1
118	40	Tennessee	2	0.930835	0.815638	1.31255	-0.265954	-0.673505	0.179121	-0.797087	0
211	40	Tennessee	2	0.930835	0.815638	1.31255	-0.265954	-0.673505	0.179121	0.202913	1
407	40	Tennessee	2	0.930835	0.815638	1.31255	-0.265954	-0.673505	0.179121	-2.79709	0
543	40	Tennessee	1	0.930835	0.815638	1.31255	-0.265954	-0.673505	0.179121	-1.79709	0
557	40	Tennessee	3	0.930835	0.815638	1.31255	-0.265954	-0.673505	0.179121	-1.79709	1
558	40	Tennessee	3	0.930835	0.815638	1.31255	-0.265954	-0.673505	0.179121	-1.79709	1
561	40	Tennessee	3	0.930835	0.815638	1.31255	-0.265954	-0.673505	0.179121	0.202913	1
563	40	Tennessee	3	0.930835	0.815638	1.31255	-0.265954	-0.673505	0.179121	-1.79709	1
575	40	Tennessee	3	0.930835	0.815638	1.31255	-0.265954	-0.673505	0.179121	0.202913	0
652	40	Tennessee	2	0.930835	0.815638	1.31255	-0.265954	-0.673505	0.179121	1.20291	1
653	40	Tennessee	3	0.930835	0.815638	1.31255	-0.265954	-0.673505	0.179121	-2.79709	1
739	40	Tennessee	3	0.930835	0.815638	1.31255	-0.265954	-0.673505	0.179121	-2.79709	0
852	40	Tennessee	2	0.930835	0.815638	1.31255	-0.265954	-0.673505	0.179121	2.20291	1
854	40	Tennessee	2	0.930835	0.815638	1.31255	-0.265954	-0.673505	0.179121	1.20291	0
858	40	Tennessee	2	0.930835	0.815638	1.31255	-0.265954	-0.673505	0.179121	-2.79709	0
428.201	40	Tennessee	3	0.930835	0.815638	1.31255	-0.265954	-0.673505	0.179121	-1.79709	1
455.201	40	Tennessee	2	0.930835	0.815638	1.31255	-0.265954	-0.673505	0.179121	-1.79709	1
566.201	40	Tennessee	2	0.930835	0.815638	1.31255	-0.265954	-0.673505	0.179121	-1.79709	1
255.201	40	Tennessee	3	0.930835	0.815638	1.31255	-0.265954	-0.673505	0.179121	-1.79709	1
279.201	40	Tennessee	3	0.930835	0.815638	1.31255	-0.265954	-0.673505	0.179121	-1.79709	1
209.201	40	Tennessee	3	0.930835	0.815638	1.31255	-0.265954	-0.673505	0.179121	-1.79709	0
315.201	40	Tennessee	2	0.930835	0.815638	1.31255	-0.265954	-0.673505	0.179121	-1.79709	0
401.201	40	Tennessee	2	0.930835	0.815638	1.31255	-0.265954	-0.673505	0.179121	-1.79709	0
467.201	40	Tennessee	3	0.930835	0.815638	1.31255	-0.265954	-0.673505	0.179121	-3.79709	0
309.201	40	Tennessee	3	0.930835	0.815638	1.31255	-0.265954	-0.673505	0.179121	0.202913	1
403.201	40	Tennessee	2	0.930835	0.815638	1.31255	-0.265954	-0.673505	0.179121	0.202913	0
736.201	40	Tennessee	3	0.930835	0.815638	1.31255	-0.265954	-0.673505	0.179121	0.202913	1
139.201	40	Tennessee	1	0.930835	0.815638	1.31255	-0.265954	-0.673505	0.179121	0.202913	1
673.201	40	Tennessee	3	0.930835	0.815638	1.31255	-0.265954	-0.673505	0.179121	0.202913	1
674.201	40	Tennessee	1	0.930835	0.815638	1.31255	-0.265954	-0.673505	0.179121	0.202913	0
473.201	40	Tennessee	3	0.930835	0.815638	1.31255	-0.265954	-0.673505	0.179121	0.202913	0
701.201	40	Tennessee	2	0.930835	0.815638	1.31255	-0.265954	-0.673505	0.179121	0.202913	1
83.2006	40	Tennessee	3	0.930835	0.815638	1.31255	-0.265954	-0.673505	0.179121	0.202913	1
228.201	40	Tennessee	3	0.930835	0.815638	1.31255	-0.265954	-0.673505	0.179121	0.202913	1
238.201	40	Tennessee	3	0.930835	0.815638	1.31255	-0.265954	-0.673505	0.179121	0.202913	1
225.201	40	Tennessee	3	0.930835	0.815638	1.31255	-0.265954	-0.673505	0.179121	1.20291	1
324.201	40	Tennessee	2	0.930835	0.815638	1.31255	-0.265954	-0.673505	0.179121	1.20291	1
105.201	40	Tennessee	2	0.930835	0.815638	1.31255	-0.265954	-0.673505	0.179121	1.20291	1
254.201	40	Tennessee		0.930835	0.815638	1.31255	-0.265954	-0.673505	0.179121	1.20291	1
128.201	40	Tennessee	3	0.930835	0.815638	1.31255	-0.265954	-0.673505	0.179121	1.20291	0
287.201	40	Tennessee	3	0.930835	0.815638	1.31255	-0.265954	-0.673505	0.179121	1.20291	1
697.201	40	Tennessee	2	0.930835	0.815638	1.31255	-0.265954	-0.673505	0.179121	2.20291	0
126.201	40	Tennessee	2	0.930835	0.815638	1.31255	-0.265954	-0.673505	0.179121	2.20291	1
134.201	40	Tennessee	2	0.930835	0.815638	1.31255	-0.265954	-0.673505	0.179121	2.20291	1
252.201	40	Tennessee	3	0.930835	0.815638	1.31255	-0.265954	-0.673505	0.179121	2.20291	1
13	41	Texas	3	0.543627	0.557387	1.90452	-0.190164	-0.174802	0.0332411	-2.79709	0
14	41	Texas	2	0.543627	0.557387	1.90452	-0.190164	-0.174802	0.0332411	1.20291	1
92	41	Texas	1	0.543627	0.557387	1.90452	-0.190164	-0.174802	0.0332411	0.202913	0
98	41	Texas	3	0.543627	0.557387	1.90452	-0.190164	-0.174802	0.0332411	-1.79709	0
108	41	Texas	3	0.543627	0.557387	1.90452	-0.190164	-0.174802	0.0332411	0.202913	1
114	41	Texas	3	0.543627	0.557387	1.90452	-0.190164	-0.174802	0.0332411	1.20291	1
117	41	Texas	1	0.543627	0.557387	1.90452	-0.190164	-0.174802	0.0332411	0.202913	1
122	41	Texas	3	0.543627	0.557387	1.90452	-0.190164	-0.174802	0.0332411	-1.79709	1
123	41	Texas		0.543627	0.557387	1.90452	-0.190164	-0.174802	0.0332411	1.20291	0
124	41	Texas		0.543627	0.557387	1.90452	-0.190164	-0.174802	0.0332411	1.20291	0
214	41	Texas	2	0.543627	0.557387	1.90452	-0.190164	-0.174802	0.0332411	-1.79709	1
215	41	Texas	3	0.543627	0.557387	1.90452	-0.190164	-0.174802	0.0332411	2.20291	0
219	41	Texas	2	0.543627	0.557387	1.90452	-0.190164	-0.174802	0.0332411	1.20291	1
220	41	Texas	2	0.543627	0.557387	1.90452	-0.190164	-0.174802	0.0332411	2.20291	1
222	41	Texas	3	0.543627	0.557387	1.90452	-0.190164	-0.174802	0.0332411	-1.79709	1
230	41	Texas	2	0.543627	0.557387	1.90452	-0.190164	-0.174802	0.0332411	2.20291	1
334	41	Texas	3	0.543627	0.557387	1.90452	-0.190164	-0.174802	0.0332411	-1.79709	0
335	41	Texas	2	0.543627	0.557387	1.90452	-0.190164	-0.174802	0.0332411	-1.79709	1
336	41	Texas	2	0.543627	0.557387	1.90452	-0.190164	-0.174802	0.0332411	-1.79709	1
339	41	Texas	3	0.543627	0.557387	1.90452	-0.190164	-0.174802	0.0332411	0.202913	0
341	41	Texas	3	0.543627	0.557387	1.90452	-0.190164	-0.174802	0.0332411	-1.79709	0
342	41	Texas	3	0.543627	0.557387	1.90452	-0.190164	-0.174802	0.0332411	0.202913	1
345	41	Texas	3	0.543627	0.557387	1.90452	-0.190164	-0.174802	0.0332411	0.202913	0
346	41	Texas	3	0.543627	0.557387	1.90452	-0.190164	-0.174802	0.0332411	2.20291	0
348	41	Texas	3	0.543627	0.557387	1.90452	-0.190164	-0.174802	0.0332411	-1.79709	0
384	41	Texas	3	0.543627	0.557387	1.90452	-0.190164	-0.174802	0.0332411	1.20291	1
389	41	Texas	3	0.543627	0.557387	1.90452	-0.190164	-0.174802	0.0332411	0.202913	1
391	41	Texas	2	0.543627	0.557387	1.90452	-0.190164	-0.174802	0.0332411	2.20291	1
399	41	Texas	2	0.543627	0.557387	1.90452	-0.190164	-0.174802	0.0332411	0.202913	0
409	41	Texas		0.543627	0.557387	1.90452	-0.190164	-0.174802	0.0332411	1.20291	0
471	41	Texas	2	0.543627	0.557387	1.90452	-0.190164	-0.174802	0.0332411	0.202913	1
477	41	Texas	3	0.543627	0.557387	1.90452	-0.190164	-0.174802	0.0332411	-1.79709	1
481	41	Texas	3	0.543627	0.557387	1.90452	-0.190164	-0.174802	0.0332411	2.20291	1
487	41	Texas	3	0.543627	0.557387	1.90452	-0.190164	-0.174802	0.0332411	-1.79709	1
490	41	Texas	3	0.543627	0.557387	1.90452	-0.190164	-0.174802	0.0332411	1.20291	0
491	41	Texas	3	0.543627	0.557387	1.90452	-0.190164	-0.174802	0.0332411	-1.79709	0
497	41	Texas	2	0.543627	0.557387	1.90452	-0.190164	-0.174802	0.0332411	-1.79709	0
499	41	Texas	3	0.543627	0.557387	1.90452	-0.190164	-0.174802	0.0332411	-1.79709	0
503	41	Texas	2	0.543627	0.557387	1.90452	-0.190164	-0.174802	0.0332411	2.20291	0
505	41	Texas	2	0.543627	0.557387	1.90452	-0.190164	-0.174802	0.0332411	2.20291	1
507	41	Texas	2	0.543627	0.557387	1.90452	-0.190164	-0.174802	0.0332411	1.20291	0
508	41	Texas	3	0.543627	0.557387	1.90452	-0.190164	-0.174802	0.0332411	-1.79709	1
521	41	Texas	1	0.543627	0.557387	1.90452	-0.190164	-0.174802	0.0332411	-3.79709	1
613	41	Texas	2	0.543627	0.557387	1.90452	-0.190164	-0.174802	0.0332411	1.20291	0
615	41	Texas	2	0.543627	0.557387	1.90452	-0.190164	-0.174802	0.0332411	0.202913	1
631	41	Texas	2	0.543627	0.557387	1.90452	-0.190164	-0.174802	0.0332411	0.202913	1
654	41	Texas	3	0.543627	0.557387	1.90452	-0.190164	-0.174802	0.0332411	1.20291	1
659	41	Texas		0.543627	0.557387	1.90452	-0.190164	-0.174802	0.0332411	1.20291	0
747	41	Texas	3	0.543627	0.557387	1.90452	-0.190164	-0.174802	0.0332411	0.202913	1
748	41	Texas	3	0.543627	0.557387	1.90452	-0.190164	-0.174802	0.0332411	0.202913	1
751	41	Texas		0.543627	0.557387	1.90452	-0.190164	-0.174802	0.0332411	-1.79709	1
753	41	Texas	2	0.543627	0.557387	1.90452	-0.190164	-0.174802	0.0332411	-0.797087	0
755	41	Texas	3	0.543627	0.557387	1.90452	-0.190164	-0.174802	0.0332411	-3.79709	1
862	41	Texas	3	0.543627	0.557387	1.90452	-0.190164	-0.174802	0.0332411	1.20291	0
864	41	Texas		0.543627	0.557387	1.90452	-0.190164	-0.174802	0.0332411	1.20291	1
866	41	Texas	2	0.543627	0.557387	1.90452	-0.190164	-0.174802	0.0332411	-1.79709	1
868	41	Texas	3	0.543627	0.557387	1.90452	-0.190164	-0.174802	0.0332411	1.20291	0
869	41	Texas	3	0.543627	0.557387	1.90452	-0.190164	-0.174802	0.0332411	1.20291	0
871	41	Texas	2	0.543627	0.557387	1.90452	-0.190164	-0.174802	0.0332411	2.20291	1
872	41	Texas	3	0.543627	0.557387	1.90452	-0.190164	-0.174802	0.0332411	-1.79709	0
873	41	Texas	2	0.543627	0.557387	1.90452	-0.190164	-0.174802	0.0332411	1.20291	0
874	41	Texas	2	0.543627	0.557387	1.90452	-0.190164	-0.174802	0.0332411	2.20291	1
996	41	Texas	3	0.543627	0.557387	1.90452	-0.190164	-0.174802	0.0332411	-1.79709	0
997	41	Texas	1	0.543627	0.557387	1.90452	-0.190164	-0.174802	0.0332411	2.20291	1
999	41	Texas	3	0.543627	0.557387	1.90452	-0.190164	-0.174802	0.0332411	0.202913	1
104.201	41	Texas	3	0.543627	0.557387	1.90452	-0.190164	-0.174802	0.0332411	-1.79709	1
250.201	41	Texas	2	0.543627	0.557387	1.90452	-0.190164	-0.174802	0.0332411	-1.79709	1
392.201	41	Texas	1	0.543627	0.557387	1.90452	-0.190164	-0.174802	0.0332411	-2.79709	0
96.2006	41	Texas	3	0.543627	0.557387	1.90452	-0.190164	-0.174802	0.0332411	-1.79709	1
236.201	41	Texas	3	0.543627	0.557387	1.90452	-0.190164	-0.174802	0.0332411	-1.79709	0
333.201	41	Texas	1	0.543627	0.557387	1.90452	-0.190164	-0.174802	0.0332411	-2.79709	0
378.201	41	Texas	3	0.543627	0.557387	1.90452	-0.190164	-0.174802	0.0332411	-1.79709	0
35.2006	41	Texas	2	0.543627	0.557387	1.90452	-0.190164	-0.174802	0.0332411	-1.79709	0
138.201	41	Texas	3	0.543627	0.557387	1.90452	-0.190164	-0.174802	0.0332411	-1.79709	1
193.201	41	Texas	2	0.543627	0.557387	1.90452	-0.190164	-0.174802	0.0332411	-1.79709	1
219.201	41	Texas	2	0.543627	0.557387	1.90452	-0.190164	-0.174802	0.0332411	-1.79709	1
382.201	41	Texas	2	0.543627	0.557387	1.90452	-0.190164	-0.174802	0.0332411	-1.79709	0
412.201	41	Texas	3	0.543627	0.557387	1.90452	-0.190164	-0.174802	0.0332411	-1.79709	1
14.2006	41	Texas	3	0.543627	0.557387	1.90452	-0.190164	-0.174802	0.0332411	-1.79709	0
93.2006	41	Texas	2	0.543627	0.557387	1.90452	-0.190164	-0.174802	0.0332411	-1.79709	1
106.201	41	Texas	3	0.543627	0.557387	1.90452	-0.190164	-0.174802	0.0332411	-1.79709	1
118.201	41	Texas	3	0.543627	0.557387	1.90452	-0.190164	-0.174802	0.0332411	-1.79709	1
364.201	41	Texas	3	0.543627	0.557387	1.90452	-0.190164	-0.174802	0.0332411	-1.79709	1
132.201	41	Texas	2	0.543627	0.557387	1.90452	-0.190164	-0.174802	0.0332411	-1.79709	1
312.201	41	Texas	3	0.543627	0.557387	1.90452	-0.190164	-0.174802	0.0332411	-1.79709	1
340.201	41	Texas	2	0.543627	0.557387	1.90452	-0.190164	-0.174802	0.0332411	-1.79709	1
350.201	41	Texas	3	0.543627	0.557387	1.90452	-0.190164	-0.174802	0.0332411	-1.79709	1
396.201	41	Texas	3	0.543627	0.557387	1.90452	-0.190164	-0.174802	0.0332411	-1.79709	1
811.201	41	Texas	3	0.543627	0.557387	1.90452	-0.190164	-0.174802	0.0332411	-1.79709	1
835.201	41	Texas	3	0.543627	0.557387	1.90452	-0.190164	-0.174802	0.0332411	-2.79709	0
377.201	41	Texas	3	0.543627	0.557387	1.90452	-0.190164	-0.174802	0.0332411	0.202913	1
43.2006	41	Texas	3	0.543627	0.557387	1.90452	-0.190164	-0.174802	0.0332411	0.202913	1
155.201	41	Texas	2	0.543627	0.557387	1.90452	-0.190164	-0.174802	0.0332411	-0.797087	1
264.201	41	Texas	2	0.543627	0.557387	1.90452	-0.190164	-0.174802	0.0332411	0.202913	0
295.201	41	Texas	2	0.543627	0.557387	1.90452	-0.190164	-0.174802	0.0332411	0.202913	1
311.201	41	Texas	2	0.543627	0.557387	1.90452	-0.190164	-0.174802	0.0332411	0.202913	0
381.201	41	Texas	1	0.543627	0.557387	1.90452	-0.190164	-0.174802	0.0332411	0.202913	0
72.2006	41	Texas	3	0.543627	0.557387	1.90452	-0.190164	-0.174802	0.0332411	0.202913	1
163.201	41	Texas	3	0.543627	0.557387	1.90452	-0.190164	-0.174802	0.0332411	0.202913	1
180.201	41	Texas		0.543627	0.557387	1.90452	-0.190164	-0.174802	0.0332411	0.202913	1
256.201	41	Texas	3	0.543627	0.557387	1.90452	-0.190164	-0.174802	0.0332411	0.202913	1
290.201	41	Texas	2	0.543627	0.557387	1.90452	-0.190164	-0.174802	0.0332411	0.202913	0
354.201	41	Texas	2	0.543627	0.557387	1.90452	-0.190164	-0.174802	0.0332411	0.202913	0
399.201	41	Texas	2	0.543627	0.557387	1.90452	-0.190164	-0.174802	0.0332411	0.202913	0
424.201	41	Texas	2	0.543627	0.557387	1.90452	-0.190164	-0.174802	0.0332411	0.202913	1
73.2006	41	Texas	2	0.543627	0.557387	1.90452	-0.190164	-0.174802	0.0332411	0.202913	0
129.201	41	Texas	2	0.543627	0.557387	1.90452	-0.190164	-0.174802	0.0332411	0.202913	0
179.201	41	Texas	3	0.543627	0.557387	1.90452	-0.190164	-0.174802	0.0332411	0.202913	1
286.201	41	Texas	3	0.543627	0.557387	1.90452	-0.190164	-0.174802	0.0332411	0.202913	1
331.201	41	Texas	2	0.543627	0.557387	1.90452	-0.190164	-0.174802	0.0332411	0.202913	1
816.201	41	Texas	3	0.543627	0.557387	1.90452	-0.190164	-0.174802	0.0332411	0.202913	0
307.201	41	Texas	1	0.543627	0.557387	1.90452	-0.190164	-0.174802	0.0332411	0.202913	0
109.201	41	Texas	2	0.543627	0.557387	1.90452	-0.190164	-0.174802	0.0332411	1.20291	0
71.2006	41	Texas	1	0.543627	0.557387	1.90452	-0.190164	-0.174802	0.0332411	1.20291	1
320.201	41	Texas	3	0.543627	0.557387	1.90452	-0.190164	-0.174802	0.0332411	1.20291	1
343.201	41	Texas	3	0.543627	0.557387	1.90452	-0.190164	-0.174802	0.0332411	1.20291	1
387.201	41	Texas	2	0.543627	0.557387	1.90452	-0.190164	-0.174802	0.0332411	1.20291	1
17.2006	41	Texas	2	0.543627	0.557387	1.90452	-0.190164	-0.174802	0.0332411	1.20291	1
36.2006	41	Texas	3	0.543627	0.557387	1.90452	-0.190164	-0.174802	0.0332411	1.20291	1
77.2006	41	Texas	3	0.543627	0.557387	1.90452	-0.190164	-0.174802	0.0332411	1.20291	1
195.201	41	Texas	2	0.543627	0.557387	1.90452	-0.190164	-0.174802	0.0332411	1.20291	1
400.201	41	Texas	1	0.543627	0.557387	1.90452	-0.190164	-0.174802	0.0332411	1.20291	0
409.201	41	Texas	3	0.543627	0.557387	1.90452	-0.190164	-0.174802	0.0332411	1.20291	0
7.2006	41	Texas	1	0.543627	0.557387	1.90452	-0.190164	-0.174802	0.0332411	1.20291	0
41.2006	41	Texas	2	0.543627	0.557387	1.90452	-0.190164	-0.174802	0.0332411	1.20291	1
81.2006	41	Texas	1	0.543627	0.557387	1.90452	-0.190164	-0.174802	0.0332411	1.20291	1
133.201	41	Texas	3	0.543627	0.557387	1.90452	-0.190164	-0.174802	0.0332411	1.20291	1
175.201	41	Texas	2	0.543627	0.557387	1.90452	-0.190164	-0.174802	0.0332411	1.20291	0
181.201	41	Texas	3	0.543627	0.557387	1.90452	-0.190164	-0.174802	0.0332411	1.20291	0
206.201	41	Texas	2	0.543627	0.557387	1.90452	-0.190164	-0.174802	0.0332411	1.20291	0
261.201	41	Texas	3	0.543627	0.557387	1.90452	-0.190164	-0.174802	0.0332411	1.20291	0
267.201	41	Texas	2	0.543627	0.557387	1.90452	-0.190164	-0.174802	0.0332411	1.20291	1
273.201	41	Texas	1	0.543627	0.557387	1.90452	-0.190164	-0.174802	0.0332411	1.20291	1
274.201	41	Texas	1	0.543627	0.557387	1.90452	-0.190164	-0.174802	0.0332411	1.20291	1
289.201	41	Texas	3	0.543627	0.557387	1.90452	-0.190164	-0.174802	0.0332411	1.20291	0
394.201	41	Texas	3	0.543627	0.557387	1.90452	-0.190164	-0.174802	0.0332411	1.20291	1
417.201	41	Texas	2	0.543627	0.557387	1.90452	-0.190164	-0.174802	0.0332411	1.20291	1
422.201	41	Texas	3	0.543627	0.557387	1.90452	-0.190164	-0.174802	0.0332411	1.20291	0
429.201	41	Texas	1	0.543627	0.557387	1.90452	-0.190164	-0.174802	0.0332411	1.20291	1
823.201	41	Texas	1	0.543627	0.557387	1.90452	-0.190164	-0.174802	0.0332411	1.20291	0
29.2006	41	Texas	2	0.543627	0.557387	1.90452	-0.190164	-0.174802	0.0332411	1.20291	0
113.201	41	Texas	2	0.543627	0.557387	1.90452	-0.190164	-0.174802	0.0332411	1.20291	1
130.201	41	Texas	3	0.543627	0.557387	1.90452	-0.190164	-0.174802	0.0332411	1.20291	0
162.201	41	Texas		0.543627	0.557387	1.90452	-0.190164	-0.174802	0.0332411	1.20291	1
203.201	41	Texas	3	0.543627	0.557387	1.90452	-0.190164	-0.174802	0.0332411	1.20291	0
302.201	41	Texas	3	0.543627	0.557387	1.90452	-0.190164	-0.174802	0.0332411	1.20291	0
419.201	41	Texas	3	0.543627	0.557387	1.90452	-0.190164	-0.174802	0.0332411	1.20291	1
82.2006	41	Texas	1	0.543627	0.557387	1.90452	-0.190164	-0.174802	0.0332411	1.20291	1
205.201	41	Texas	2	0.543627	0.557387	1.90452	-0.190164	-0.174802	0.0332411	1.20291	1
284.201	41	Texas	2	0.543627	0.557387	1.90452	-0.190164	-0.174802	0.0332411	1.20291	0
408.201	41	Texas	3	0.543627	0.557387	1.90452	-0.190164	-0.174802	0.0332411	1.20291	1
151.201	41	Texas	2	0.543627	0.557387	1.90452	-0.190164	-0.174802	0.0332411	2.20291	1
172.201	41	Texas	2	0.543627	0.557387	1.90452	-0.190164	-0.174802	0.0332411	2.20291	1
229.201	41	Texas	2	0.543627	0.557387	1.90452	-0.190164	-0.174802	0.0332411	2.20291	0
390.201	41	Texas		0.543627	0.557387	1.90452	-0.190164	-0.174802	0.0332411	2.20291	0
246.201	41	Texas	2	0.543627	0.557387	1.90452	-0.190164	-0.174802	0.0332411	2.20291	1
86.2006	41	Texas	2	0.543627	0.557387	1.90452	-0.190164	-0.174802	0.0332411	2.20291	1
269.201	41	Texas	3	0.543627	0.557387	1.90452	-0.190164	-0.174802	0.0332411	2.20291	1
407.201	41	Texas	2	0.543627	0.557387	1.90452	-0.190164	-0.174802	0.0332411	2.20291	0
351.201	41	Texas	2	0.543627	0.557387	1.90452	-0.190164	-0.174802	0.0332411	2.20291	0
46	42	Utah	2	-0.98579	-1.40366	-0.547924	0.622856	-0.128563	-0.0800762	1.20291	1
350	42	Utah	3	-0.98579	-1.40366	-0.547924	0.622856	-0.128563	-0.0800762	0.202913	0
352	42	Utah	3	-0.98579	-1.40366	-0.547924	0.622856	-0.128563	-0.0800762	1.20291	1
354	42	Utah	2	-0.98579	-1.40366	-0.547924	0.622856	-0.128563	-0.0800762	-1.79709	0
358	42	Utah	2	-0.98579	-1.40366	-0.547924	0.622856	-0.128563	-0.0800762	2.20291	1
410	42	Utah	2	-0.98579	-1.40366	-0.547924	0.622856	-0.128563	-0.0800762	-2.79709	1
539	42	Utah	3	-0.98579	-1.40366	-0.547924	0.622856	-0.128563	-0.0800762	0.202913	1
542	42	Utah	3	-0.98579	-1.40366	-0.547924	0.622856	-0.128563	-0.0800762	0.202913	1
549	42	Utah	2	-0.98579	-1.40366	-0.547924	0.622856	-0.128563	-0.0800762	2.20291	1
879	42	Utah	2	-0.98579	-1.40366	-0.547924	0.622856	-0.128563	-0.0800762	0.202913	0
4.2006	42	Utah	3	-0.98579	-1.40366	-0.547924	0.622856	-0.128563	-0.0800762	-1.79709	0
787.201	42	Utah	2	-0.98579	-1.40366	-0.547924	0.622856	-0.128563	-0.0800762	-1.79709	1
815.201	42	Utah	3	-0.98579	-1.40366	-0.547924	0.622856	-0.128563	-0.0800762	-1.79709	1
844.201	42	Utah	3	-0.98579	-1.40366	-0.547924	0.622856	-0.128563	-0.0800762	-2.79709	0
846.201	42	Utah	1	-0.98579	-1.40366	-0.547924	0.622856	-0.128563	-0.0800762	-1.79709	0
843.201	42	Utah	3	-0.98579	-1.40366	-0.547924	0.622856	-0.128563	-0.0800762	-1.79709	1
797.201	42	Utah	2	-0.98579	-1.40366	-0.547924	0.622856	-0.128563	-0.0800762	0.202913	0
803.201	42	Utah	2	-0.98579	-1.40366	-0.547924	0.622856	-0.128563	-0.0800762	0.202913	0
818.201	42	Utah	2	-0.98579	-1.40366	-0.547924	0.622856	-0.128563	-0.0800762	0.202913	1
806.201	42	Utah	2	-0.98579	-1.40366	-0.547924	0.622856	-0.128563	-0.0800762	0.202913	1
792.201	42	Utah		-0.98579	-1.40366	-0.547924	0.622856	-0.128563	-0.0800762	0.202913	1
832.201	42	Utah	3	-0.98579	-1.40366	-0.547924	0.622856	-0.128563	-0.0800762	0.202913	1
851.201	42	Utah	3	-0.98579	-1.40366	-0.547924	0.622856	-0.128563	-0.0800762	1.20291	0
825.201	42	Utah	3	-0.98579	-1.40366	-0.547924	0.622856	-0.128563	-0.0800762	1.20291	1
840.201	42	Utah	2	-0.98579	-1.40366	-0.547924	0.622856	-0.128563	-0.0800762	1.20291	0
788.201	42	Utah	2	-0.98579	-1.40366	-0.547924	0.622856	-0.128563	-0.0800762	1.20291	0
859.201	42	Utah	2	-0.98579	-1.40366	-0.547924	0.622856	-0.128563	-0.0800762	1.20291	0
7	44	Vermont	3	-1.20211	-1.60508	-1.73186	0.705536	-0.0258411	-0.0182318	0.202913	1
595	44	Vermont	3	-1.20211	-1.60508	-1.73186	0.705536	-0.0258411	-0.0182318	0.202913	0
609	44	Vermont	2	-1.20211	-1.60508	-1.73186	0.705536	-0.0258411	-0.0182318	2.20291	0
619	44	Vermont	2	-1.20211	-1.60508	-1.73186	0.705536	-0.0258411	-0.0182318	0.202913	1
598.201	44	Vermont	1	-1.20211	-1.60508	-1.73186	0.705536	-0.0258411	-0.0182318	0.202913	0
672.201	44	Vermont	2	-1.20211	-1.60508	-1.73186	0.705536	-0.0258411	-0.0182318	1.20291	0
84	43	Virginia	3	0.0526886	0.0846639	-0.463357	-0.596674	0.963058	-0.574631	-1.79709	1
99	43	Virginia	1	0.0526886	0.0846639	-0.463357	-0.596674	0.963058	-0.574631	-1.79709	1
105	43	Virginia	2	0.0526886	0.0846639	-0.463357	-0.596674	0.963058	-0.574631	0.202913	1
137	43	Virginia	2	0.0526886	0.0846639	-0.463357	-0.596674	0.963058	-0.574631	-1.79709	1
149	43	Virginia	3	0.0526886	0.0846639	-0.463357	-0.596674	0.963058	-0.574631	0.202913	1
272	43	Virginia	2	0.0526886	0.0846639	-0.463357	-0.596674	0.963058	-0.574631	0.202913	0
278	43	Virginia	3	0.0526886	0.0846639	-0.463357	-0.596674	0.963058	-0.574631	-1.79709	1
284	43	Virginia	3	0.0526886	0.0846639	-0.463357	-0.596674	0.963058	-0.574631	-1.79709	1
370	43	Virginia	2	0.0526886	0.0846639	-0.463357	-0.596674	0.963058	-0.574631	-1.79709	0
375	43	Virginia	3	0.0526886	0.0846639	-0.463357	-0.596674	0.963058	-0.574631	0.202913	0
581	43	Virginia	2	0.0526886	0.0846639	-0.463357	-0.596674	0.963058	-0.574631	1.20291	0
612	43	Virginia	3	0.0526886	0.0846639	-0.463357	-0.596674	0.963058	-0.574631	0.202913	1
635	43	Virginia	3	0.0526886	0.0846639	-0.463357	-0.596674	0.963058	-0.574631	1.20291	1
707	43	Virginia	3	0.0526886	0.0846639	-0.463357	-0.596674	0.963058	-0.574631	-1.79709	1
732	43	Virginia	2	0.0526886	0.0846639	-0.463357	-0.596674	0.963058	-0.574631	1.20291	1
734	43	Virginia	3	0.0526886	0.0846639	-0.463357	-0.596674	0.963058	-0.574631	-1.79709	0
741	43	Virginia	3	0.0526886	0.0846639	-0.463357	-0.596674	0.963058	-0.574631	2.20291	0
826	43	Virginia	3	0.0526886	0.0846639	-0.463357	-0.596674	0.963058	-0.574631	-1.79709	0
829	43	Virginia	2	0.0526886	0.0846639	-0.463357	-0.596674	0.963058	-0.574631	2.20291	0
838	43	Virginia	2	0.0526886	0.0846639	-0.463357	-0.596674	0.963058	-0.574631	-1.79709	0
846	43	Virginia	3	0.0526886	0.0846639	-0.463357	-0.596674	0.963058	-0.574631	-1.79709	0
847	43	Virginia	3	0.0526886	0.0846639	-0.463357	-0.596674	0.963058	-0.574631	1.20291	1
972	43	Virginia	2	0.0526886	0.0846639	-0.463357	-0.596674	0.963058	-0.574631	-1.79709	0
978	43	Virginia	3	0.0526886	0.0846639	-0.463357	-0.596674	0.963058	-0.574631	1.20291	0
981	43	Virginia	2	0.0526886	0.0846639	-0.463357	-0.596674	0.963058	-0.574631	1.20291	1
986	43	Virginia	3	0.0526886	0.0846639	-0.463357	-0.596674	0.963058	-0.574631	1.20291	1
993	43	Virginia	3	0.0526886	0.0846639	-0.463357	-0.596674	0.963058	-0.574631	-1.79709	0
652.201	43	Virginia	2	0.0526886	0.0846639	-0.463357	-0.596674	0.963058	-0.574631		0
571.201	43	Virginia	3	0.0526886	0.0846639	-0.463357	-0.596674	0.963058	-0.574631	-1.79709	0
741.201	43	Virginia	2	0.0526886	0.0846639	-0.463357	-0.596674	0.963058	-0.574631	0.202913	0
521.201	43	Virginia	3	0.0526886	0.0846639	-0.463357	-0.596674	0.963058	-0.574631	0.202913	1
707.201	43	Virginia	3	0.0526886	0.0846639	-0.463357	-0.596674	0.963058	-0.574631	0.202913	1
477.201	43	Virginia	2	0.0526886	0.0846639	-0.463357	-0.596674	0.963058	-0.574631	-0.797087	0
519.201	43	Virginia	2	0.0526886	0.0846639	-0.463357	-0.596674	0.963058	-0.574631	0.202913	1
644.201	43	Virginia	2	0.0526886	0.0846639	-0.463357	-0.596674	0.963058	-0.574631	0.202913	1
748.201	43	Virginia	2	0.0526886	0.0846639	-0.463357	-0.596674	0.963058	-0.574631	1.20291	1
675.201	43	Virginia	3	0.0526886	0.0846639	-0.463357	-0.596674	0.963058	-0.574631	1.20291	0
722.201	43	Virginia	3	0.0526886	0.0846639	-0.463357	-0.596674	0.963058	-0.574631	2.20291	0
50	45	Washington	1	-0.619019	-0.587806	-0.717058	0.250796	0.659436	0.165384	0.202913	0
61	45	Washington	3	-0.619019	-0.587806	-0.717058	0.250796	0.659436	0.165384	-1.79709	1
72	45	Washington	3	-0.619019	-0.587806	-0.717058	0.250796	0.659436	0.165384	1.20291	0
237	45	Washington	2	-0.619019	-0.587806	-0.717058	0.250796	0.659436	0.165384	0.202913	1
238	45	Washington	3	-0.619019	-0.587806	-0.717058	0.250796	0.659436	0.165384	0.202913	1
246	45	Washington	3	-0.619019	-0.587806	-0.717058	0.250796	0.659436	0.165384	1.20291	1
248	45	Washington	3	-0.619019	-0.587806	-0.717058	0.250796	0.659436	0.165384	-0.797087	1
252	45	Washington	1	-0.619019	-0.587806	-0.717058	0.250796	0.659436	0.165384	0.202913	1
258	45	Washington	1	-0.619019	-0.587806	-0.717058	0.250796	0.659436	0.165384	1.20291	1
259	45	Washington	3	-0.619019	-0.587806	-0.717058	0.250796	0.659436	0.165384	1.20291	0
373	45	Washington	3	-0.619019	-0.587806	-0.717058	0.250796	0.659436	0.165384	-1.79709	1
450	45	Washington	3	-0.619019	-0.587806	-0.717058	0.250796	0.659436	0.165384	0.202913	1
472	45	Washington	2	-0.619019	-0.587806	-0.717058	0.250796	0.659436	0.165384	1.20291	0
475	45	Washington	2	-0.619019	-0.587806	-0.717058	0.250796	0.659436	0.165384	1.20291	0
478	45	Washington	2	-0.619019	-0.587806	-0.717058	0.250796	0.659436	0.165384	1.20291	0
479	45	Washington	2	-0.619019	-0.587806	-0.717058	0.250796	0.659436	0.165384	-2.79709	0
480	45	Washington	2	-0.619019	-0.587806	-0.717058	0.250796	0.659436	0.165384	0.202913	0
483	45	Washington	2	-0.619019	-0.587806	-0.717058	0.250796	0.659436	0.165384	0.202913	1
517	45	Washington	2	-0.619019	-0.587806	-0.717058	0.250796	0.659436	0.165384	1.20291	1
522	45	Washington	2	-0.619019	-0.587806	-0.717058	0.250796	0.659436	0.165384	1.20291	1
526	45	Washington	3	-0.619019	-0.587806	-0.717058	0.250796	0.659436	0.165384	1.20291	1
528	45	Washington	2	-0.619019	-0.587806	-0.717058	0.250796	0.659436	0.165384	1.20291	0
534	45	Washington	1	-0.619019	-0.587806	-0.717058	0.250796	0.659436	0.165384	0.202913	0
560	45	Washington	2	-0.619019	-0.587806	-0.717058	0.250796	0.659436	0.165384	0.202913	0
562	45	Washington	1	-0.619019	-0.587806	-0.717058	0.250796	0.659436	0.165384	0.202913	1
596	45	Washington	3	-0.619019	-0.587806	-0.717058	0.250796	0.659436	0.165384	0.202913	0
602	45	Washington	3	-0.619019	-0.587806	-0.717058	0.250796	0.659436	0.165384	1.20291	0
626	45	Washington	2	-0.619019	-0.587806	-0.717058	0.250796	0.659436	0.165384	1.20291	1
655	45	Washington	2	-0.619019	-0.587806	-0.717058	0.250796	0.659436	0.165384	0.202913	0
661	45	Washington	3	-0.619019	-0.587806	-0.717058	0.250796	0.659436	0.165384	-1.79709	0
765	45	Washington	2	-0.619019	-0.587806	-0.717058	0.250796	0.659436	0.165384	0.202913	0
766	45	Washington	2	-0.619019	-0.587806	-0.717058	0.250796	0.659436	0.165384	2.20291	1
894	45	Washington	2	-0.619019	-0.587806	-0.717058	0.250796	0.659436	0.165384	-1.79709	1
895	45	Washington	3	-0.619019	-0.587806	-0.717058	0.250796	0.659436	0.165384	-1.79709	1
896	45	Washington	2	-0.619019	-0.587806	-0.717058	0.250796	0.659436	0.165384	0.202913	0
900	45	Washington	2	-0.619019	-0.587806	-0.717058	0.250796	0.659436	0.165384	1.20291	0
906	45	Washington	2	-0.619019	-0.587806	-0.717058	0.250796	0.659436	0.165384	0.202913	1
909	45	Washington	3	-0.619019	-0.587806	-0.717058	0.250796	0.659436	0.165384	-1.79709	1
912	45	Washington	3	-0.619019	-0.587806	-0.717058	0.250796	0.659436	0.165384	1.20291	0
1001	45	Washington	3	-0.619019	-0.587806	-0.717058	0.250796	0.659436	0.165384	0.202913	0
1003	45	Washington	2	-0.619019	-0.587806	-0.717058	0.250796	0.659436	0.165384	0.202913	1
957.201	45	Washington	2	-0.619019	-0.587806	-0.717058	0.250796	0.659436	0.165384	-1.79709	0
965.201	45	Washington	3	-0.619019	-0.587806	-0.717058	0.250796	0.659436	0.165384	-2.79709	1
980.201	45	Washington	1	-0.619019	-0.587806	-0.717058	0.250796	0.659436	0.165384	-1.79709	1
944.201	45	Washington	2	-0.619019	-0.587806	-0.717058	0.250796	0.659436	0.165384	0.202913	1
912.201	45	Washington	2	-0.619019	-0.587806	-0.717058	0.250796	0.659436	0.165384	0.202913	0
909.201	45	Washington	2	-0.619019	-0.587806	-0.717058	0.250796	0.659436	0.165384	0.202913	1
970.201	45	Washington		-0.619019	-0.587806	-0.717058	0.250796	0.659436	0.165384	0.202913	0
900.201	45	Washington	3	-0.619019	-0.587806	-0.717058	0.250796	0.659436	0.165384	0.202913	0
950.201	45	Washington	2	-0.619019	-0.587806	-0.717058	0.250796	0.659436	0.165384	-0.797087	0
977.201	45	Washington	3	-0.619019	-0.587806	-0.717058	0.250796	0.659436	0.165384	0.202913	1
1001.2	45	Washington	3	-0.619019	-0.587806	-0.717058	0.250796	0.659436	0.165384	0.202913	1
895.201	45	Washington	3	-0.619019	-0.587806	-0.717058	0.250796	0.659436	0.165384	1.20291	0
941.201	45	Washington	1	-0.619019	-0.587806	-0.717058	0.250796	0.659436	0.165384	1.20291	0
976.201	45	Washington	3	-0.619019	-0.587806	-0.717058	0.250796	0.659436	0.165384	1.20291	1
983.201	45	Washington	3	-0.619019	-0.587806	-0.717058	0.250796	0.659436	0.165384	1.20291	1
883.201	45	Washington	2	-0.619019	-0.587806	-0.717058	0.250796	0.659436	0.165384	1.20291	1
894.201	45	Washington	1	-0.619019	-0.587806	-0.717058	0.250796	0.659436	0.165384	1.20291	1
998.201	45	Washington	2	-0.619019	-0.587806	-0.717058	0.250796	0.659436	0.165384	1.20291	1
891.201	45	Washington	1	-0.619019	-0.587806	-0.717058	0.250796	0.659436	0.165384	1.20291	0
949.201	45	Washington	2	-0.619019	-0.587806	-0.717058	0.250796	0.659436	0.165384	2.20291	1
989.201	45	Washington	2	-0.619019	-0.587806	-0.717058	0.250796	0.659436	0.165384	2.20291	0
967.201	45	Washington		-0.619019	-0.587806	-0.717058	0.250796	0.659436	0.165384	2.20291	0
86	47	West Virginia	2	-1.27533	-1.29334	0.297746	0.044096	-1.52279	-0.0671491	2.20291	0
273	47	West Virginia	2	-1.27533	-1.29334	0.297746	0.044096	-1.52279	-0.0671491	1.20291	1
394	47	West Virginia	1	-1.27533	-1.29334	0.297746	0.044096	-1.52279	-0.0671491	-0.797087	0
398	47	West Virginia	3	-1.27533	-1.29334	0.297746	0.044096	-1.52279	-0.0671491	-1.79709	0
432	47	West Virginia	3	-1.27533	-1.29334	0.297746	0.044096	-1.52279	-0.0671491	-1.79709	1
784.201	47	West Virginia	3	-1.27533	-1.29334	0.297746	0.044096	-1.52279	-0.0671491	-1.79709	1
565.201	47	West Virginia	2	-1.27533	-1.29334	0.297746	0.044096	-1.52279	-0.0671491	-2.79709	0
636.201	47	West Virginia	2	-1.27533	-1.29334	0.297746	0.044096	-1.52279	-0.0671491	-1.79709	1
666.201	47	West Virginia	3	-1.27533	-1.29334	0.297746	0.044096	-1.52279	-0.0671491	0.202913	1
634.201	47	West Virginia	2	-1.27533	-1.29334	0.297746	0.044096	-1.52279	-0.0671491	0.202913	0
651.201	47	West Virginia	3	-1.27533	-1.29334	0.297746	0.044096	-1.52279	-0.0671491	0.202913	1
639.201	47	West Virginia	3	-1.27533	-1.29334	0.297746	0.044096	-1.52279	-0.0671491	1.20291	1
584.201	47	West Virginia	2	-1.27533	-1.29334	0.297746	0.044096	-1.52279	-0.0671491	1.20291	1
606.201	47	West Virginia	1	-1.27533	-1.29334	0.297746	0.044096	-1.52279	-0.0671491	2.20291	1
64	46	Wisconsin	2	0.00194304	0.24177	-0.801625	0.333476	-0.0399219	-0.013313	1.20291	1
127	46	Wisconsin	2	0.00194304	0.24177	-0.801625	0.333476	-0.0399219	-0.013313	1.20291	1
131	46	Wisconsin	2	0.00194304	0.24177	-0.801625	0.333476	-0.0399219	-0.013313	0.202913	0
134	46	Wisconsin	2	0.00194304	0.24177	-0.801625	0.333476	-0.0399219	-0.013313	1.20291	1
138	46	Wisconsin	3	0.00194304	0.24177	-0.801625	0.333476	-0.0399219	-0.013313	-1.79709	0
292	46	Wisconsin	3	0.00194304	0.24177	-0.801625	0.333476	-0.0399219	-0.013313	0.202913	1
293	46	Wisconsin	3	0.00194304	0.24177	-0.801625	0.333476	-0.0399219	-0.013313	1.20291	1
299	46	Wisconsin	3	0.00194304	0.24177	-0.801625	0.333476	-0.0399219	-0.013313	-1.79709	1
423	46	Wisconsin	2	0.00194304	0.24177	-0.801625	0.333476	-0.0399219	-0.013313	-1.79709	1
588	46	Wisconsin	3	0.00194304	0.24177	-0.801625	0.333476	-0.0399219	-0.013313	-1.79709	1
591	46	Wisconsin	2	0.00194304	0.24177	-0.801625	0.333476	-0.0399219	-0.013313	2.20291	0
660	46	Wisconsin	1	0.00194304	0.24177	-0.801625	0.333476	-0.0399219	-0.013313	2.20291	0
672	46	Wisconsin	3	0.00194304	0.24177	-0.801625	0.333476	-0.0399219	-0.013313	2.20291	1
690	46	Wisconsin	2	0.00194304	0.24177	-0.801625	0.333476	-0.0399219	-0.013313	-1.79709	0
702	46	Wisconsin	3	0.00194304	0.24177	-0.801625	0.333476	-0.0399219	-0.013313	-1.79709	1
704	46	Wisconsin	3	0.00194304	0.24177	-0.801625	0.333476	-0.0399219	-0.013313	0.202913	1
809	46	Wisconsin	3	0.00194304	0.24177	-0.801625	0.333476	-0.0399219	-0.013313	2.20291	1
817	46	Wisconsin	2	0.00194304	0.24177	-0.801625	0.333476	-0.0399219	-0.013313	-1.79709	0
956	46	Wisconsin	1	0.00194304	0.24177	-0.801625	0.333476	-0.0399219	-0.013313	1.20291	0
964	46	Wisconsin	3	0.00194304	0.24177	-0.801625	0.333476	-0.0399219	-0.013313	-1.79709	1
969	46	Wisconsin	3	0.00194304	0.24177	-0.801625	0.333476	-0.0399219	-0.013313	0.202913	0
67.2006	46	Wisconsin		0.00194304	0.24177	-0.801625	0.333476	-0.0399219	-0.013313	-1.79709	0
102.201	46	Wisconsin	3	0.00194304	0.24177	-0.801625	0.333476	-0.0399219	-0.013313	-1.79709	1
33.2006	46	Wisconsin	2	0.00194304	0.24177	-0.801625	0.333476	-0.0399219	-0.013313	-1.79709	0
294.201	46	Wisconsin	2	0.00194304	0.24177	-0.801625	0.333476	-0.0399219	-0.013313	-1.79709	0
363.201	46	Wisconsin	3	0.00194304	0.24177	-0.801625	0.333476	-0.0399219	-0.013313	-1.79709	0
366.201	46	Wisconsin		0.00194304	0.24177	-0.801625	0.333476	-0.0399219	-0.013313	-1.79709	0
418.201	46	Wisconsin	1	0.00194304	0.24177	-0.801625	0.333476	-0.0399219	-0.013313	-2.79709	0
147.201	46	Wisconsin	2	0.00194304	0.24177	-0.801625	0.333476	-0.0399219	-0.013313	-1.79709	1
275.201	46	Wisconsin	2	0.00194304	0.24177	-0.801625	0.333476	-0.0399219	-0.013313	-1.79709	1
388.201	46	Wisconsin	1	0.00194304	0.24177	-0.801625	0.333476	-0.0399219	-0.013313	-1.79709	1
18.2006	46	Wisconsin	2	0.00194304	0.24177	-0.801625	0.333476	-0.0399219	-0.013313	-2.79709	1
22.2006	46	Wisconsin		0.00194304	0.24177	-0.801625	0.333476	-0.0399219	-0.013313	-3.79709	0
292.201	46	Wisconsin	3	0.00194304	0.24177	-0.801625	0.333476	-0.0399219	-0.013313	-2.79709	0
323.201	46	Wisconsin	2	0.00194304	0.24177	-0.801625	0.333476	-0.0399219	-0.013313	-1.79709	0
352.201	46	Wisconsin	2	0.00194304	0.24177	-0.801625	0.333476	-0.0399219	-0.013313	-1.79709	1
357.201	46	Wisconsin	2	0.00194304	0.24177	-0.801625	0.333476	-0.0399219	-0.013313	-3.79709	1
186.201	46	Wisconsin	2	0.00194304	0.24177	-0.801625	0.333476	-0.0399219	-0.013313	0.202913	0
376.201	46	Wisconsin	3	0.00194304	0.24177	-0.801625	0.333476	-0.0399219	-0.013313	-0.797087	0
299.201	46	Wisconsin	2	0.00194304	0.24177	-0.801625	0.333476	-0.0399219	-0.013313	0.202913	1
176.201	46	Wisconsin	2	0.00194304	0.24177	-0.801625	0.333476	-0.0399219	-0.013313	0.202913	1
305.201	46	Wisconsin	2	0.00194304	0.24177	-0.801625	0.333476	-0.0399219	-0.013313	0.202913	1
384.201	46	Wisconsin	2	0.00194304	0.24177	-0.801625	0.333476	-0.0399219	-0.013313	0.202913	0
241.201	46	Wisconsin	3	0.00194304	0.24177	-0.801625	0.333476	-0.0399219	-0.013313	0.202913	1
74.2006	46	Wisconsin	2	0.00194304	0.24177	-0.801625	0.333476	-0.0399219	-0.013313	0.202913	0
231.201	46	Wisconsin	2	0.00194304	0.24177	-0.801625	0.333476	-0.0399219	-0.013313	0.202913	1
244.201	46	Wisconsin	3	0.00194304	0.24177	-0.801625	0.333476	-0.0399219	-0.013313	0.202913	0
296.201	46	Wisconsin	2	0.00194304	0.24177	-0.801625	0.333476	-0.0399219	-0.013313	0.202913	0
369.201	46	Wisconsin	2	0.00194304	0.24177	-0.801625	0.333476	-0.0399219	-0.013313	0.202913	0
149.201	46	Wisconsin	2	0.00194304	0.24177	-0.801625	0.333476	-0.0399219	-0.013313	1.20291	0
173.201	46	Wisconsin	2	0.00194304	0.24177	-0.801625	0.333476	-0.0399219	-0.013313	1.20291	0
44.2006	46	Wisconsin	2	0.00194304	0.24177	-0.801625	0.333476	-0.0399219	-0.013313	1.20291	1
190.201	46	Wisconsin	2	0.00194304	0.24177	-0.801625	0.333476	-0.0399219	-0.013313	1.20291	0
55.2006	46	Wisconsin	2	0.00194304	0.24177	-0.801625	0.333476	-0.0399219	-0.013313	1.20291	1
99.2006	46	Wisconsin	2	0.00194304	0.24177	-0.801625	0.333476	-0.0399219	-0.013313	1.20291	0
178.201	46	Wisconsin	3	0.00194304	0.24177	-0.801625	0.333476	-0.0399219	-0.013313	1.20291	1
379.201	46	Wisconsin	2	0.00194304	0.24177	-0.801625	0.333476	-0.0399219	-0.013313	1.20291	0
346.201	46	Wisconsin	2	0.00194304	0.24177	-0.801625	0.333476	-0.0399219	-0.013313	1.20291	0
54.2006	46	Wisconsin	1	0.00194304	0.24177	-0.801625	0.333476	-0.0399219	-0.013313	2.20291	0
183.201	46	Wisconsin	3	0.00194304	0.24177	-0.801625	0.333476	-0.0399219	-0.013313	2.20291	0
208.201	46	Wisconsin	2	0.00194304	0.24177	-0.801625	0.333476	-0.0399219	-0.013313	2.20291	1
317.201	46	Wisconsin	2	0.00194304	0.24177	-0.801625	0.333476	-0.0399219	-0.013313	2.20291	1
[truncated: 6 more rows]

## Sheet: Test Non-Hispanic White
case.id	state	state.code	press2free	c.g.white	teen.birth.white	climate	wealth	climate.x.wealth	edu.cnt	male.dummy
32	Alabama	1	2	-0.901855	1.14015	-1.23744	-1.10867	1.37191	-1.79709	1
199	Alabama	1	1	-0.901855	1.14015	-1.23744	-1.10867	1.37191	-1.79709	0
202	Alabama	1	2	-0.901855	1.14015	-1.23744	-1.10867	1.37191	-1.79709	1
402	Alabama	1	2	-0.901855	1.14015	-1.23744	-1.10867	1.37191	1.20291	0
536	Alabama	1	3	-0.901855	1.14015	-1.23744	-1.10867	1.37191	2.20291	0
556	Alabama	1	3	-0.901855	1.14015	-1.23744	-1.10867	1.37191	2.20291	1
568	Alabama	1		-0.901855	1.14015	-1.23744	-1.10867	1.37191	-1.79709	1
610	Alabama	1	3	-0.901855	1.14015	-1.23744	-1.10867	1.37191	2.20291	1
740	Alabama	1	3	-0.901855	1.14015	-1.23744	-1.10867	1.37191	0.202913	0
743	Alabama	1	2	-0.901855	1.14015	-1.23744	-1.10867	1.37191	-1.79709	0
746	Alabama	1	2	-0.901855	1.14015	-1.23744	-1.10867	1.37191	1.20291	0
752	Alabama	1	2	-0.901855	1.14015	-1.23744	-1.10867	1.37191	0.202913	0
857	Alabama	1	1	-0.901855	1.14015	-1.23744	-1.10867	1.37191	0.202913	0
861	Alabama	1	3	-0.901855	1.14015	-1.23744	-1.10867	1.37191	-2.79709	1
75.2006	Alabama	1	3	-0.901855	1.14015	-1.23744	-1.10867	1.37191	-1.79709	0
268.201	Alabama	1	3	-0.901855	1.14015	-1.23744	-1.10867	1.37191	-1.79709	0
112.201	Alabama	1	3	-0.901855	1.14015	-1.23744	-1.10867	1.37191	-1.79709	1
159.201	Alabama	1	2	-0.901855	1.14015	-1.23744	-1.10867	1.37191	-1.79709	0
60.2006	Alabama	1	3	-0.901855	1.14015	-1.23744	-1.10867	1.37191	-1.79709	0
413.201	Alabama	1	3	-0.901855	1.14015	-1.23744	-1.10867	1.37191	-0.797087	1
398.201	Alabama	1	3	-0.901855	1.14015	-1.23744	-1.10867	1.37191	0.202913	0
76.2006	Alabama	1	3	-0.901855	1.14015	-1.23744	-1.10867	1.37191	-0.797087	1
124.201	Alabama	1	3	-0.901855	1.14015	-1.23744	-1.10867	1.37191	1.20291	0
402.201	Alabama	1	3	-0.901855	1.14015	-1.23744	-1.10867	1.37191	1.20291	1
201.201	Alabama	1	3	-0.901855	1.14015	-1.23744	-1.10867	1.37191	1.20291	0
425.201	Alabama	1	2	-0.901855	1.14015	-1.23744	-1.10867	1.37191	1.20291	0
313.201	Alabama	1	2	-0.901855	1.14015	-1.23744	-1.10867	1.37191	1.20291	0
26.2006	Alabama	1	2	-0.901855	1.14015	-1.23744	-1.10867	1.37191	2.20291	0
97.2006	Alabama	1	3	-0.901855	1.14015	-1.23744	-1.10867	1.37191	2.20291	0
225	Arizona	3	3	0.599301	-0.0715221	-0.576004	-0.267169	0.15389	-1.79709	1
229	Arizona	3	2	0.599301	-0.0715221	-0.576004	-0.267169	0.15389	1.20291	0
233	Arizona	3	3	0.599301	-0.0715221	-0.576004	-0.267169	0.15389	0.202913	0
356	Arizona	3	3	0.599301	-0.0715221	-0.576004	-0.267169	0.15389	-2.79709	1
413	Arizona	3	3	0.599301	-0.0715221	-0.576004	-0.267169	0.15389	1.20291	0
757	Arizona	3	3	0.599301	-0.0715221	-0.576004	-0.267169	0.15389	2.20291	0
759	Arizona	3	2	0.599301	-0.0715221	-0.576004	-0.267169	0.15389	1.20291	0
880	Arizona	3	2	0.599301	-0.0715221	-0.576004	-0.267169	0.15389	2.20291	0
881	Arizona	3	2	0.599301	-0.0715221	-0.576004	-0.267169	0.15389	1.20291	1
802.201	Arizona	3	1	0.599301	-0.0715221	-0.576004	-0.267169	0.15389	-1.79709	1
791.201	Arizona	3	2	0.599301	-0.0715221	-0.576004	-0.267169	0.15389	-1.79709	1
805.201	Arizona	3	3	0.599301	-0.0715221	-0.576004	-0.267169	0.15389	-1.79709	0
820.201	Arizona	3	3	0.599301	-0.0715221	-0.576004	-0.267169	0.15389	-1.79709	0
830.201	Arizona	3	3	0.599301	-0.0715221	-0.576004	-0.267169	0.15389	-1.79709	0
853.201	Arizona	3	2	0.599301	-0.0715221	-0.576004	-0.267169	0.15389	-1.79709	1
857.201	Arizona	3	2	0.599301	-0.0715221	-0.576004	-0.267169	0.15389	-1.79709	1
810.201	Arizona	3	2	0.599301	-0.0715221	-0.576004	-0.267169	0.15389	-1.79709	1
822.201	Arizona	3	3	0.599301	-0.0715221	-0.576004	-0.267169	0.15389	-1.79709	1
876.201	Arizona	3	3	0.599301	-0.0715221	-0.576004	-0.267169	0.15389	-1.79709	0
837.201	Arizona	3	2	0.599301	-0.0715221	-0.576004	-0.267169	0.15389	0.202913	0
814.201	Arizona	3	2	0.599301	-0.0715221	-0.576004	-0.267169	0.15389	0.202913	0
865.201	Arizona	3	2	0.599301	-0.0715221	-0.576004	-0.267169	0.15389	0.202913	1
848.201	Arizona	3	2	0.599301	-0.0715221	-0.576004	-0.267169	0.15389	1.20291	0
829.201	Arizona	3	3	0.599301	-0.0715221	-0.576004	-0.267169	0.15389	1.20291	0
839.201	Arizona	3	2	0.599301	-0.0715221	-0.576004	-0.267169	0.15389	1.20291	0
793.201	Arizona	3	3	0.599301	-0.0715221	-0.576004	-0.267169	0.15389	1.20291	0
821.201	Arizona	3	2	0.599301	-0.0715221	-0.576004	-0.267169	0.15389	1.20291	0
868.201	Arizona	3	3	0.599301	-0.0715221	-0.576004	-0.267169	0.15389	1.20291	0
833.201	Arizona	3	2	0.599301	-0.0715221	-0.576004	-0.267169	0.15389	2.20291	0
794.201	Arizona	3	3	0.599301	-0.0715221	-0.576004	-0.267169	0.15389	2.20291	1
841.201	Arizona	3	2	0.599301	-0.0715221	-0.576004	-0.267169	0.15389	2.20291	0
223	Arkansas	2	3	0.576589	2.14987	-0.369304	-1.31175	0.484433	0.202913	1
224	Arkansas	2	3	0.576589	2.14987	-0.369304	-1.31175	0.484433	-1.79709	1
231	Arkansas	2	1	0.576589	2.14987	-0.369304	-1.31175	0.484433	-3.79709	1
236	Arkansas	2	3	0.576589	2.14987	-0.369304	-1.31175	0.484433	-1.79709	1
344	Arkansas	2	3	0.576589	2.14987	-0.369304	-1.31175	0.484433	-3.79709	1
395	Arkansas	2	2	0.576589	2.14987	-0.369304	-1.31175	0.484433	2.20291	0
396	Arkansas	2	3	0.576589	2.14987	-0.369304	-1.31175	0.484433	-1.79709	0
401	Arkansas	2	2	0.576589	2.14987	-0.369304	-1.31175	0.484433	1.20291	0
498	Arkansas	2	3	0.576589	2.14987	-0.369304	-1.31175	0.484433	0.202913	1
516	Arkansas	2	3	0.576589	2.14987	-0.369304	-1.31175	0.484433	1.20291	1
749	Arkansas	2	3	0.576589	2.14987	-0.369304	-1.31175	0.484433	1.20291	0
875	Arkansas	2	2	0.576589	2.14987	-0.369304	-1.31175	0.484433	2.20291	1
146.201	Arkansas	2	2	0.576589	2.14987	-0.369304	-1.31175	0.484433	-1.79709	1
202.201	Arkansas	2	2	0.576589	2.14987	-0.369304	-1.31175	0.484433	-1.79709	0
85.2006	Arkansas	2	2	0.576589	2.14987	-0.369304	-1.31175	0.484433	-1.79709	1
169.201	Arkansas	2	3	0.576589	2.14987	-0.369304	-1.31175	0.484433	-1.79709	1
406.201	Arkansas	2	3	0.576589	2.14987	-0.369304	-1.31175	0.484433	-2.79709	1
321.201	Arkansas	2	2	0.576589	2.14987	-0.369304	-1.31175	0.484433	0.202913	0
91.2006	Arkansas	2	2	0.576589	2.14987	-0.369304	-1.31175	0.484433	0.202913	0
330.201	Arkansas	2	3	0.576589	2.14987	-0.369304	-1.31175	0.484433	0.202913	1
211.201	Arkansas	2	3	0.576589	2.14987	-0.369304	-1.31175	0.484433	1.20291	0
92.2006	Arkansas	2	2	0.576589	2.14987	-0.369304	-1.31175	0.484433	1.20291	0
283.201	Arkansas	2	2	0.576589	2.14987	-0.369304	-1.31175	0.484433	2.20291	0
53	California	4	1	-0.297438	-1.18222	-1.34079	0.951322	-1.27553	1.20291	0
56	California	4	2	-0.297438	-1.18222	-1.34079	0.951322	-1.27553	2.20291	0
57	California	4	2	-0.297438	-1.18222	-1.34079	0.951322	-1.27553	1.20291	0
59	California	4	2	-0.297438	-1.18222	-1.34079	0.951322	-1.27553	1.20291	0
62	California	4	2	-0.297438	-1.18222	-1.34079	0.951322	-1.27553	1.20291	1
241	California	4	2	-0.297438	-1.18222	-1.34079	0.951322	-1.27553	2.20291	0
242	California	4	3	-0.297438	-1.18222	-1.34079	0.951322	-1.27553	1.20291	0
243	California	4	2	-0.297438	-1.18222	-1.34079	0.951322	-1.27553	1.20291	0
245	California	4	2	-0.297438	-1.18222	-1.34079	0.951322	-1.27553	2.20291	0
247	California	4	2	-0.297438	-1.18222	-1.34079	0.951322	-1.27553	0.202913	0
249	California	4	1	-0.297438	-1.18222	-1.34079	0.951322	-1.27553	2.20291	0
250	California	4	3	-0.297438	-1.18222	-1.34079	0.951322	-1.27553	0.202913	1
251	California	4	2	-0.297438	-1.18222	-1.34079	0.951322	-1.27553	0.202913	0
254	California	4		-0.297438	-1.18222	-1.34079	0.951322	-1.27553	1.20291	0
260	California	4	3	-0.297438	-1.18222	-1.34079	0.951322	-1.27553	1.20291	0
261	California	4	3	-0.297438	-1.18222	-1.34079	0.951322	-1.27553	2.20291	0
264	California	4	2	-0.297438	-1.18222	-1.34079	0.951322	-1.27553	-1.79709	0
265	California	4	3	-0.297438	-1.18222	-1.34079	0.951322	-1.27553	0.202913	1
267	California	4	2	-0.297438	-1.18222	-1.34079	0.951322	-1.27553	2.20291	0
363	California	4	1	-0.297438	-1.18222	-1.34079	0.951322	-1.27553	0.202913	0
364	California	4	1	-0.297438	-1.18222	-1.34079	0.951322	-1.27553	0.202913	0
366	California	4	3	-0.297438	-1.18222	-1.34079	0.951322	-1.27553	2.20291	0
447	California	4	2	-0.297438	-1.18222	-1.34079	0.951322	-1.27553	0.202913	1
449	California	4	3	-0.297438	-1.18222	-1.34079	0.951322	-1.27553	0.202913	1
452	California	4	3	-0.297438	-1.18222	-1.34079	0.951322	-1.27553	-1.79709	1
455	California	4	2	-0.297438	-1.18222	-1.34079	0.951322	-1.27553	-1.79709	0
470	California	4	2	-0.297438	-1.18222	-1.34079	0.951322	-1.27553	0.202913	1
476	California	4	2	-0.297438	-1.18222	-1.34079	0.951322	-1.27553	1.20291	0
485	California	4	2	-0.297438	-1.18222	-1.34079	0.951322	-1.27553	2.20291	0
486	California	4	2	-0.297438	-1.18222	-1.34079	0.951322	-1.27553	2.20291	1
495	California	4	2	-0.297438	-1.18222	-1.34079	0.951322	-1.27553	2.20291	0
504	California	4	3	-0.297438	-1.18222	-1.34079	0.951322	-1.27553	-1.79709	0
513	California	4	3	-0.297438	-1.18222	-1.34079	0.951322	-1.27553	0.202913	1
518	California	4	2	-0.297438	-1.18222	-1.34079	0.951322	-1.27553	0.202913	1
520	California	4	3	-0.297438	-1.18222	-1.34079	0.951322	-1.27553	-0.797087	1
523	California	4	2	-0.297438	-1.18222	-1.34079	0.951322	-1.27553	1.20291	1
530	California	4	2	-0.297438	-1.18222	-1.34079	0.951322	-1.27553	0.202913	1
532	California	4	1	-0.297438	-1.18222	-1.34079	0.951322	-1.27553	1.20291	1
533	California	4	3	-0.297438	-1.18222	-1.34079	0.951322	-1.27553	1.20291	1
548	California	4	1	-0.297438	-1.18222	-1.34079	0.951322	-1.27553	2.20291	1
553	California	4	1	-0.297438	-1.18222	-1.34079	0.951322	-1.27553	0.202913	1
555	California	4	2	-0.297438	-1.18222	-1.34079	0.951322	-1.27553	-1.79709	1
559	California	4		-0.297438	-1.18222	-1.34079	0.951322	-1.27553	0.202913	0
564	California	4	1	-0.297438	-1.18222	-1.34079	0.951322	-1.27553	1.20291	1
614	California	4	3	-0.297438	-1.18222	-1.34079	0.951322	-1.27553	2.20291	1
623	California	4	2	-0.297438	-1.18222	-1.34079	0.951322	-1.27553	2.20291	1
624	California	4	3	-0.297438	-1.18222	-1.34079	0.951322	-1.27553	0.202913	1
628	California	4	1	-0.297438	-1.18222	-1.34079	0.951322	-1.27553	0.202913	1
630	California	4	2	-0.297438	-1.18222	-1.34079	0.951322	-1.27553	0.202913	0
632	California	4	2	-0.297438	-1.18222	-1.34079	0.951322	-1.27553	-1.79709	0
634	California	4	3	-0.297438	-1.18222	-1.34079	0.951322	-1.27553	2.20291	0
638	California	4	2	-0.297438	-1.18222	-1.34079	0.951322	-1.27553	2.20291	0
639	California	4	3	-0.297438	-1.18222	-1.34079	0.951322	-1.27553	0.202913	1
761	California	4	3	-0.297438	-1.18222	-1.34079	0.951322	-1.27553	0.202913	0
764	California	4	2	-0.297438	-1.18222	-1.34079	0.951322	-1.27553	2.20291	0
889	California	4	2	-0.297438	-1.18222	-1.34079	0.951322	-1.27553	0.202913	1
891	California	4	3	-0.297438	-1.18222	-1.34079	0.951322	-1.27553	0.202913	1
892	California	4	2	-0.297438	-1.18222	-1.34079	0.951322	-1.27553	2.20291	1
893	California	4	2	-0.297438	-1.18222	-1.34079	0.951322	-1.27553	-1.79709	1
897	California	4	2	-0.297438	-1.18222	-1.34079	0.951322	-1.27553	2.20291	1
898	California	4	3	-0.297438	-1.18222	-1.34079	0.951322	-1.27553	-0.797087	1
901	California	4	2	-0.297438	-1.18222	-1.34079	0.951322	-1.27553	1.20291	0
903	California	4	2	-0.297438	-1.18222	-1.34079	0.951322	-1.27553	-1.79709	0
905	California	4	2	-0.297438	-1.18222	-1.34079	0.951322	-1.27553	1.20291	0
907	California	4	2	-0.297438	-1.18222	-1.34079	0.951322	-1.27553	0.202913	1
910	California	4	2	-0.297438	-1.18222	-1.34079	0.951322	-1.27553	1.20291	0
913	California	4	3	-0.297438	-1.18222	-1.34079	0.951322	-1.27553	1.20291	1
1002	California	4	2	-0.297438	-1.18222	-1.34079	0.951322	-1.27553	1.20291	1
887.201	California	4	2	-0.297438	-1.18222	-1.34079	0.951322	-1.27553	-2.79709	0
935.201	California	4	2	-0.297438	-1.18222	-1.34079	0.951322	-1.27553	-2.79709	0
971.201	California	4	3	-0.297438	-1.18222	-1.34079	0.951322	-1.27553	-1.79709	0
896.201	California	4	1	-0.297438	-1.18222	-1.34079	0.951322	-1.27553	-1.79709	0
932.201	California	4	3	-0.297438	-1.18222	-1.34079	0.951322	-1.27553	-1.79709	0
964.201	California	4	1	-0.297438	-1.18222	-1.34079	0.951322	-1.27553	-1.79709	1
987.201	California	4	2	-0.297438	-1.18222	-1.34079	0.951322	-1.27553	-1.79709	0
947.201	California	4	3	-0.297438	-1.18222	-1.34079	0.951322	-1.27553	-1.79709	1
995.201	California	4	3	-0.297438	-1.18222	-1.34079	0.951322	-1.27553	-2.79709	1
888.201	California	4	3	-0.297438	-1.18222	-1.34079	0.951322	-1.27553	-1.79709	0
946.201	California	4	3	-0.297438	-1.18222	-1.34079	0.951322	-1.27553	-1.79709	1
986.201	California	4	2	-0.297438	-1.18222	-1.34079	0.951322	-1.27553	-1.79709	1
917.201	California	4	3	-0.297438	-1.18222	-1.34079	0.951322	-1.27553	0.202913	1
997.201	California	4	3	-0.297438	-1.18222	-1.34079	0.951322	-1.27553	0.202913	1
889.201	California	4	2	-0.297438	-1.18222	-1.34079	0.951322	-1.27553	0.202913	1
915.201	California	4	3	-0.297438	-1.18222	-1.34079	0.951322	-1.27553	0.202913	1
939.201	California	4	3	-0.297438	-1.18222	-1.34079	0.951322	-1.27553	0.202913	1
952.201	California	4	3	-0.297438	-1.18222	-1.34079	0.951322	-1.27553	0.202913	1
961.201	California	4	1	-0.297438	-1.18222	-1.34079	0.951322	-1.27553	0.202913	0
982.201	California	4	2	-0.297438	-1.18222	-1.34079	0.951322	-1.27553	0.202913	1
991.201	California	4	3	-0.297438	-1.18222	-1.34079	0.951322	-1.27553	0.202913	1
1002.2	California	4		-0.297438	-1.18222	-1.34079	0.951322	-1.27553	0.202913	0
903.201	California	4	2	-0.297438	-1.18222	-1.34079	0.951322	-1.27553	0.202913	0
992.201	California	4	3	-0.297438	-1.18222	-1.34079	0.951322	-1.27553	0.202913	0
990.201	California	4	1	-0.297438	-1.18222	-1.34079	0.951322	-1.27553	1.20291	0
884.201	California	4	2	-0.297438	-1.18222	-1.34079	0.951322	-1.27553	1.20291	0
936.201	California	4	3	-0.297438	-1.18222	-1.34079	0.951322	-1.27553	1.20291	0
920.201	California	4	2	-0.297438	-1.18222	-1.34079	0.951322	-1.27553	1.20291	1
954.201	California	4	3	-0.297438	-1.18222	-1.34079	0.951322	-1.27553	1.20291	0
908.201	California	4	1	-0.297438	-1.18222	-1.34079	0.951322	-1.27553	1.20291	0
927.201	California	4	2	-0.297438	-1.18222	-1.34079	0.951322	-1.27553	1.20291	0
930.201	California	4	3	-0.297438	-1.18222	-1.34079	0.951322	-1.27553	1.20291	1
934.201	California	4	1	-0.297438	-1.18222	-1.34079	0.951322	-1.27553	1.20291	0
890.201	California	4	2	-0.297438	-1.18222	-1.34079	0.951322	-1.27553	1.20291	0
911.201	California	4	1	-0.297438	-1.18222	-1.34079	0.951322	-1.27553	1.20291	1
914.201	California	4	1	-0.297438	-1.18222	-1.34079	0.951322	-1.27553	1.20291	1
918.201	California	4	2	-0.297438	-1.18222	-1.34079	0.951322	-1.27553	1.20291	0
925.201	California	4	2	-0.297438	-1.18222	-1.34079	0.951322	-1.27553	1.20291	1
931.201	California	4	2	-0.297438	-1.18222	-1.34079	0.951322	-1.27553	1.20291	1
953.201	California	4	2	-0.297438	-1.18222	-1.34079	0.951322	-1.27553	1.20291	1
956.201	California	4	1	-0.297438	-1.18222	-1.34079	0.951322	-1.27553	1.20291	1
994.201	California	4	2	-0.297438	-1.18222	-1.34079	0.951322	-1.27553	1.20291	1
880.201	California	4	3	-0.297438	-1.18222	-1.34079	0.951322	-1.27553	2.20291	1
907.201	California	4	2	-0.297438	-1.18222	-1.34079	0.951322	-1.27553	2.20291	0
916.201	California	4	2	-0.297438	-1.18222	-1.34079	0.951322	-1.27553	2.20291	1
984.201	California	4	3	-0.297438	-1.18222	-1.34079	0.951322	-1.27553	2.20291	1
885.201	California	4	1	-0.297438	-1.18222	-1.34079	0.951322	-1.27553	2.20291	0
996.201	California	4	3	-0.297438	-1.18222	-1.34079	0.951322	-1.27553	2.20291	1
902.201	California	4	3	-0.297438	-1.18222	-1.34079	0.951322	-1.27553	2.20291	0
906.201	California	4	2	-0.297438	-1.18222	-1.34079	0.951322	-1.27553	2.20291	0
893.201	California	4	1	-0.297438	-1.18222	-1.34079	0.951322	-1.27553	2.20291	1
48	Colorado	5	2	-1.28503	-0.576384	0.498836	0.887494	0.442714	1.20291	0
217	Colorado	5	2	-1.28503	-0.576384	0.498836	0.887494	0.442714	1.20291	0
228	Colorado	5	3	-1.28503	-0.576384	0.498836	0.887494	0.442714	1.20291	0
349	Colorado	5	3	-1.28503	-0.576384	0.498836	0.887494	0.442714	2.20291	1
357	Colorado	5	3	-1.28503	-0.576384	0.498836	0.887494	0.442714	1.20291	1
361	Colorado	5	3	-1.28503	-0.576384	0.498836	0.887494	0.442714	2.20291	0
362	Colorado	5	2	-1.28503	-0.576384	0.498836	0.887494	0.442714	0.202913	0
547	Colorado	5	1	-1.28503	-0.576384	0.498836	0.887494	0.442714	1.20291	1
550	Colorado	5	3	-1.28503	-0.576384	0.498836	0.887494	0.442714	-1.79709	1
643	Colorado	5	2	-1.28503	-0.576384	0.498836	0.887494	0.442714	0.202913	0
877	Colorado	5	3	-1.28503	-0.576384	0.498836	0.887494	0.442714	-2.79709	1
882	Colorado	5	2	-1.28503	-0.576384	0.498836	0.887494	0.442714	-1.79709	0
883	Colorado	5	2	-1.28503	-0.576384	0.498836	0.887494	0.442714	-1.79709	0
861.201	Colorado	5	2	-1.28503	-0.576384	0.498836	0.887494	0.442714	-1.79709	0
871.201	Colorado	5	2	-1.28503	-0.576384	0.498836	0.887494	0.442714	-1.79709	0
801.201	Colorado	5	3	-1.28503	-0.576384	0.498836	0.887494	0.442714	-1.79709	0
866.201	Colorado	5	3	-1.28503	-0.576384	0.498836	0.887494	0.442714	-1.79709	0
804.201	Colorado	5	1	-1.28503	-0.576384	0.498836	0.887494	0.442714	0.202913	1
873.201	Colorado	5	2	-1.28503	-0.576384	0.498836	0.887494	0.442714	-0.797087	1
795.201	Colorado	5	2	-1.28503	-0.576384	0.498836	0.887494	0.442714	1.20291	1
809.201	Colorado	5	2	-1.28503	-0.576384	0.498836	0.887494	0.442714	1.20291	0
813.201	Colorado	5	2	-1.28503	-0.576384	0.498836	0.887494	0.442714	1.20291	0
864.201	Colorado	5	2	-1.28503	-0.576384	0.498836	0.887494	0.442714	1.20291	0
878.201	Colorado	5	2	-1.28503	-0.576384	0.498836	0.887494	0.442714	1.20291	1
812.201	Colorado	5	2	-1.28503	-0.576384	0.498836	0.887494	0.442714	1.20291	1
838.201	Colorado	5	1	-1.28503	-0.576384	0.498836	0.887494	0.442714	2.20291	1
808.201	Colorado	5	2	-1.28503	-0.576384	0.498836	0.887494	0.442714	2.20291	1
877.201	Colorado	5	2	-1.28503	-0.576384	0.498836	0.887494	0.442714	2.20291	1
800.201	Colorado	5	2	-1.28503	-0.576384	0.498836	0.887494	0.442714	2.20291	1
869.201	Colorado	5	3	-1.28503	-0.576384	0.498836	0.887494	0.442714	2.20291	1
24	Conneticut	6	2	-1.83734	-1.68708	0.292136	2.31948	0.677604	1.20291	1
35	Conneticut	6	2	-1.83734	-1.68708	0.292136	2.31948	0.677604	2.20291	0
773	Conneticut	6	3	-1.83734	-1.68708	0.292136	2.31948	0.677604	-1.79709	0
576.201	Conneticut	6	1	-1.83734	-1.68708	0.292136	2.31948	0.677604		0
628.201	Conneticut	6	3	-1.83734	-1.68708	0.292136	2.31948	0.677604	-1.79709	1
773.201	Conneticut	6	2	-1.83734	-1.68708	0.292136	2.31948	0.677604	-1.79709	0
764.201	Conneticut	6	3	-1.83734	-1.68708	0.292136	2.31948	0.677604	-2.79709	1
490.201	Conneticut	6	2	-1.83734	-1.68708	0.292136	2.31948	0.677604	0.202913	0
700.201	Conneticut	6	3	-1.83734	-1.68708	0.292136	2.31948	0.677604	0.202913	1
729.201	Conneticut	6	2	-1.83734	-1.68708	0.292136	2.31948	0.677604	1.20291	0
520.201	Conneticut	6	3	-1.83734	-1.68708	0.292136	2.31948	0.677604	1.20291	1
635.201	Conneticut	6	2	-1.83734	-1.68708	0.292136	2.31948	0.677604	1.20291	1
400	Delaware	7	3	0.876392	-0.172494	-0.576004	1.48146	-0.853329	0.202913	1
454	Delaware	7	2	0.876392	-0.172494	-0.576004	1.48146	-0.853329	2.20291	1
462	Delaware	7	2	0.876392	-0.172494	-0.576004	1.48146	-0.853329	-3.79709	0
523.201	Delaware	7	3	0.876392	-0.172494	-0.576004	1.48146	-0.853329	0.202913	0
29	Florida	8	3	0.358015	0.130423	-1.96089	-0.127453	0.249921	-1.79709	1
75	Florida	8		0.358015	0.130423	-1.96089	-0.127453	0.249921	1.20291	1
87	Florida	8	2	0.358015	0.130423	-1.96089	-0.127453	0.249921	-1.79709	1
106	Florida	8	3	0.358015	0.130423	-1.96089	-0.127453	0.249921	-1.79709	1
110	Florida	8	2	0.358015	0.130423	-1.96089	-0.127453	0.249921	0.202913	0
113	Florida	8	3	0.358015	0.130423	-1.96089	-0.127453	0.249921	-1.79709	0
133	Florida	8	2	0.358015	0.130423	-1.96089	-0.127453	0.249921	0.202913	0
146	Florida	8	2	0.358015	0.130423	-1.96089	-0.127453	0.249921	1.20291	0
152	Florida	8	2	0.358015	0.130423	-1.96089	-0.127453	0.249921	0.202913	0
157	Florida	8	2	0.358015	0.130423	-1.96089	-0.127453	0.249921	1.20291	1
160	Florida	8	3	0.358015	0.130423	-1.96089	-0.127453	0.249921	2.20291	1
274	Florida	8	3	0.358015	0.130423	-1.96089	-0.127453	0.249921	-1.79709	1
277	Florida	8	2	0.358015	0.130423	-1.96089	-0.127453	0.249921	1.20291	0
280	Florida	8	2	0.358015	0.130423	-1.96089	-0.127453	0.249921	2.20291	1
281	Florida	8	2	0.358015	0.130423	-1.96089	-0.127453	0.249921	0.202913	1
282	Florida	8	3	0.358015	0.130423	-1.96089	-0.127453	0.249921	0.202913	1
283	Florida	8	2	0.358015	0.130423	-1.96089	-0.127453	0.249921	0.202913	1
287	Florida	8	3	0.358015	0.130423	-1.96089	-0.127453	0.249921	1.20291	1
288	Florida	8	3	0.358015	0.130423	-1.96089	-0.127453	0.249921	0.202913	1
367	Florida	8	3	0.358015	0.130423	-1.96089	-0.127453	0.249921	0.202913	1
369	Florida	8	2	0.358015	0.130423	-1.96089	-0.127453	0.249921	-2.79709	0
379	Florida	8	3	0.358015	0.130423	-1.96089	-0.127453	0.249921	1.20291	1
393	Florida	8	2	0.358015	0.130423	-1.96089	-0.127453	0.249921	-2.79709	0
403	Florida	8	2	0.358015	0.130423	-1.96089	-0.127453	0.249921	1.20291	0
565	Florida	8	2	0.358015	0.130423	-1.96089	-0.127453	0.249921	-2.79709	1
567	Florida	8	3	0.358015	0.130423	-1.96089	-0.127453	0.249921	1.20291	1
590	Florida	8	2	0.358015	0.130423	-1.96089	-0.127453	0.249921	1.20291	1
594	Florida	8	3	0.358015	0.130423	-1.96089	-0.127453	0.249921	0.202913	0
601	Florida	8	2	0.358015	0.130423	-1.96089	-0.127453	0.249921	0.202913	0
611	Florida	8	3	0.358015	0.130423	-1.96089	-0.127453	0.249921	0.202913	1
625	Florida	8	3	0.358015	0.130423	-1.96089	-0.127453	0.249921	-2.79709	0
648	Florida	8	2	0.358015	0.130423	-1.96089	-0.127453	0.249921	1.20291	0
733	Florida	8	2	0.358015	0.130423	-1.96089	-0.127453	0.249921	1.20291	1
736	Florida	8	2	0.358015	0.130423	-1.96089	-0.127453	0.249921	1.20291	1
824	Florida	8	3	0.358015	0.130423	-1.96089	-0.127453	0.249921	0.202913	1
825	Florida	8	2	0.358015	0.130423	-1.96089	-0.127453	0.249921	1.20291	1
827	Florida	8	3	0.358015	0.130423	-1.96089	-0.127453	0.249921	-1.79709	1
831	Florida	8	3	0.358015	0.130423	-1.96089	-0.127453	0.249921	0.202913	1
834	Florida	8	3	0.358015	0.130423	-1.96089	-0.127453	0.249921	2.20291	1
840	Florida	8	2	0.358015	0.130423	-1.96089	-0.127453	0.249921	2.20291	1
845	Florida	8	2	0.358015	0.130423	-1.96089	-0.127453	0.249921	1.20291	0
850	Florida	8	3	0.358015	0.130423	-1.96089	-0.127453	0.249921	-1.79709	0
984	Florida	8	2	0.358015	0.130423	-1.96089	-0.127453	0.249921	1.20291	1
985	Florida	8	2	0.358015	0.130423	-1.96089	-0.127453	0.249921	0.202913	0
987	Florida	8	2	0.358015	0.130423	-1.96089	-0.127453	0.249921	-2.79709	0
988	Florida	8	3	0.358015	0.130423	-1.96089	-0.127453	0.249921	1.20291	0
989	Florida	8	1	0.358015	0.130423	-1.96089	-0.127453	0.249921	1.20291	1
990	Florida	8		0.358015	0.130423	-1.96089	-0.127453	0.249921	1.20291	0
991	Florida	8	2	0.358015	0.130423	-1.96089	-0.127453	0.249921	0.202913	0
577.201	Florida	8	2	0.358015	0.130423	-1.96089	-0.127453	0.249921	-1.79709	0
590.201	Florida	8		0.358015	0.130423	-1.96089	-0.127453	0.249921	-2.79709	1
541.201	Florida	8	3	0.358015	0.130423	-1.96089	-0.127453	0.249921	-1.79709	0
688.201	Florida	8	3	0.358015	0.130423	-1.96089	-0.127453	0.249921	-1.79709	1
142.201	Florida	8	2	0.358015	0.130423	-1.96089	-0.127453	0.249921	-1.79709	0
699.201	Florida	8	3	0.358015	0.130423	-1.96089	-0.127453	0.249921	-1.79709	0
303.201	Florida	8	2	0.358015	0.130423	-1.96089	-0.127453	0.249921	-1.79709	0
456.201	Florida	8	3	0.358015	0.130423	-1.96089	-0.127453	0.249921	-1.79709	1
646.201	Florida	8	1	0.358015	0.130423	-1.96089	-0.127453	0.249921	-1.79709	0
779.201	Florida	8	2	0.358015	0.130423	-1.96089	-0.127453	0.249921	-2.79709	1
484.201	Florida	8	2	0.358015	0.130423	-1.96089	-0.127453	0.249921	-1.79709	1
568.201	Florida	8	3	0.358015	0.130423	-1.96089	-0.127453	0.249921	-1.79709	1
620.201	Florida	8	3	0.358015	0.130423	-1.96089	-0.127453	0.249921	-1.79709	1
633.201	Florida	8	2	0.358015	0.130423	-1.96089	-0.127453	0.249921	-1.79709	1
781.201	Florida	8	3	0.358015	0.130423	-1.96089	-0.127453	0.249921	-1.79709	0
685.201	Florida	8	2	0.358015	0.130423	-1.96089	-0.127453	0.249921	0.202913	1
327.201	Florida	8	2	0.358015	0.130423	-1.96089	-0.127453	0.249921	0.202913	1
745.201	Florida	8	3	0.358015	0.130423	-1.96089	-0.127453	0.249921	0.202913	1
282.201	Florida	8	2	0.358015	0.130423	-1.96089	-0.127453	0.249921	0.202913	1
497.201	Florida	8	2	0.358015	0.130423	-1.96089	-0.127453	0.249921	0.202913	1
705.201	Florida	8	2	0.358015	0.130423	-1.96089	-0.127453	0.249921	0.202913	0
717.201	Florida	8		0.358015	0.130423	-1.96089	-0.127453	0.249921	0.202913	0
719.201	Florida	8	1	0.358015	0.130423	-1.96089	-0.127453	0.249921	0.202913	0
572.201	Florida	8	2	0.358015	0.130423	-1.96089	-0.127453	0.249921	0.202913	1
454.201	Florida	8	2	0.358015	0.130423	-1.96089	-0.127453	0.249921	1.20291	1
663.201	Florida	8	2	0.358015	0.130423	-1.96089	-0.127453	0.249921	1.20291	1
681.201	Florida	8	1	0.358015	0.130423	-1.96089	-0.127453	0.249921	1.20291	1
227.201	Florida	8	2	0.358015	0.130423	-1.96089	-0.127453	0.249921	1.20291	0
671.201	Florida	8	2	0.358015	0.130423	-1.96089	-0.127453	0.249921	1.20291	1
754.201	Florida	8	2	0.358015	0.130423	-1.96089	-0.127453	0.249921	1.20291	0
464.201	Florida	8	2	0.358015	0.130423	-1.96089	-0.127453	0.249921	1.20291	0
546.201	Florida	8	2	0.358015	0.130423	-1.96089	-0.127453	0.249921	1.20291	0
587.201	Florida	8	3	0.358015	0.130423	-1.96089	-0.127453	0.249921	1.20291	1
686.201	Florida	8	1	0.358015	0.130423	-1.96089	-0.127453	0.249921	1.20291	0
626.201	Florida	8	3	0.358015	0.130423	-1.96089	-0.127453	0.249921	2.20291	0
19.2006	Florida	8	3	0.358015	0.130423	-1.96089	-0.127453	0.249921	2.20291	0
158.201	Florida	8	2	0.358015	0.130423	-1.96089	-0.127453	0.249921	2.20291	0
447.201	Florida	8	1	0.358015	0.130423	-1.96089	-0.127453	0.249921	2.20291	1
513.201	Florida	8	3	0.358015	0.130423	-1.96089	-0.127453	0.249921	2.20291	0
667.201	Florida	8		0.358015	0.130423	-1.96089	-0.127453	0.249921	2.20291	1
30	Georgia	9	3	-1.56773	1.03917	-0.741364	-0.101892	0.0755392	-1.79709	1
96	Georgia	9		-1.56773	1.03917	-0.741364	-0.101892	0.0755392	1.20291	1
101	Georgia	9	2	-1.56773	1.03917	-0.741364	-0.101892	0.0755392	0.202913	0
139	Georgia	9	2	-1.56773	1.03917	-0.741364	-0.101892	0.0755392	0.202913	1
150	Georgia	9	3	-1.56773	1.03917	-0.741364	-0.101892	0.0755392	0.202913	0
279	Georgia	9	3	-1.56773	1.03917	-0.741364	-0.101892	0.0755392	-1.79709	1
285	Georgia	9	3	-1.56773	1.03917	-0.741364	-0.101892	0.0755392	-2.79709	1
387	Georgia	9	3	-1.56773	1.03917	-0.741364	-0.101892	0.0755392	-1.79709	0
406	Georgia	9	3	-1.56773	1.03917	-0.741364	-0.101892	0.0755392	0.202913	0
420	Georgia	9	1	-1.56773	1.03917	-0.741364	-0.101892	0.0755392	-1.79709	1
453	Georgia	9	2	-1.56773	1.03917	-0.741364	-0.101892	0.0755392	-1.79709	0
584	Georgia	9	2	-1.56773	1.03917	-0.741364	-0.101892	0.0755392	0.202913	1
658	Georgia	9	3	-1.56773	1.03917	-0.741364	-0.101892	0.0755392	-1.79709	0
724	Georgia	9	2	-1.56773	1.03917	-0.741364	-0.101892	0.0755392	2.20291	1
823	Georgia	9	3	-1.56773	1.03917	-0.741364	-0.101892	0.0755392	0.202913	0
833	Georgia	9	3	-1.56773	1.03917	-0.741364	-0.101892	0.0755392	0.202913	1
835	Georgia	9	1	-1.56773	1.03917	-0.741364	-0.101892	0.0755392	-1.79709	0
836	Georgia	9		-1.56773	1.03917	-0.741364	-0.101892	0.0755392	-1.79709	0
975	Georgia	9	2	-1.56773	1.03917	-0.741364	-0.101892	0.0755392	1.20291	0
979	Georgia	9	1	-1.56773	1.03917	-0.741364	-0.101892	0.0755392	0.202913	0
982	Georgia	9	2	-1.56773	1.03917	-0.741364	-0.101892	0.0755392	1.20291	1
994	Georgia	9	3	-1.56773	1.03917	-0.741364	-0.101892	0.0755392	-1.79709	1
605.201	Georgia	9	3	-1.56773	1.03917	-0.741364	-0.101892	0.0755392	-1.79709	0
624.201	Georgia	9	2	-1.56773	1.03917	-0.741364	-0.101892	0.0755392	-1.79709	0
680.201	Georgia	9	3	-1.56773	1.03917	-0.741364	-0.101892	0.0755392	-2.79709	1
10.2006	Georgia	9	1	-1.56773	1.03917	-0.741364	-0.101892	0.0755392	0.202913	0
488.201	Georgia	9		-1.56773	1.03917	-0.741364	-0.101892	0.0755392	0.202913	1
642.201	Georgia	9		-1.56773	1.03917	-0.741364	-0.101892	0.0755392	0.202913	1
684.201	Georgia	9	2	-1.56773	1.03917	-0.741364	-0.101892	0.0755392	1.20291	1
780.201	Georgia	9	3	-1.56773	1.03917	-0.741364	-0.101892	0.0755392	1.20291	1
756.201	Georgia	9	2	-1.56773	1.03917	-0.741364	-0.101892	0.0755392	1.20291	0
783.201	Georgia	9	2	-1.56773	1.03917	-0.741364	-0.101892	0.0755392	2.20291	0
43	Idaho	11	1	-0.137382	0.231395	0.953576	-0.713381	-0.680262	1.20291	0
44	Idaho	11	1	-0.137382	0.231395	0.953576	-0.713381	-0.680262	-1.79709	1
45	Idaho	11	2	-0.137382	0.231395	0.953576	-0.713381	-0.680262	0.202913	0
218	Idaho	11		-0.137382	0.231395	0.953576	-0.713381	-0.680262	1.20291	1
351	Idaho	11	3	-0.137382	0.231395	0.953576	-0.713381	-0.680262	-1.79709	0
353	Idaho	11	3	-0.137382	0.231395	0.953576	-0.713381	-0.680262	-0.797087	1
875.201	Idaho	11	1	-0.137382	0.231395	0.953576	-0.713381	-0.680262	-1.79709	1
942.201	Idaho	11	2	-0.137382	0.231395	0.953576	-0.713381	-0.680262	-1.79709	1
819.201	Idaho	11	1	-0.137382	0.231395	0.953576	-0.713381	-0.680262	1.20291	1
826.201	Idaho	11	2	-0.137382	0.231395	0.953576	-0.713381	-0.680262	1.20291	0
21	Illinois	12	2	-0.0214153	-0.778328	0.519506	0.518723	0.269479	-1.79709	1
22	Illinois	12	2	-0.0214153	-0.778328	0.519506	0.518723	0.269479	-1.79709	1
65	Illinois	12	1	-0.0214153	-0.778328	0.519506	0.518723	0.269479	1.20291	1
78	Illinois	12	2	-0.0214153	-0.778328	0.519506	0.518723	0.269479	2.20291	1
135	Illinois	12	3	-0.0214153	-0.778328	0.519506	0.518723	0.269479	-1.79709	0
295	Illinois	12	2	-0.0214153	-0.778328	0.519506	0.518723	0.269479	2.20291	1
300	Illinois	12	2	-0.0214153	-0.778328	0.519506	0.518723	0.269479	2.20291	1
301	Illinois	12	2	-0.0214153	-0.778328	0.519506	0.518723	0.269479	0.202913	0
429	Illinois	12	3	-0.0214153	-0.778328	0.519506	0.518723	0.269479	0.202913	1
467	Illinois	12	2	-0.0214153	-0.778328	0.519506	0.518723	0.269479	0.202913	1
673	Illinois	12	3	-0.0214153	-0.778328	0.519506	0.518723	0.269479	0.202913	1
679	Illinois	12	2	-0.0214153	-0.778328	0.519506	0.518723	0.269479	0.202913	0
799	Illinois	12	3	-0.0214153	-0.778328	0.519506	0.518723	0.269479	1.20291	0
804	Illinois	12	1	-0.0214153	-0.778328	0.519506	0.518723	0.269479	-1.79709	1
806	Illinois	12	2	-0.0214153	-0.778328	0.519506	0.518723	0.269479	2.20291	1
808	Illinois	12	2	-0.0214153	-0.778328	0.519506	0.518723	0.269479	1.20291	0
943	Illinois	12	3	-0.0214153	-0.778328	0.519506	0.518723	0.269479	-1.79709	0
945	Illinois	12		-0.0214153	-0.778328	0.519506	0.518723	0.269479	1.20291	1
946	Illinois	12	3	-0.0214153	-0.778328	0.519506	0.518723	0.269479	0.202913	1
954	Illinois	12	1	-0.0214153	-0.778328	0.519506	0.518723	0.269479	2.20291	0
355.201	Illinois	12	3	-0.0214153	-0.778328	0.519506	0.518723	0.269479	-2.79709	1
87.2006	Illinois	12	2	-0.0214153	-0.778328	0.519506	0.518723	0.269479	-1.79709	0
48.2006	Illinois	12	3	-0.0214153	-0.778328	0.519506	0.518723	0.269479	-1.79709	0
80.2006	Illinois	12	3	-0.0214153	-0.778328	0.519506	0.518723	0.269479	-1.79709	1
167.201	Illinois	12	2	-0.0214153	-0.778328	0.519506	0.518723	0.269479	-1.79709	0
285.201	Illinois	12	3	-0.0214153	-0.778328	0.519506	0.518723	0.269479	-1.79709	0
212.201	Illinois	12	3	-0.0214153	-0.778328	0.519506	0.518723	0.269479	-1.79709	0
216.201	Illinois	12	1	-0.0214153	-0.778328	0.519506	0.518723	0.269479	-1.79709	1
230.201	Illinois	12	2	-0.0214153	-0.778328	0.519506	0.518723	0.269479	-1.79709	0
245.201	Illinois	12	3	-0.0214153	-0.778328	0.519506	0.518723	0.269479	-1.79709	1
339.201	Illinois	12	2	-0.0214153	-0.778328	0.519506	0.518723	0.269479	-1.79709	1
391.201	Illinois	12	3	-0.0214153	-0.778328	0.519506	0.518723	0.269479	-1.79709	1
46.2006	Illinois	12	2	-0.0214153	-0.778328	0.519506	0.518723	0.269479	-1.79709	1
276.201	Illinois	12	3	-0.0214153	-0.778328	0.519506	0.518723	0.269479	-1.79709	1
111.201	Illinois	12	3	-0.0214153	-0.778328	0.519506	0.518723	0.269479	-1.79709	1
278.201	Illinois	12	3	-0.0214153	-0.778328	0.519506	0.518723	0.269479	-1.79709	1
359.201	Illinois	12	3	-0.0214153	-0.778328	0.519506	0.518723	0.269479	-1.79709	1
372.201	Illinois	12	2	-0.0214153	-0.778328	0.519506	0.518723	0.269479	-1.79709	1
152.201	Illinois	12	2	-0.0214153	-0.778328	0.519506	0.518723	0.269479	0.202913	1
114.201	Illinois	12	3	-0.0214153	-0.778328	0.519506	0.518723	0.269479	0.202913	0
57.2006	Illinois	12	2	-0.0214153	-0.778328	0.519506	0.518723	0.269479	0.202913	0
223.201	Illinois	12	3	-0.0214153	-0.778328	0.519506	0.518723	0.269479	0.202913	1
342.201	Illinois	12	3	-0.0214153	-0.778328	0.519506	0.518723	0.269479	0.202913	0
24.2006	Illinois	12	2	-0.0214153	-0.778328	0.519506	0.518723	0.269479	0.202913	0
184.201	Illinois	12	3	-0.0214153	-0.778328	0.519506	0.518723	0.269479	0.202913	0
270.201	Illinois	12	3	-0.0214153	-0.778328	0.519506	0.518723	0.269479	0.202913	1
144.201	Illinois	12	2	-0.0214153	-0.778328	0.519506	0.518723	0.269479	0.202913	0
380.201	Illinois	12	2	-0.0214153	-0.778328	0.519506	0.518723	0.269479	-0.797087	1
30.2006	Illinois	12	1	-0.0214153	-0.778328	0.519506	0.518723	0.269479	1.20291	1
125.201	Illinois	12	2	-0.0214153	-0.778328	0.519506	0.518723	0.269479	1.20291	0
145.201	Illinois	12	2	-0.0214153	-0.778328	0.519506	0.518723	0.269479	1.20291	0
58.2006	Illinois	12	3	-0.0214153	-0.778328	0.519506	0.518723	0.269479	1.20291	1
293.201	Illinois	12	2	-0.0214153	-0.778328	0.519506	0.518723	0.269479	1.20291	0
325.201	Illinois	12	2	-0.0214153	-0.778328	0.519506	0.518723	0.269479	1.20291	0
25.2006	Illinois	12	2	-0.0214153	-0.778328	0.519506	0.518723	0.269479	1.20291	1
185.201	Illinois	12	1	-0.0214153	-0.778328	0.519506	0.518723	0.269479	1.20291	0
249.201	Illinois	12	2	-0.0214153	-0.778328	0.519506	0.518723	0.269479	1.20291	0
306.201	Illinois	12	2	-0.0214153	-0.778328	0.519506	0.518723	0.269479	1.20291	1
196.201	Illinois	12	2	-0.0214153	-0.778328	0.519506	0.518723	0.269479	1.20291	1
242.201	Illinois	12	3	-0.0214153	-0.778328	0.519506	0.518723	0.269479	1.20291	0
62.2006	Illinois	12	2	-0.0214153	-0.778328	0.519506	0.518723	0.269479	1.20291	1
199.201	Illinois	12		-0.0214153	-0.778328	0.519506	0.518723	0.269479	1.20291	1
143.201	Illinois	12	2	-0.0214153	-0.778328	0.519506	0.518723	0.269479	2.20291	0
263.201	Illinois	12	2	-0.0214153	-0.778328	0.519506	0.518723	0.269479	2.20291	1
322.201	Illinois	12	2	-0.0214153	-0.778328	0.519506	0.518723	0.269479	2.20291	0
148.201	Illinois	12	1	-0.0214153	-0.778328	0.519506	0.518723	0.269479	2.20291	1
42.2006	Illinois	12	3	-0.0214153	-0.778328	0.519506	0.518723	0.269479	2.20291	0
94.2006	Illinois	12	2	-0.0214153	-0.778328	0.519506	0.518723	0.269479	2.20291	0
329.201	Illinois	12	2	-0.0214153	-0.778328	0.519506	0.518723	0.269479	2.20291	0
194.201	Illinois	12	2	-0.0214153	-0.778328	0.519506	0.518723	0.269479	2.20291	1
67	Indiana	13	3	0.531431	0.837229	0.126776	-0.483764	-0.0613296	-1.79709	0
71	Indiana	13	2	0.531431	0.837229	0.126776	-0.483764	-0.0613296	1.20291	1
89	Indiana	13	2	0.531431	0.837229	0.126776	-0.483764	-0.0613296	-2.79709	1
148	Indiana	13	3	0.531431	0.837229	0.126776	-0.483764	-0.0613296	0.202913	1
577	Indiana	13	3	0.531431	0.837229	0.126776	-0.483764	-0.0613296	-1.79709	1
580	Indiana	13	1	0.531431	0.837229	0.126776	-0.483764	-0.0613296	2.20291	1
593	Indiana	13	2	0.531431	0.837229	0.126776	-0.483764	-0.0613296	0.202913	0
656	Indiana	13	2	0.531431	0.837229	0.126776	-0.483764	-0.0613296	-1.79709	0
664	Indiana	13	3	0.531431	0.837229	0.126776	-0.483764	-0.0613296	1.20291	1
665	Indiana	13	3	0.531431	0.837229	0.126776	-0.483764	-0.0613296	0.202913	0
680	Indiana	13	2	0.531431	0.837229	0.126776	-0.483764	-0.0613296	0.202913	1
693	Indiana	13	3	0.531431	0.837229	0.126776	-0.483764	-0.0613296	-1.79709	1
695	Indiana	13	1	0.531431	0.837229	0.126776	-0.483764	-0.0613296	-1.79709	0
701	Indiana	13		0.531431	0.837229	0.126776	-0.483764	-0.0613296	-0.797087	1
800	Indiana	13	2	0.531431	0.837229	0.126776	-0.483764	-0.0613296	1.20291	1
812	Indiana	13	3	0.531431	0.837229	0.126776	-0.483764	-0.0613296	0.202913	1
944	Indiana	13	3	0.531431	0.837229	0.126776	-0.483764	-0.0613296	-1.79709	1
951	Indiana	13	2	0.531431	0.837229	0.126776	-0.483764	-0.0613296	-1.79709	1
952	Indiana	13	2	0.531431	0.837229	0.126776	-0.483764	-0.0613296	-2.79709	0
962	Indiana	13	3	0.531431	0.837229	0.126776	-0.483764	-0.0613296	0.202913	1
966	Indiana	13	2	0.531431	0.837229	0.126776	-0.483764	-0.0613296	-1.79709	0
967	Indiana	13	3	0.531431	0.837229	0.126776	-0.483764	-0.0613296	1.20291	1
416.201	Indiana	13	2	0.531431	0.837229	0.126776	-0.483764	-0.0613296	-1.79709	1
483.201	Indiana	13	3	0.531431	0.837229	0.126776	-0.483764	-0.0613296	-1.79709	0
442.201	Indiana	13	2	0.531431	0.837229	0.126776	-0.483764	-0.0613296	-1.79709	1
559.201	Indiana	13	2	0.531431	0.837229	0.126776	-0.483764	-0.0613296	-1.79709	0
304.201	Indiana	13	2	0.531431	0.837229	0.126776	-0.483764	-0.0613296	0.202913	1
550.201	Indiana	13	2	0.531431	0.837229	0.126776	-0.483764	-0.0613296	0.202913	1
61.2006	Indiana	13	3	0.531431	0.837229	0.126776	-0.483764	-0.0613296	-0.797087	0
131.201	Indiana	13	3	0.531431	0.837229	0.126776	-0.483764	-0.0613296	0.202913	1
423.201	Indiana	13	3	0.531431	0.837229	0.126776	-0.483764	-0.0613296	0.202913	1
531.201	Indiana	13	2	0.531431	0.837229	0.126776	-0.483764	-0.0613296	1.20291	1
165.201	Indiana	13	1	0.531431	0.837229	0.126776	-0.483764	-0.0613296	2.20291	0
170	Iowa	10	2	1.15722	-0.0715221	0.416156	-0.144251	-0.0600307	0.202913	1
183	Iowa	10	2	1.15722	-0.0715221	0.416156	-0.144251	-0.0600307	2.20291	0
502	Iowa	10	2	1.15722	-0.0715221	0.416156	-0.144251	-0.0600307	1.20291	0
715	Iowa	10	2	1.15722	-0.0715221	0.416156	-0.144251	-0.0600307	1.20291	0
248.201	Iowa	10	3	1.15722	-0.0715221	0.416156	-0.144251	-0.0600307	-1.79709	1
166.201	Iowa	10	3	1.15722	-0.0715221	0.416156	-0.144251	-0.0600307	-1.79709	1
214.201	Iowa	10	2	1.15722	-0.0715221	0.416156	-0.144251	-0.0600307	-1.79709	0
49.2006	Iowa	10	2	1.15722	-0.0715221	0.416156	-0.144251	-0.0600307	0.202913	0
288.201	Iowa	10	2	1.15722	-0.0715221	0.416156	-0.144251	-0.0600307	0.202913	1
421.201	Iowa	10	2	1.15722	-0.0715221	0.416156	-0.144251	-0.0600307	-0.797087	0
385.201	Iowa	10	2	1.15722	-0.0715221	0.416156	-0.144251	-0.0600307	0.202913	1
371.201	Iowa	10	2	1.15722	-0.0715221	0.416156	-0.144251	-0.0600307	0.202913	1
259.201	Iowa	10	3	1.15722	-0.0715221	0.416156	-0.144251	-0.0600307	1.20291	0
45.2006	Iowa	10	3	1.15722	-0.0715221	0.416156	-0.144251	-0.0600307	1.20291	0
272.201	Iowa	10	2	1.15722	-0.0715221	0.416156	-0.144251	-0.0600307	2.20291	1
122.201	Iowa	10	2	1.15722	-0.0715221	0.416156	-0.144251	-0.0600307	2.20291	1
115	Kansas	14	3	0.656483	0.43334	0.540176	-0.301203	-0.162703	0.202913	1
176	Kansas	14	2	0.656483	0.43334	0.540176	-0.301203	-0.162703	1.20291	0
201	Kansas	14	1	0.656483	0.43334	0.540176	-0.301203	-0.162703	0.202913	1
438	Kansas	14	2	0.656483	0.43334	0.540176	-0.301203	-0.162703	2.20291	0
510	Kansas	14	3	0.656483	0.43334	0.540176	-0.301203	-0.162703	-1.79709	0
705	Kansas	14	3	0.656483	0.43334	0.540176	-0.301203	-0.162703	0.202913	0
708	Kansas	14	3	0.656483	0.43334	0.540176	-0.301203	-0.162703	2.20291	0
716	Kansas	14	2	0.656483	0.43334	0.540176	-0.301203	-0.162703	-1.79709	0
725	Kansas	14	3	0.656483	0.43334	0.540176	-0.301203	-0.162703	-1.79709	1
210.201	Kansas	14	3	0.656483	0.43334	0.540176	-0.301203	-0.162703	-2.79709	0
375.201	Kansas	14	3	0.656483	0.43334	0.540176	-0.301203	-0.162703	-1.79709	0
344.201	Kansas	14	3	0.656483	0.43334	0.540176	-0.301203	-0.162703	0.202913	1
200.201	Kansas	14	3	0.656483	0.43334	0.540176	-0.301203	-0.162703	-0.797087	1
68.2006	Kansas	14	2	0.656483	0.43334	0.540176	-0.301203	-0.162703	0.202913	0
253.201	Kansas	14	3	0.656483	0.43334	0.540176	-0.301203	-0.162703	0.202913	1
332.201	Kansas	14	3	0.656483	0.43334	0.540176	-0.301203	-0.162703	0.202913	0
120.201	Kansas	14	2	0.656483	0.43334	0.540176	-0.301203	-0.162703	1.20291	1
39.2006	Kansas	14	2	0.656483	0.43334	0.540176	-0.301203	-0.162703	1.20291	1
281.201	Kansas	14	2	0.656483	0.43334	0.540176	-0.301203	-0.162703	1.20291	1
260.201	Kansas	14	3	0.656483	0.43334	0.540176	-0.301203	-0.162703	2.20291	0
79.2006	Kansas	14	3	0.656483	0.43334	0.540176	-0.301203	-0.162703	2.20291	1
6	Kentuky	15	3	-0.073253	1.84695	-0.121264	-1.14918	0.139354	-2.79709	1
12	Kentuky	15	2	-0.073253	1.84695	-0.121264	-1.14918	0.139354	-1.79709	1
121	Kentuky	15	2	-0.073253	1.84695	-0.121264	-1.14918	0.139354	-0.797087	1
194	Kentuky	15	1	-0.073253	1.84695	-0.121264	-1.14918	0.139354	1.20291	1
203	Kentuky	15	3	-0.073253	1.84695	-0.121264	-1.14918	0.139354	-2.79709	0
207	Kentuky	15	3	-0.073253	1.84695	-0.121264	-1.14918	0.139354	0.202913	1
208	Kentuky	15	2	-0.073253	1.84695	-0.121264	-1.14918	0.139354	-0.797087	0
213	Kentuky	15	2	-0.073253	1.84695	-0.121264	-1.14918	0.139354	-0.797087	0
546	Kentuky	15	3	-0.073253	1.84695	-0.121264	-1.14918	0.139354	-1.79709	1
552	Kentuky	15	3	-0.073253	1.84695	-0.121264	-1.14918	0.139354	-1.79709	1
566	Kentuky	15	3	-0.073253	1.84695	-0.121264	-1.14918	0.139354	0.202913	1
627	Kentuky	15	1	-0.073253	1.84695	-0.121264	-1.14918	0.139354	-2.79709	0
426.201	Kentuky	15	2	-0.073253	1.84695	-0.121264	-1.14918	0.139354	-1.79709	0
567.201	Kentuky	15	3	-0.073253	1.84695	-0.121264	-1.14918	0.139354	-1.79709	1
690.201	Kentuky	15	3	-0.073253	1.84695	-0.121264	-1.14918	0.139354	-1.79709	0
474.201	Kentuky	15	2	-0.073253	1.84695	-0.121264	-1.14918	0.139354	-1.79709	1
509.201	Kentuky	15	2	-0.073253	1.84695	-0.121264	-1.14918	0.139354	-1.79709	1
414.201	Kentuky	15	3	-0.073253	1.84695	-0.121264	-1.14918	0.139354	0.202913	1
182.201	Kentuky	15	3	-0.073253	1.84695	-0.121264	-1.14918	0.139354	0.202913	1
668.201	Kentuky	15	3	-0.073253	1.84695	-0.121264	-1.14918	0.139354	0.202913	1
217.201	Kentuky	15	1	-0.073253	1.84695	-0.121264	-1.14918	0.139354	1.20291	0
595.201	Kentuky	15	2	-0.073253	1.84695	-0.121264	-1.14918	0.139354	1.20291	1
459.201	Kentuky	15	2	-0.073253	1.84695	-0.121264	-1.14918	0.139354	1.20291	0
448.201	Kentuky	15	2	-0.073253	1.84695	-0.121264	-1.14918	0.139354	2.20291	1
492.201	Kentuky	15	2	-0.073253	1.84695	-0.121264	-1.14918	0.139354	2.20291	0
88	Louisiana	16	3	-0.119747	0.837229	-1.73352	-0.574566	0.996023	-2.79709	0
232	Louisiana	16	2	-0.119747	0.837229	-1.73352	-0.574566	0.996023	1.20291	0
337	Louisiana	16	2	-0.119747	0.837229	-1.73352	-0.574566	0.996023	2.20291	1
338	Louisiana	16	3	-0.119747	0.837229	-1.73352	-0.574566	0.996023	-2.79709	1
340	Louisiana	16	2	-0.119747	0.837229	-1.73352	-0.574566	0.996023	2.20291	0
343	Louisiana	16	3	-0.119747	0.837229	-1.73352	-0.574566	0.996023	1.20291	0
386	Louisiana	16	3	-0.119747	0.837229	-1.73352	-0.574566	0.996023	0.202913	1
484	Louisiana	16	2	-0.119747	0.837229	-1.73352	-0.574566	0.996023	0.202913	1
492	Louisiana	16	3	-0.119747	0.837229	-1.73352	-0.574566	0.996023	-1.79709	1
754	Louisiana	16	2	-0.119747	0.837229	-1.73352	-0.574566	0.996023	0.202913	0
860	Louisiana	16	2	-0.119747	0.837229	-1.73352	-0.574566	0.996023	2.20291	0
863	Louisiana	16	2	-0.119747	0.837229	-1.73352	-0.574566	0.996023	-1.79709	1
865	Louisiana	16	2	-0.119747	0.837229	-1.73352	-0.574566	0.996023	1.20291	0
867	Louisiana	16	3	-0.119747	0.837229	-1.73352	-0.574566	0.996023	1.20291	1
1000	Louisiana	16	3	-0.119747	0.837229	-1.73352	-0.574566	0.996023	-1.79709	1
404.201	Louisiana	16	3	-0.119747	0.837229	-1.73352	-0.574566	0.996023	-1.79709	1
170.201	Louisiana	16	3	-0.119747	0.837229	-1.73352	-0.574566	0.996023	-3.79709	0
234.201	Louisiana	16	3	-0.119747	0.837229	-1.73352	-0.574566	0.996023	-3.79709	0
69.2006	Louisiana	16	2	-0.119747	0.837229	-1.73352	-0.574566	0.996023	-1.79709	1
160.201	Louisiana	16	3	-0.119747	0.837229	-1.73352	-0.574566	0.996023	-1.79709	0
107.201	Louisiana	16	3	-0.119747	0.837229	-1.73352	-0.574566	0.996023	-3.79709	1
235.201	Louisiana	16		-0.119747	0.837229	-1.73352	-0.574566	0.996023	-2.79709	1
101.201	Louisiana	16	3	-0.119747	0.837229	-1.73352	-0.574566	0.996023	0.202913	0
356.201	Louisiana	16	3	-0.119747	0.837229	-1.73352	-0.574566	0.996023	0.202913	1
84.2006	Louisiana	16	2	-0.119747	0.837229	-1.73352	-0.574566	0.996023	0.202913	1
188.201	Louisiana	16	2	-0.119747	0.837229	-1.73352	-0.574566	0.996023	0.202913	0
222.201	Louisiana	16	3	-0.119747	0.837229	-1.73352	-0.574566	0.996023	0.202913	0
247.201	Louisiana	16	3	-0.119747	0.837229	-1.73352	-0.574566	0.996023	0.202913	1
66.2006	Louisiana	16		-0.119747	0.837229	-1.73352	-0.574566	0.996023	0.202913	1
300.201	Louisiana	16	3	-0.119747	0.837229	-1.73352	-0.574566	0.996023	1.20291	1
232.201	Louisiana	16	2	-0.119747	0.837229	-1.73352	-0.574566	0.996023	1.20291	0
341.201	Louisiana	16	2	-0.119747	0.837229	-1.73352	-0.574566	0.996023	1.20291	1
405.201	Louisiana	16	1	-0.119747	0.837229	-1.73352	-0.574566	0.996023	1.20291	1
89.2006	Louisiana	16	2	-0.119747	0.837229	-1.73352	-0.574566	0.996023	2.20291	1
164.201	Louisiana	16	2	-0.119747	0.837229	-1.73352	-0.574566	0.996023	2.20291	1
386.201	Louisiana	16	2	-0.119747	0.837229	-1.73352	-0.574566	0.996023	2.20291	0
37	Maine	19	2	-0.0371804	-0.374439	1.32564	-0.556175	-0.737286	-1.79709	0
408	Maine	19	2	-0.0371804	-0.374439	1.32564	-0.556175	-0.737286	-1.79709	1
416	Maine	19	1	-0.0371804	-0.374439	1.32564	-0.556175	-0.737286	0.202913	0
776	Maine	19	2	-0.0371804	-0.374439	1.32564	-0.556175	-0.737286	-1.79709	0
600.201	Maine	19	1	-0.0371804	-0.374439	1.32564	-0.556175	-0.737286	-1.79709	1
627.201	Maine	19	1	-0.0371804	-0.374439	1.32564	-0.556175	-0.737286	0.202913	0
542.201	Maine	19	3	-0.0371804	-0.374439	1.32564	-0.556175	-0.737286	1.20291	1
630.201	Maine	19	2	-0.0371804	-0.374439	1.32564	-0.556175	-0.737286	1.20291	0
555.201	Maine	19	3	-0.0371804	-0.374439	1.32564	-0.556175	-0.737286	1.20291	0
607.201	Maine	19	2	-0.0371804	-0.374439	1.32564	-0.556175	-0.737286	1.20291	1
31	Maryland	18	1	-1.09798	-0.980273	-0.534664	1.42162	-0.760086	1.20291	1
74	Maryland	18	2	-1.09798	-0.980273	-0.534664	1.42162	-0.760086	-1.79709	0
81	Maryland	18	2	-1.09798	-0.980273	-0.534664	1.42162	-0.760086	0.202913	1
128	Maryland	18	3	-1.09798	-0.980273	-0.534664	1.42162	-0.760086	0.202913	1
132	Maryland	18	2	-1.09798	-0.980273	-0.534664	1.42162	-0.760086	1.20291	0
141	Maryland	18	2	-1.09798	-0.980273	-0.534664	1.42162	-0.760086	1.20291	1
163	Maryland	18	2	-1.09798	-0.980273	-0.534664	1.42162	-0.760086	-1.79709	0
268	Maryland	18	3	-1.09798	-0.980273	-0.534664	1.42162	-0.760086	-1.79709	0
372	Maryland	18	2	-1.09798	-0.980273	-0.534664	1.42162	-0.760086	0.202913	0
376	Maryland	18	3	-1.09798	-0.980273	-0.534664	1.42162	-0.760086	0.202913	0
444	Maryland	18	2	-1.09798	-0.980273	-0.534664	1.42162	-0.760086	1.20291	1
723	Maryland	18	2	-1.09798	-0.980273	-0.534664	1.42162	-0.760086	-1.79709	0
822	Maryland	18	3	-1.09798	-0.980273	-0.534664	1.42162	-0.760086	1.20291	0
842	Maryland	18	3	-1.09798	-0.980273	-0.534664	1.42162	-0.760086	0.202913	0
848	Maryland	18	2	-1.09798	-0.980273	-0.534664	1.42162	-0.760086	2.20291	1
995	Maryland	18	3	-1.09798	-0.980273	-0.534664	1.42162	-0.760086	0.202913	1
695.201	Maryland	18	2	-1.09798	-0.980273	-0.534664	1.42162	-0.760086	-1.79709	1
759.201	Maryland	18	2	-1.09798	-0.980273	-0.534664	1.42162	-0.760086	0.202913	0
430.201	Maryland	18	3	-1.09798	-0.980273	-0.534664	1.42162	-0.760086	0.202913	0
648.201	Maryland	18	3	-1.09798	-0.980273	-0.534664	1.42162	-0.760086	0.202913	1
614.201	Maryland	18	2	-1.09798	-0.980273	-0.534664	1.42162	-0.760086	1.20291	1
758.201	Maryland	18	3	-1.09798	-0.980273	-0.534664	1.42162	-0.760086	1.20291	1
760.201	Maryland	18	1	-1.09798	-0.980273	-0.534664	1.42162	-0.760086	1.20291	1
710.201	Maryland	18	2	-1.09798	-0.980273	-0.534664	1.42162	-0.760086	1.20291	0
500.201	Maryland	18	2	-1.09798	-0.980273	-0.534664	1.42162	-0.760086	2.20291	1
1	Massachusetts	17	2	-1.79459	-1.38416	-0.617344	1.56686	-0.967294	2.20291	0
19	Massachusetts	17	2	-1.79459	-1.38416	-0.617344	1.56686	-0.967294	0.202913	0
34	Massachusetts	17	2	-1.79459	-1.38416	-0.617344	1.56686	-0.967294	0.202913	1
36	Massachusetts	17	2	-1.79459	-1.38416	-0.617344	1.56686	-0.967294	-1.79709	1
171	Massachusetts	17	2	-1.79459	-1.38416	-0.617344	1.56686	-0.967294	0.202913	1
175	Massachusetts	17	2	-1.79459	-1.38416	-0.617344	1.56686	-0.967294	1.20291	1
177	Massachusetts	17	1	-1.79459	-1.38416	-0.617344	1.56686	-0.967294	-2.79709	0
377	Massachusetts	17	2	-1.79459	-1.38416	-0.617344	1.56686	-0.967294	2.20291	0
381	Massachusetts	17	1	-1.79459	-1.38416	-0.617344	1.56686	-0.967294	0.202913	1
385	Massachusetts	17	2	-1.79459	-1.38416	-0.617344	1.56686	-0.967294	1.20291	0
405	Massachusetts	17	1	-1.79459	-1.38416	-0.617344	1.56686	-0.967294	2.20291	1
415	Massachusetts	17	3	-1.79459	-1.38416	-0.617344	1.56686	-0.967294	0.202913	0
417	Massachusetts	17	3	-1.79459	-1.38416	-0.617344	1.56686	-0.967294	2.20291	1
571	Massachusetts	17	2	-1.79459	-1.38416	-0.617344	1.56686	-0.967294	1.20291	1
572	Massachusetts	17	2	-1.79459	-1.38416	-0.617344	1.56686	-0.967294	1.20291	1
641	Massachusetts	17		-1.79459	-1.38416	-0.617344	1.56686	-0.967294	0.202913	1
650	Massachusetts	17	3	-1.79459	-1.38416	-0.617344	1.56686	-0.967294	-1.79709	1
651	Massachusetts	17	2	-1.79459	-1.38416	-0.617344	1.56686	-0.967294	2.20291	0
767	Massachusetts	17	3	-1.79459	-1.38416	-0.617344	1.56686	-0.967294	-1.79709	1
770	Massachusetts	17	2	-1.79459	-1.38416	-0.617344	1.56686	-0.967294	1.20291	0
771	Massachusetts	17	1	-1.79459	-1.38416	-0.617344	1.56686	-0.967294	-2.79709	0
775	Massachusetts	17	1	-1.79459	-1.38416	-0.617344	1.56686	-0.967294	2.20291	0
779	Massachusetts	17	3	-1.79459	-1.38416	-0.617344	1.56686	-0.967294	-1.79709	1
780	Massachusetts	17	2	-1.79459	-1.38416	-0.617344	1.56686	-0.967294	1.20291	0
781	Massachusetts	17	2	-1.79459	-1.38416	-0.617344	1.56686	-0.967294	1.20291	0
596.201	Massachusetts	17	3	-1.79459	-1.38416	-0.617344	1.56686	-0.967294	-1.79709	1
678.201	Massachusetts	17	2	-1.79459	-1.38416	-0.617344	1.56686	-0.967294	-1.79709	0
737.201	Massachusetts	17	3	-1.79459	-1.38416	-0.617344	1.56686	-0.967294	-2.79709	0
578.201	Massachusetts	17	1	-1.79459	-1.38416	-0.617344	1.56686	-0.967294	-1.79709	1
731.201	Massachusetts	17	2	-1.79459	-1.38416	-0.617344	1.56686	-0.967294	-1.79709	0
585.201	Massachusetts	17	3	-1.79459	-1.38416	-0.617344	1.56686	-0.967294	-1.79709	1
734.201	Massachusetts	17	1	-1.79459	-1.38416	-0.617344	1.56686	-0.967294	0.202913	1
544.201	Massachusetts	17	3	-1.79459	-1.38416	-0.617344	1.56686	-0.967294	0.202913	1
573.201	Massachusetts	17	1	-1.79459	-1.38416	-0.617344	1.56686	-0.967294	0.202913	0
470.201	Massachusetts	17	3	-1.79459	-1.38416	-0.617344	1.56686	-0.967294	0.202913	0
637.201	Massachusetts	17	2	-1.79459	-1.38416	-0.617344	1.56686	-0.967294	0.202913	1
696.201	Massachusetts	17	2	-1.79459	-1.38416	-0.617344	1.56686	-0.967294	0.202913	0
702.201	Massachusetts	17	1	-1.79459	-1.38416	-0.617344	1.56686	-0.967294	0.202913	1
586.201	Massachusetts	17	2	-1.79459	-1.38416	-0.617344	1.56686	-0.967294	1.20291	0
721.201	Massachusetts	17	2	-1.79459	-1.38416	-0.617344	1.56686	-0.967294	1.20291	1
723.201	Massachusetts	17	2	-1.79459	-1.38416	-0.617344	1.56686	-0.967294	1.20291	0
618.201	Massachusetts	17	3	-1.79459	-1.38416	-0.617344	1.56686	-0.967294	1.20291	1
727.201	Massachusetts	17	2	-1.79459	-1.38416	-0.617344	1.56686	-0.967294	1.20291	0
767.201	Massachusetts	17	3	-1.79459	-1.38416	-0.617344	1.56686	-0.967294	1.20291	1
569.201	Massachusetts	17	3	-1.79459	-1.38416	-0.617344	1.56686	-0.967294	1.20291	0
588.201	Massachusetts	17	3	-1.79459	-1.38416	-0.617344	1.56686	-0.967294	1.20291	1
608.201	Massachusetts	17	2	-1.79459	-1.38416	-0.617344	1.56686	-0.967294	1.20291	0
750.201	Massachusetts	17	3	-1.79459	-1.38416	-0.617344	1.56686	-0.967294	1.20291	0
528.201	Massachusetts	17	2	-1.79459	-1.38416	-0.617344	1.56686	-0.967294	2.20291	0
560.201	Massachusetts	17	2	-1.79459	-1.38416	-0.617344	1.56686	-0.967294	2.20291	0
772.201	Massachusetts	17		-1.79459	-1.38416	-0.617344	1.56686	-0.967294	2.20291	1
786.201	Massachusetts	17	2	-1.79459	-1.38416	-0.617344	1.56686	-0.967294	2.20291	1
506.201	Massachusetts	17	2	-1.79459	-1.38416	-0.617344	1.56686	-0.967294	2.20291	0
9	Michigan	20	2	-0.820357	-0.475411	1.22229	-0.316037	-0.386287	1.20291	1
63	Michigan	20	3	-0.820357	-0.475411	1.22229	-0.316037	-0.386287	2.20291	0
66	Michigan	20	3	-0.820357	-0.475411	1.22229	-0.316037	-0.386287	0.202913	1
142	Michigan	20	3	-0.820357	-0.475411	1.22229	-0.316037	-0.386287	2.20291	0
151	Michigan	20	3	-0.820357	-0.475411	1.22229	-0.316037	-0.386287	0.202913	1
296	Michigan	20	2	-0.820357	-0.475411	1.22229	-0.316037	-0.386287	-2.79709	0
441	Michigan	20	3	-0.820357	-0.475411	1.22229	-0.316037	-0.386287	2.20291	1
573	Michigan	20	3	-0.820357	-0.475411	1.22229	-0.316037	-0.386287	2.20291	1
579	Michigan	20	2	-0.820357	-0.475411	1.22229	-0.316037	-0.386287	1.20291	0
585	Michigan	20	2	-0.820357	-0.475411	1.22229	-0.316037	-0.386287	2.20291	0
587	Michigan	20	2	-0.820357	-0.475411	1.22229	-0.316037	-0.386287	1.20291	0
605	Michigan	20	2	-0.820357	-0.475411	1.22229	-0.316037	-0.386287	2.20291	1
647	Michigan	20	2	-0.820357	-0.475411	1.22229	-0.316037	-0.386287	1.20291	1
670	Michigan	20	1	-0.820357	-0.475411	1.22229	-0.316037	-0.386287	-1.79709	1
686	Michigan	20	2	-0.820357	-0.475411	1.22229	-0.316037	-0.386287	1.20291	0
698	Michigan	20	2	-0.820357	-0.475411	1.22229	-0.316037	-0.386287	1.20291	1
710	Michigan	20	2	-0.820357	-0.475411	1.22229	-0.316037	-0.386287	-1.79709	1
797	Michigan	20	1	-0.820357	-0.475411	1.22229	-0.316037	-0.386287	2.20291	0
801	Michigan	20	1	-0.820357	-0.475411	1.22229	-0.316037	-0.386287	2.20291	0
805	Michigan	20	2	-0.820357	-0.475411	1.22229	-0.316037	-0.386287	0.202913	0
819	Michigan	20	3	-0.820357	-0.475411	1.22229	-0.316037	-0.386287	1.20291	1
949	Michigan	20	2	-0.820357	-0.475411	1.22229	-0.316037	-0.386287	0.202913	1
957	Michigan	20	2	-0.820357	-0.475411	1.22229	-0.316037	-0.386287	1.20291	0
959	Michigan	20	2	-0.820357	-0.475411	1.22229	-0.316037	-0.386287	-1.79709	0
965	Michigan	20	3	-0.820357	-0.475411	1.22229	-0.316037	-0.386287	2.20291	1
968	Michigan	20	2	-0.820357	-0.475411	1.22229	-0.316037	-0.386287	1.20291	0
970	Michigan	20	1	-0.820357	-0.475411	1.22229	-0.316037	-0.386287	0.202913	0
494.201	Michigan	20	2	-0.820357	-0.475411	1.22229	-0.316037	-0.386287	-1.79709	0
545.201	Michigan	20	3	-0.820357	-0.475411	1.22229	-0.316037	-0.386287	0.202913	1
558.201	Michigan	20	3	-0.820357	-0.475411	1.22229	-0.316037	-0.386287	0.202913	1
527.201	Michigan	20	2	-0.820357	-0.475411	1.22229	-0.316037	-0.386287	0.202913	0
443.201	Michigan	20	2	-0.820357	-0.475411	1.22229	-0.316037	-0.386287	1.20291	0
460.201	Michigan	20	2	-0.820357	-0.475411	1.22229	-0.316037	-0.386287	2.20291	0
475.201	Michigan	20	2	-0.820357	-0.475411	1.22229	-0.316037	-0.386287	2.20291	1
491.201	Michigan	20	2	-0.820357	-0.475411	1.22229	-0.316037	-0.386287	2.20291	1
25	Minnesota	21	2	-0.404052	-1.08125	1.26363	0.87721	1.10846	-1.79709	0
190	Minnesota	21	1	-0.404052	-1.08125	1.26363	0.87721	1.10846	-1.79709	1
192	Minnesota	21	2	-0.404052	-1.08125	1.26363	0.87721	1.10846	-3.79709	0
198	Minnesota	21	2	-0.404052	-1.08125	1.26363	0.87721	1.10846	0.202913	1
428	Minnesota	21	2	-0.404052	-1.08125	1.26363	0.87721	1.10846	0.202913	1
430	Minnesota	21	2	-0.404052	-1.08125	1.26363	0.87721	1.10846	0.202913	1
435	Minnesota	21	3	-0.404052	-1.08125	1.26363	0.87721	1.10846	-1.79709	0
436	Minnesota	21	3	-0.404052	-1.08125	1.26363	0.87721	1.10846	0.202913	1
442	Minnesota	21	3	-0.404052	-1.08125	1.26363	0.87721	1.10846	0.202913	1
489	Minnesota	21	3	-0.404052	-1.08125	1.26363	0.87721	1.10846	-1.79709	0
496	Minnesota	21	1	-0.404052	-1.08125	1.26363	0.87721	1.10846	-1.79709	0
525	Minnesota	21	2	-0.404052	-1.08125	1.26363	0.87721	1.10846	1.20291	0
717	Minnesota	21	2	-0.404052	-1.08125	1.26363	0.87721	1.10846	1.20291	0
731	Minnesota	21	2	-0.404052	-1.08125	1.26363	0.87721	1.10846	1.20291	0
973	Minnesota	21	2	-0.404052	-1.08125	1.26363	0.87721	1.10846	-1.79709	0
310.201	Minnesota	21	3	-0.404052	-1.08125	1.26363	0.87721	1.10846	-1.79709	1
59.2006	Minnesota	21	2	-0.404052	-1.08125	1.26363	0.87721	1.10846	0.202913	0
265.201	Minnesota	21	3	-0.404052	-1.08125	1.26363	0.87721	1.10846	0.202913	1
335.201	Minnesota	21	2	-0.404052	-1.08125	1.26363	0.87721	1.10846	0.202913	0
21.2006	Minnesota	21	3	-0.404052	-1.08125	1.26363	0.87721	1.10846	0.202913	0
65.2006	Minnesota	21	2	-0.404052	-1.08125	1.26363	0.87721	1.10846	0.202913	1
103.201	Minnesota	21	3	-0.404052	-1.08125	1.26363	0.87721	1.10846	0.202913	0
358.201	Minnesota	21	3	-0.404052	-1.08125	1.26363	0.87721	1.10846	0.202913	0
224.201	Minnesota	21	2	-0.404052	-1.08125	1.26363	0.87721	1.10846	1.20291	1
243.201	Minnesota	21	3	-0.404052	-1.08125	1.26363	0.87721	1.10846	1.20291	1
348.201	Minnesota	21	2	-0.404052	-1.08125	1.26363	0.87721	1.10846	1.20291	0
349.201	Minnesota	21	2	-0.404052	-1.08125	1.26363	0.87721	1.10846	1.20291	0
100.201	Minnesota	21	2	-0.404052	-1.08125	1.26363	0.87721	1.10846	2.20291	1
116	Mississippi	23	2	-0.167042	1.74598	-0.948064	-1.71311	1.62413	2.20291	0
120	Mississippi	23		-0.167042	1.74598	-0.948064	-1.71311	1.62413	-1.79709	0
212	Mississippi	23	3	-0.167042	1.74598	-0.948064	-1.71311	1.62413	1.20291	1
551	Mississippi	23	1	-0.167042	1.74598	-0.948064	-1.71311	1.62413	2.20291	0
554	Mississippi	23	2	-0.167042	1.74598	-0.948064	-1.71311	1.62413	2.20291	1
745	Mississippi	23	2	-0.167042	1.74598	-0.948064	-1.71311	1.62413	-1.79709	1
851	Mississippi	23	2	-0.167042	1.74598	-0.948064	-1.71311	1.62413	2.20291	1
855	Mississippi	23	2	-0.167042	1.74598	-0.948064	-1.71311	1.62413	0.202913	0
856	Mississippi	23	3	-0.167042	1.74598	-0.948064	-1.71311	1.62413	1.20291	0
365.201	Mississippi	23	3	-0.167042	1.74598	-0.948064	-1.71311	1.62413	-1.79709	0
383.201	Mississippi	23	2	-0.167042	1.74598	-0.948064	-1.71311	1.62413	-1.79709	1
411.201	Mississippi	23	3	-0.167042	1.74598	-0.948064	-1.71311	1.62413	-2.79709	0
393.201	Mississippi	23	3	-0.167042	1.74598	-0.948064	-1.71311	1.62413	-1.79709	0
397.201	Mississippi	23	3	-0.167042	1.74598	-0.948064	-1.71311	1.62413	0.202913	1
127.201	Mississippi	23	2	-0.167042	1.74598	-0.948064	-1.71311	1.62413	1.20291	1
174.201	Mississippi	23	2	-0.167042	1.74598	-0.948064	-1.71311	1.62413	1.20291	0
362.201	Mississippi	23	3	-0.167042	1.74598	-0.948064	-1.71311	1.62413	1.20291	0
110.201	Mississippi	23	2	-0.167042	1.74598	-0.948064	-1.71311	1.62413	2.20291	0
4	Missouri	22	2	0.215862	0.837229	0.064766	-0.450188	-0.0291569	2.20291	0
10	Missouri	22	2	0.215862	0.837229	0.064766	-0.450188	-0.0291569	1.20291	0
26	Missouri	22		0.215862	0.837229	0.064766	-0.450188	-0.0291569	-1.79709	0
42	Missouri	22	3	0.215862	0.837229	0.064766	-0.450188	-0.0291569	-1.79709	0
104	Missouri	22	3	0.215862	0.837229	0.064766	-0.450188	-0.0291569	-1.79709	1
107	Missouri	22	2	0.215862	0.837229	0.064766	-0.450188	-0.0291569	0.202913	1
112	Missouri	22	3	0.215862	0.837229	0.064766	-0.450188	-0.0291569	1.20291	1
186	Missouri	22	2	0.215862	0.837229	0.064766	-0.450188	-0.0291569	1.20291	1
197	Missouri	22	2	0.215862	0.837229	0.064766	-0.450188	-0.0291569	0.202913	1
427	Missouri	22	3	0.215862	0.837229	0.064766	-0.450188	-0.0291569	1.20291	0
440	Missouri	22	2	0.215862	0.837229	0.064766	-0.450188	-0.0291569	0.202913	0
514	Missouri	22	3	0.215862	0.837229	0.064766	-0.450188	-0.0291569	0.202913	1
519	Missouri	22	3	0.215862	0.837229	0.064766	-0.450188	-0.0291569	1.20291	0
531	Missouri	22	3	0.215862	0.837229	0.064766	-0.450188	-0.0291569	-1.79709	1
608	Missouri	22	2	0.215862	0.837229	0.064766	-0.450188	-0.0291569	-1.79709	1
709	Missouri	22	1	0.215862	0.837229	0.064766	-0.450188	-0.0291569	1.20291	1
711	Missouri	22	3	0.215862	0.837229	0.064766	-0.450188	-0.0291569	-1.79709	1
720	Missouri	22	2	0.215862	0.837229	0.064766	-0.450188	-0.0291569	-1.79709	0
729	Missouri	22	2	0.215862	0.837229	0.064766	-0.450188	-0.0291569	0.202913	1
971	Missouri	22	2	0.215862	0.837229	0.064766	-0.450188	-0.0291569	0.202913	0
345.201	Missouri	22	2	0.215862	0.837229	0.064766	-0.450188	-0.0291569	-1.79709	0
34.2006	Missouri	22	2	0.215862	0.837229	0.064766	-0.450188	-0.0291569	-1.79709	1
319.201	Missouri	22	1	0.215862	0.837229	0.064766	-0.450188	-0.0291569	-1.79709	1
361.201	Missouri	22	2	0.215862	0.837229	0.064766	-0.450188	-0.0291569	-1.79709	1
154.201	Missouri	22	3	0.215862	0.837229	0.064766	-0.450188	-0.0291569	-1.79709	0
280.201	Missouri	22	2	0.215862	0.837229	0.064766	-0.450188	-0.0291569	-1.79709	1
50.2006	Missouri	22	3	0.215862	0.837229	0.064766	-0.450188	-0.0291569	-1.79709	1
220.201	Missouri	22	3	0.215862	0.837229	0.064766	-0.450188	-0.0291569	-1.79709	1
233.201	Missouri	22	2	0.215862	0.837229	0.064766	-0.450188	-0.0291569	-3.79709	0
370.201	Missouri	22	2	0.215862	0.837229	0.064766	-0.450188	-0.0291569	-3.79709	0
53.2006	Missouri	22	3	0.215862	0.837229	0.064766	-0.450188	-0.0291569	0.202913	1
298.201	Missouri	22	3	0.215862	0.837229	0.064766	-0.450188	-0.0291569	0.202913	1
360.201	Missouri	22	3	0.215862	0.837229	0.064766	-0.450188	-0.0291569	0.202913	0
20.2006	Missouri	22	2	0.215862	0.837229	0.064766	-0.450188	-0.0291569	0.202913	0
121.201	Missouri	22	3	0.215862	0.837229	0.064766	-0.450188	-0.0291569	0.202913	1
197.201	Missouri	22	3	0.215862	0.837229	0.064766	-0.450188	-0.0291569	0.202913	0
368.201	Missouri	22	2	0.215862	0.837229	0.064766	-0.450188	-0.0291569	0.202913	1
38.2006	Missouri	22	3	0.215862	0.837229	0.064766	-0.450188	-0.0291569	1.20291	0
258.201	Missouri	22	2	0.215862	0.837229	0.064766	-0.450188	-0.0291569	1.20291	1
336.201	Missouri	22	2	0.215862	0.837229	0.064766	-0.450188	-0.0291569	1.20291	1
415.201	Missouri	22	2	0.215862	0.837229	0.064766	-0.450188	-0.0291569	2.20291	1
168.201	Missouri	22	2	0.215862	0.837229	0.064766	-0.450188	-0.0291569	2.20291	0
215.201	Missouri	22	2	0.215862	0.837229	0.064766	-0.450188	-0.0291569	2.20291	0
90.2006	Missouri	22	3	0.215862	0.837229	0.064766	-0.450188	-0.0291569	2.20291	0
141.201	Missouri	22	2	0.215862	0.837229	0.064766	-0.450188	-0.0291569	2.20291	0
15	Montana	24	2	0.000228237	-0.0715221	1.53234	-1.04219	-1.59699	1.20291	1
16	Montana	24	2	0.000228237	-0.0715221	1.53234	-1.04219	-1.59699	0.202913	1
47	Montana	24	2	0.000228237	-0.0715221	1.53234	-1.04219	-1.59699	1.20291	0
51	Montana	24		0.000228237	-0.0715221	1.53234	-1.04219	-1.59699	-1.79709	1
834.201	Montana	24	2	0.000228237	-0.0715221	1.53234	-1.04219	-1.59699	-2.79709	1
789.201	Montana	24	2	0.000228237	-0.0715221	1.53234	-1.04219	-1.59699	-1.79709	0
863.201	Montana	24	2	0.000228237	-0.0715221	1.53234	-1.04219	-1.59699	-2.79709	1
836.201	Montana	24	2	0.000228237	-0.0715221	1.53234	-1.04219	-1.59699	0.202913	1
879.201	Montana	24	1	0.000228237	-0.0715221	1.53234	-1.04219	-1.59699	0.202913	0
790.201	Montana	24	3	0.000228237	-0.0715221	1.53234	-1.04219	-1.59699	0.202913	1
860.201	Montana	24	3	0.000228237	-0.0715221	1.53234	-1.04219	-1.59699	0.202913	0
847.201	Montana	24	3	0.000228237	-0.0715221	1.53234	-1.04219	-1.59699	1.20291	1
828.201	Montana	24	2	0.000228237	-0.0715221	1.53234	-1.04219	-1.59699	1.20291	1
827.201	Montana	24	2	0.000228237	-0.0715221	1.53234	-1.04219	-1.59699	1.20291	1
196	Nebraska	27	2	0.0600821	-0.475411	0.333476	0.0558887	0.0186375	1.20291	1
433	Nebraska	27	2	0.0600821	-0.475411	0.333476	0.0558887	0.0186375	1.20291	1
500	Nebraska	27	2	0.0600821	-0.475411	0.333476	0.0558887	0.0186375	0.202913	0
706	Nebraska	27	3	0.0600821	-0.475411	0.333476	0.0558887	0.0186375	0.202913	1
266.201	Nebraska	27	3	0.0600821	-0.475411	0.333476	0.0558887	0.0186375	-1.79709	1
316.201	Nebraska	27	3	0.0600821	-0.475411	0.333476	0.0558887	0.0186375	-1.79709	0
28.2006	Nebraska	27	2	0.0600821	-0.475411	0.333476	0.0558887	0.0186375	-0.797087	0
161.201	Nebraska	27	1	0.0600821	-0.475411	0.333476	0.0558887	0.0186375	0.202913	1
51.2006	Nebraska	27	2	0.0600821	-0.475411	0.333476	0.0558887	0.0186375	1.20291	1
257.201	Nebraska	27	2	0.0600821	-0.475411	0.333476	0.0558887	0.0186375	2.20291	1
49	Nevada	31	2	0.421343	0.130423	0.374816	0.646686	0.242388	-1.79709	1
535	Nevada	31	3	0.421343	0.130423	0.374816	0.646686	0.242388	-1.79709	1
756	Nevada	31	2	0.421343	0.130423	0.374816	0.646686	0.242388	1.20291	1
876	Nevada	31	2	0.421343	0.130423	0.374816	0.646686	0.242388	2.20291	0
884	Nevada	31	3	0.421343	0.130423	0.374816	0.646686	0.242388	1.20291	1
885	Nevada	31	1	0.421343	0.130423	0.374816	0.646686	0.242388	-2.79709	0
888	Nevada	31	2	0.421343	0.130423	0.374816	0.646686	0.242388	1.20291	1
943.201	Nevada	31	2	0.421343	0.130423	0.374816	0.646686	0.242388	0.202913	1
905.201	Nevada	31	2	0.421343	0.130423	0.374816	0.646686	0.242388	1.20291	0
969.201	Nevada	31	1	0.421343	0.130423	0.374816	0.646686	0.242388	1.20291	0
388	New Hampshire	28	2	-0.5438	-1.08125	0.994916	0.912781	0.90814	2.20291	0
390	New Hampshire	28	3	-0.5438	-1.08125	0.994916	0.912781	0.90814	0.202913	1
669.201	New Hampshire	28	1	-0.5438	-1.08125	0.994916	0.912781	0.90814	-1.79709	0
774.201	New Hampshire	28	2	-0.5438	-1.08125	0.994916	0.912781	0.90814	1.20291	1
534.201	New Hampshire	28	2	-0.5438	-1.08125	0.994916	0.912781	0.90814	1.20291	1
481.201	New Hampshire	28	3	-0.5438	-1.08125	0.994916	0.912781	0.90814	1.20291	0
718.201	New Hampshire	28	2	-0.5438	-1.08125	0.994916	0.912781	0.90814	1.20291	0
730.201	New Hampshire	28	2	-0.5438	-1.08125	0.994916	0.912781	0.90814	1.20291	1
768.201	New Hampshire	28	3	-0.5438	-1.08125	0.994916	0.912781	0.90814	1.20291	0
532.201	New Hampshire	28	2	-0.5438	-1.08125	0.994916	0.912781	0.90814	2.20291	0
23	New Jersey	29	3	-2.70816	-1.99	-0.079924	1.99692	-0.159602	1.20291	0
159	New Jersey	29	2	-2.70816	-1.99	-0.079924	1.99692	-0.159602	2.20291	0
165	New Jersey	29	3	-2.70816	-1.99	-0.079924	1.99692	-0.159602	1.20291	0
173	New Jersey	29	2	-2.70816	-1.99	-0.079924	1.99692	-0.159602	1.20291	1
180	New Jersey	29	1	-2.70816	-1.99	-0.079924	1.99692	-0.159602	1.20291	1
185	New Jersey	29	2	-2.70816	-1.99	-0.079924	1.99692	-0.159602	0.202913	1
189	New Jersey	29	1	-2.70816	-1.99	-0.079924	1.99692	-0.159602	1.20291	0
239	New Jersey	29	3	-2.70816	-1.99	-0.079924	1.99692	-0.159602	-0.797087	1
313	New Jersey	29	2	-2.70816	-1.99	-0.079924	1.99692	-0.159602	-0.797087	1
321	New Jersey	29	1	-2.70816	-1.99	-0.079924	1.99692	-0.159602	-1.79709	1
324	New Jersey	29	3	-2.70816	-1.99	-0.079924	1.99692	-0.159602	-1.79709	1
331	New Jersey	29	2	-2.70816	-1.99	-0.079924	1.99692	-0.159602	0.202913	0
685	New Jersey	29	2	-2.70816	-1.99	-0.079924	1.99692	-0.159602	0.202913	1
697	New Jersey	29	2	-2.70816	-1.99	-0.079924	1.99692	-0.159602	-1.79709	0
786	New Jersey	29	1	-2.70816	-1.99	-0.079924	1.99692	-0.159602	1.20291	1
789	New Jersey	29	3	-2.70816	-1.99	-0.079924	1.99692	-0.159602	0.202913	1
925	New Jersey	29	1	-2.70816	-1.99	-0.079924	1.99692	-0.159602	1.20291	1
930	New Jersey	29	2	-2.70816	-1.99	-0.079924	1.99692	-0.159602	1.20291	0
728.201	New Jersey	29		-2.70816	-1.99	-0.079924	1.99692	-0.159602	-1.79709	0
604.201	New Jersey	29	2	-2.70816	-1.99	-0.079924	1.99692	-0.159602	-2.79709	0
641.201	New Jersey	29	2	-2.70816	-1.99	-0.079924	1.99692	-0.159602	-1.79709	1
461.201	New Jersey	29	2	-2.70816	-1.99	-0.079924	1.99692	-0.159602	-1.79709	0
602.201	New Jersey	29	3	-2.70816	-1.99	-0.079924	1.99692	-0.159602	-1.79709	1
698.201	New Jersey	29	2	-2.70816	-1.99	-0.079924	1.99692	-0.159602	-1.79709	1
537.201	New Jersey	29	2	-2.70816	-1.99	-0.079924	1.99692	-0.159602	-1.79709	0
689.201	New Jersey	29	2	-2.70816	-1.99	-0.079924	1.99692	-0.159602	0.202913	0
530.201	New Jersey	29	2	-2.70816	-1.99	-0.079924	1.99692	-0.159602	-0.797087	1
533.201	New Jersey	29	3	-2.70816	-1.99	-0.079924	1.99692	-0.159602	0.202913	1
766.201	New Jersey	29	2	-2.70816	-1.99	-0.079924	1.99692	-0.159602	0.202913	1
526.201	New Jersey	29	3	-2.70816	-1.99	-0.079924	1.99692	-0.159602	-0.797087	1
621.201	New Jersey	29	2	-2.70816	-1.99	-0.079924	1.99692	-0.159602	1.20291	1
746.201	New Jersey	29		-2.70816	-1.99	-0.079924	1.99692	-0.159602	1.20291	0
714.201	New Jersey	29	2	-2.70816	-1.99	-0.079924	1.99692	-0.159602	1.20291	1
778.201	New Jersey	29	2	-2.70816	-1.99	-0.079924	1.99692	-0.159602	1.20291	1
482.201	New Jersey	29	2	-2.70816	-1.99	-0.079924	1.99692	-0.159602	1.20291	1
649.201	New Jersey	29	2	-2.70816	-1.99	-0.079924	1.99692	-0.159602	1.20291	1
563.201	New Jersey	29	2	-2.70816	-1.99	-0.079924	1.99692	-0.159602	2.20291	1
227	New Mexico	30	3	1.54948	0.231395	0.085436	-0.98967	-0.0845534	0.202913	0
359	New Mexico	30		1.54948	0.231395	0.085436	-0.98967	-0.0845534	0.202913	1
414	New Mexico	30	3	1.54948	0.231395	0.085436	-0.98967	-0.0845534	-1.79709	0
537	New Mexico	30	2	1.54948	0.231395	0.085436	-0.98967	-0.0845534	-2.79709	1
633	New Mexico	30	2	1.54948	0.231395	0.085436	-0.98967	-0.0845534	1.20291	0
644	New Mexico	30	2	1.54948	0.231395	0.085436	-0.98967	-0.0845534	0.202913	0
758	New Mexico	30	3	1.54948	0.231395	0.085436	-0.98967	-0.0845534	-1.79709	0
855.201	New Mexico	30	3	1.54948	0.231395	0.085436	-0.98967	-0.0845534	-1.79709	0
862.201	New Mexico	30	2	1.54948	0.231395	0.085436	-0.98967	-0.0845534	-1.79709	0
858.201	New Mexico	30	3	1.54948	0.231395	0.085436	-0.98967	-0.0845534	-0.797087	1
845.201	New Mexico	30	3	1.54948	0.231395	0.085436	-0.98967	-0.0845534	1.20291	1
870.201	New Mexico	30	2	1.54948	0.231395	0.085436	-0.98967	-0.0845534	1.20291	0
872.201	New Mexico	30	1	1.54948	0.231395	0.085436	-0.98967	-0.0845534	1.20291	1
842.201	New Mexico	30	1	1.54948	0.231395	0.085436	-0.98967	-0.0845534	1.20291	0
807.201	New Mexico	30	1	1.54948	0.231395	0.085436	-0.98967	-0.0845534	1.20291	1
874.201	New Mexico	30	2	1.54948	0.231395	0.085436	-0.98967	-0.0845534	1.20291	1
38	New York	32	1	-1.42397	-1.38416	-0.079924	1.01895	-0.0814384	1.20291	0
40	New York	32	2	-1.42397	-1.38416	-0.079924	1.01895	-0.0814384	0.202913	0
82	New York	32	1	-1.42397	-1.38416	-0.079924	1.01895	-0.0814384	-3.79709	1
90	New York	32	3	-1.42397	-1.38416	-0.079924	1.01895	-0.0814384	-2.79709	0
93	New York	32	3	-1.42397	-1.38416	-0.079924	1.01895	-0.0814384	0.202913	1
94	New York	32	3	-1.42397	-1.38416	-0.079924	1.01895	-0.0814384	-1.79709	0
103	New York	32	3	-1.42397	-1.38416	-0.079924	1.01895	-0.0814384	-1.79709	1
164	New York	32	2	-1.42397	-1.38416	-0.079924	1.01895	-0.0814384	1.20291	1
167	New York	32	3	-1.42397	-1.38416	-0.079924	1.01895	-0.0814384	1.20291	1
174	New York	32	3	-1.42397	-1.38416	-0.079924	1.01895	-0.0814384	2.20291	0
181	New York	32	1	-1.42397	-1.38416	-0.079924	1.01895	-0.0814384	2.20291	0
221	New York	32	2	-1.42397	-1.38416	-0.079924	1.01895	-0.0814384	2.20291	0
263	New York	32	3	-1.42397	-1.38416	-0.079924	1.01895	-0.0814384	-2.79709	0
308	New York	32		-1.42397	-1.38416	-0.079924	1.01895	-0.0814384	-1.79709	0
310	New York	32	1	-1.42397	-1.38416	-0.079924	1.01895	-0.0814384	2.20291	0
314	New York	32	3	-1.42397	-1.38416	-0.079924	1.01895	-0.0814384	-1.79709	0
315	New York	32	2	-1.42397	-1.38416	-0.079924	1.01895	-0.0814384	0.202913	0
316	New York	32	2	-1.42397	-1.38416	-0.079924	1.01895	-0.0814384	2.20291	0
317	New York	32	3	-1.42397	-1.38416	-0.079924	1.01895	-0.0814384	1.20291	1
323	New York	32	1	-1.42397	-1.38416	-0.079924	1.01895	-0.0814384	1.20291	0
325	New York	32	2	-1.42397	-1.38416	-0.079924	1.01895	-0.0814384	1.20291	0
326	New York	32	1	-1.42397	-1.38416	-0.079924	1.01895	-0.0814384	-1.79709	1
327	New York	32	3	-1.42397	-1.38416	-0.079924	1.01895	-0.0814384	-1.79709	1
328	New York	32	2	-1.42397	-1.38416	-0.079924	1.01895	-0.0814384	2.20291	0
329	New York	32	2	-1.42397	-1.38416	-0.079924	1.01895	-0.0814384	1.20291	0
333	New York	32	1	-1.42397	-1.38416	-0.079924	1.01895	-0.0814384	-1.79709	1
466	New York	32	2	-1.42397	-1.38416	-0.079924	1.01895	-0.0814384	2.20291	0
469	New York	32	3	-1.42397	-1.38416	-0.079924	1.01895	-0.0814384	1.20291	0
599	New York	32	3	-1.42397	-1.38416	-0.079924	1.01895	-0.0814384	-1.79709	0
617	New York	32	3	-1.42397	-1.38416	-0.079924	1.01895	-0.0814384	0.202913	1
668	New York	32	2	-1.42397	-1.38416	-0.079924	1.01895	-0.0814384	2.20291	1
678	New York	32	2	-1.42397	-1.38416	-0.079924	1.01895	-0.0814384	-1.79709	1
687	New York	32	2	-1.42397	-1.38416	-0.079924	1.01895	-0.0814384	2.20291	0
688	New York	32	3	-1.42397	-1.38416	-0.079924	1.01895	-0.0814384	1.20291	1
689	New York	32	2	-1.42397	-1.38416	-0.079924	1.01895	-0.0814384	2.20291	1
782	New York	32	3	-1.42397	-1.38416	-0.079924	1.01895	-0.0814384	-1.79709	0
784	New York	32	2	-1.42397	-1.38416	-0.079924	1.01895	-0.0814384	1.20291	1
787	New York	32	1	-1.42397	-1.38416	-0.079924	1.01895	-0.0814384	2.20291	0
791	New York	32	3	-1.42397	-1.38416	-0.079924	1.01895	-0.0814384	0.202913	1
792	New York	32	3	-1.42397	-1.38416	-0.079924	1.01895	-0.0814384	0.202913	1
795	New York	32	2	-1.42397	-1.38416	-0.079924	1.01895	-0.0814384	1.20291	1
798	New York	32		-1.42397	-1.38416	-0.079924	1.01895	-0.0814384	-1.79709	1
803	New York	32	2	-1.42397	-1.38416	-0.079924	1.01895	-0.0814384	1.20291	1
923	New York	32	3	-1.42397	-1.38416	-0.079924	1.01895	-0.0814384	0.202913	1
927	New York	32	2	-1.42397	-1.38416	-0.079924	1.01895	-0.0814384	1.20291	0
932	New York	32	2	-1.42397	-1.38416	-0.079924	1.01895	-0.0814384	2.20291	0
938	New York	32	1	-1.42397	-1.38416	-0.079924	1.01895	-0.0814384	2.20291	0
612.201	New York	32	2	-1.42397	-1.38416	-0.079924	1.01895	-0.0814384	-1.79709	1
733.201	New York	32	2	-1.42397	-1.38416	-0.079924	1.01895	-0.0814384	-1.79709	1
434.201	New York	32	2	-1.42397	-1.38416	-0.079924	1.01895	-0.0814384	-2.79709	1
466.201	New York	32	2	-1.42397	-1.38416	-0.079924	1.01895	-0.0814384	-1.79709	1
538.201	New York	32	2	-1.42397	-1.38416	-0.079924	1.01895	-0.0814384	-1.79709	0
622.201	New York	32	3	-1.42397	-1.38416	-0.079924	1.01895	-0.0814384	-1.79709	0
640.201	New York	32	3	-1.42397	-1.38416	-0.079924	1.01895	-0.0814384	-1.79709	1
732.201	New York	32	3	-1.42397	-1.38416	-0.079924	1.01895	-0.0814384	-1.79709	0
751.201	New York	32	3	-1.42397	-1.38416	-0.079924	1.01895	-0.0814384	-1.79709	1
762.201	New York	32	3	-1.42397	-1.38416	-0.079924	1.01895	-0.0814384	-1.79709	1
439.201	New York	32	3	-1.42397	-1.38416	-0.079924	1.01895	-0.0814384	0.202913	0
632.201	New York	32	3	-1.42397	-1.38416	-0.079924	1.01895	-0.0814384	0.202913	1
753.201	New York	32	3	-1.42397	-1.38416	-0.079924	1.01895	-0.0814384	0.202913	1
499.201	New York	32	3	-1.42397	-1.38416	-0.079924	1.01895	-0.0814384	0.202913	1
613.201	New York	32	2	-1.42397	-1.38416	-0.079924	1.01895	-0.0814384	0.202913	1
453.201	New York	32	3	-1.42397	-1.38416	-0.079924	1.01895	-0.0814384	0.202913	0
501.201	New York	32	3	-1.42397	-1.38416	-0.079924	1.01895	-0.0814384	0.202913	1
603.201	New York	32	1	-1.42397	-1.38416	-0.079924	1.01895	-0.0814384	0.202913	1
638.201	New York	32	3	-1.42397	-1.38416	-0.079924	1.01895	-0.0814384	0.202913	0
655.201	New York	32	2	-1.42397	-1.38416	-0.079924	1.01895	-0.0814384	0.202913	0
478.201	New York	32	2	-1.42397	-1.38416	-0.079924	1.01895	-0.0814384	0.202913	0
703.201	New York	32	3	-1.42397	-1.38416	-0.079924	1.01895	-0.0814384	0.202913	0
512.201	New York	32	2	-1.42397	-1.38416	-0.079924	1.01895	-0.0814384	1.20291	1
747.201	New York	32	2	-1.42397	-1.38416	-0.079924	1.01895	-0.0814384	1.20291	1
562.201	New York	32	2	-1.42397	-1.38416	-0.079924	1.01895	-0.0814384	1.20291	1
583.201	New York	32	2	-1.42397	-1.38416	-0.079924	1.01895	-0.0814384	1.20291	0
611.201	New York	32	3	-1.42397	-1.38416	-0.079924	1.01895	-0.0814384	1.20291	1
658.201	New York	32	2	-1.42397	-1.38416	-0.079924	1.01895	-0.0814384	1.20291	0
662.201	New York	32	3	-1.42397	-1.38416	-0.079924	1.01895	-0.0814384	1.20291	1
597.201	New York	32	2	-1.42397	-1.38416	-0.079924	1.01895	-0.0814384	1.20291	0
625.201	New York	32	2	-1.42397	-1.38416	-0.079924	1.01895	-0.0814384	1.20291	1
511.201	New York	32	1	-1.42397	-1.38416	-0.079924	1.01895	-0.0814384	1.20291	0
540.201	New York	32	2	-1.42397	-1.38416	-0.079924	1.01895	-0.0814384	2.20291	1
735.201	New York	32	2	-1.42397	-1.38416	-0.079924	1.01895	-0.0814384	2.20291	1
757.201	New York	32	1	-1.42397	-1.38416	-0.079924	1.01895	-0.0814384	2.20291	0
629.201	New York	32	2	-1.42397	-1.38416	-0.079924	1.01895	-0.0814384	2.20291	1
693.201	New York	32	3	-1.42397	-1.38416	-0.079924	1.01895	-0.0814384	2.20291	0
441.201	New York	32		-1.42397	-1.38416	-0.079924	1.01895	-0.0814384	2.20291	0
28	North Carolina	25	2	0.803713	0.43334	-0.348634	-0.43538	0.151788	1.20291	0
111	North Carolina	25	2	0.803713	0.43334	-0.348634	-0.43538	0.151788	2.20291	1
143	North Carolina	25	2	0.803713	0.43334	-0.348634	-0.43538	0.151788	2.20291	0
166	North Carolina	25	3	0.803713	0.43334	-0.348634	-0.43538	0.151788	-1.79709	1
271	North Carolina	25	3	0.803713	0.43334	-0.348634	-0.43538	0.151788	0.202913	0
275	North Carolina	25	2	0.803713	0.43334	-0.348634	-0.43538	0.151788	0.202913	0
286	North Carolina	25	1	0.803713	0.43334	-0.348634	-0.43538	0.151788	1.20291	1
289	North Carolina	25	2	0.803713	0.43334	-0.348634	-0.43538	0.151788	0.202913	0
397	North Carolina	25	3	0.803713	0.43334	-0.348634	-0.43538	0.151788	0.202913	0
419	North Carolina	25	2	0.803713	0.43334	-0.348634	-0.43538	0.151788	1.20291	0
422	North Carolina	25	3	0.803713	0.43334	-0.348634	-0.43538	0.151788	2.20291	0
461	North Carolina	25	2	0.803713	0.43334	-0.348634	-0.43538	0.151788	1.20291	1
465	North Carolina	25	3	0.803713	0.43334	-0.348634	-0.43538	0.151788	0.202913	0
583	North Carolina	25	2	0.803713	0.43334	-0.348634	-0.43538	0.151788	2.20291	1
592	North Carolina	25	2	0.803713	0.43334	-0.348634	-0.43538	0.151788	0.202913	1
603	North Carolina	25	2	0.803713	0.43334	-0.348634	-0.43538	0.151788	2.20291	1
604	North Carolina	25	3	0.803713	0.43334	-0.348634	-0.43538	0.151788	2.20291	0
616	North Carolina	25	3	0.803713	0.43334	-0.348634	-0.43538	0.151788	-2.79709	1
629	North Carolina	25	2	0.803713	0.43334	-0.348634	-0.43538	0.151788	2.20291	1
649	North Carolina	25	2	0.803713	0.43334	-0.348634	-0.43538	0.151788	2.20291	1
712	North Carolina	25	2	0.803713	0.43334	-0.348634	-0.43538	0.151788	-1.79709	0
713	North Carolina	25	3	0.803713	0.43334	-0.348634	-0.43538	0.151788	-3.79709	1
722	North Carolina	25	2	0.803713	0.43334	-0.348634	-0.43538	0.151788	-0.797087	0
727	North Carolina	25	3	0.803713	0.43334	-0.348634	-0.43538	0.151788	-1.79709	0
735	North Carolina	25	3	0.803713	0.43334	-0.348634	-0.43538	0.151788	-1.79709	1
738	North Carolina	25	3	0.803713	0.43334	-0.348634	-0.43538	0.151788	-1.79709	1
742	North Carolina	25	2	0.803713	0.43334	-0.348634	-0.43538	0.151788		0
830	North Carolina	25	2	0.803713	0.43334	-0.348634	-0.43538	0.151788	0.202913	1
832	North Carolina	25	2	0.803713	0.43334	-0.348634	-0.43538	0.151788	0.202913	0
841	North Carolina	25	2	0.803713	0.43334	-0.348634	-0.43538	0.151788	2.20291	1
844	North Carolina	25	3	0.803713	0.43334	-0.348634	-0.43538	0.151788	0.202913	0
977	North Carolina	25	2	0.803713	0.43334	-0.348634	-0.43538	0.151788	-1.79709	0
980	North Carolina	25	2	0.803713	0.43334	-0.348634	-0.43538	0.151788	-1.79709	1
983	North Carolina	25	1	0.803713	0.43334	-0.348634	-0.43538	0.151788	0.202913	1
992	North Carolina	25	2	0.803713	0.43334	-0.348634	-0.43538	0.151788	2.20291	0
552.201	North Carolina	25	3	0.803713	0.43334	-0.348634	-0.43538	0.151788	-1.79709	1
713.201	North Carolina	25	3	0.803713	0.43334	-0.348634	-0.43538	0.151788	-2.79709	0
752.201	North Carolina	25	2	0.803713	0.43334	-0.348634	-0.43538	0.151788	-1.79709	1
536.201	North Carolina	25		0.803713	0.43334	-0.348634	-0.43538	0.151788	-3.79709	1
694.201	North Carolina	25		0.803713	0.43334	-0.348634	-0.43538	0.151788	-1.79709	0
650.201	North Carolina	25	2	0.803713	0.43334	-0.348634	-0.43538	0.151788	0.202913	1
435.201	North Carolina	25	2	0.803713	0.43334	-0.348634	-0.43538	0.151788	0.202913	0
514.201	North Carolina	25	1	0.803713	0.43334	-0.348634	-0.43538	0.151788	1.20291	1
518.201	North Carolina	25	2	0.803713	0.43334	-0.348634	-0.43538	0.151788	1.20291	1
493	North Dakota	26	2	0.45314	-0.576384	1.86306	-0.541557	-1.00895	1.20291	1
538	North Dakota	26	3	0.45314	-0.576384	1.86306	-0.541557	-1.00895	-1.79709	1
718	North Dakota	26	2	0.45314	-0.576384	1.86306	-0.541557	-1.00895	0.202913	0
721	North Dakota	26	2	0.45314	-0.576384	1.86306	-0.541557	-1.00895	0.202913	1
730	North Dakota	26	3	0.45314	-0.576384	1.86306	-0.541557	-1.00895	0.202913	1
976	North Dakota	26		0.45314	-0.576384	1.86306	-0.541557	-1.00895	0.202913	1
824.201	North Dakota	26	1	0.45314	-0.576384	1.86306	-0.541557	-1.00895	-1.79709	0
150.201	North Dakota	26	2	0.45314	-0.576384	1.86306	-0.541557	-1.00895	-2.79709	1
108.201	North Dakota	26	3	0.45314	-0.576384	1.86306	-0.541557	-1.00895	0.202913	1
191.201	North Dakota	26	3	0.45314	-0.576384	1.86306	-0.541557	-1.00895	0.202913	1
337.201	North Dakota	26	3	0.45314	-0.576384	1.86306	-0.541557	-1.00895	1.20291	0
32.2006	North Dakota	26	2	0.45314	-0.576384	1.86306	-0.541557	-1.00895	2.20291	1
3	Ohio	33	2	-0.46925	0.332367	0.181896	-0.327	-0.0594799	2.20291	0
68	Ohio	33	2	-0.46925	0.332367	0.181896	-0.327	-0.0594799	1.20291	0
69	Ohio	33	3	-0.46925	0.332367	0.181896	-0.327	-0.0594799	0.202913	1
70	Ohio	33	2	-0.46925	0.332367	0.181896	-0.327	-0.0594799	1.20291	1
77	Ohio	33	3	-0.46925	0.332367	0.181896	-0.327	-0.0594799	1.20291	1
129	Ohio	33	3	-0.46925	0.332367	0.181896	-0.327	-0.0594799	1.20291	0
130	Ohio	33	2	-0.46925	0.332367	0.181896	-0.327	-0.0594799	0.202913	1
136	Ohio	33	2	-0.46925	0.332367	0.181896	-0.327	-0.0594799	-1.79709	0
140	Ohio	33	2	-0.46925	0.332367	0.181896	-0.327	-0.0594799	-1.79709	1
144	Ohio	33	1	-0.46925	0.332367	0.181896	-0.327	-0.0594799	1.20291	0
145	Ohio	33	3	-0.46925	0.332367	0.181896	-0.327	-0.0594799	-1.79709	0
154	Ohio	33	2	-0.46925	0.332367	0.181896	-0.327	-0.0594799	1.20291	0
156	Ohio	33	2	-0.46925	0.332367	0.181896	-0.327	-0.0594799	-1.79709	1
206	Ohio	33	3	-0.46925	0.332367	0.181896	-0.327	-0.0594799	-1.79709	1
209	Ohio	33	3	-0.46925	0.332367	0.181896	-0.327	-0.0594799	-1.79709	1
290	Ohio	33	1	-0.46925	0.332367	0.181896	-0.327	-0.0594799	0.202913	0
297	Ohio	33	3	-0.46925	0.332367	0.181896	-0.327	-0.0594799	1.20291	1
298	Ohio	33	2	-0.46925	0.332367	0.181896	-0.327	-0.0594799	-1.79709	1
303	Ohio	33	2	-0.46925	0.332367	0.181896	-0.327	-0.0594799	2.20291	0
305	Ohio	33	2	-0.46925	0.332367	0.181896	-0.327	-0.0594799	-1.79709	0
425	Ohio	33	2	-0.46925	0.332367	0.181896	-0.327	-0.0594799	-1.79709	0
426	Ohio	33	2	-0.46925	0.332367	0.181896	-0.327	-0.0594799	2.20291	1
437	Ohio	33	2	-0.46925	0.332367	0.181896	-0.327	-0.0594799	0.202913	1
443	Ohio	33	3	-0.46925	0.332367	0.181896	-0.327	-0.0594799	1.20291	0
446	Ohio	33	1	-0.46925	0.332367	0.181896	-0.327	-0.0594799	-1.79709	0
451	Ohio	33	1	-0.46925	0.332367	0.181896	-0.327	-0.0594799	2.20291	0
456	Ohio	33	2	-0.46925	0.332367	0.181896	-0.327	-0.0594799	-2.79709	0
459	Ohio	33	2	-0.46925	0.332367	0.181896	-0.327	-0.0594799	1.20291	0
622	Ohio	33	3	-0.46925	0.332367	0.181896	-0.327	-0.0594799	1.20291	0
675	Ohio	33	2	-0.46925	0.332367	0.181896	-0.327	-0.0594799	-1.79709	1
681	Ohio	33	2	-0.46925	0.332367	0.181896	-0.327	-0.0594799	-1.79709	0
682	Ohio	33	2	-0.46925	0.332367	0.181896	-0.327	-0.0594799	0.202913	1
684	Ohio	33	2	-0.46925	0.332367	0.181896	-0.327	-0.0594799	-0.797087	0
691	Ohio	33	3	-0.46925	0.332367	0.181896	-0.327	-0.0594799	-1.79709	0
692	Ohio	33	3	-0.46925	0.332367	0.181896	-0.327	-0.0594799	0.202913	1
694	Ohio	33	3	-0.46925	0.332367	0.181896	-0.327	-0.0594799	-2.79709	0
696	Ohio	33		-0.46925	0.332367	0.181896	-0.327	-0.0594799	-1.79709	0
802	Ohio	33	2	-0.46925	0.332367	0.181896	-0.327	-0.0594799	0.202913	1
810	Ohio	33	3	-0.46925	0.332367	0.181896	-0.327	-0.0594799		1
811	Ohio	33	3	-0.46925	0.332367	0.181896	-0.327	-0.0594799	-1.79709	1
815	Ohio	33	2	-0.46925	0.332367	0.181896	-0.327	-0.0594799	1.20291	0
816	Ohio	33	2	-0.46925	0.332367	0.181896	-0.327	-0.0594799	1.20291	1
941	Ohio	33	3	-0.46925	0.332367	0.181896	-0.327	-0.0594799	-1.79709	1
942	Ohio	33	2	-0.46925	0.332367	0.181896	-0.327	-0.0594799	1.20291	1
947	Ohio	33	2	-0.46925	0.332367	0.181896	-0.327	-0.0594799	-1.79709	0
955	Ohio	33	3	-0.46925	0.332367	0.181896	-0.327	-0.0594799	-1.79709	0
960	Ohio	33	2	-0.46925	0.332367	0.181896	-0.327	-0.0594799	0.202913	1
961	Ohio	33	3	-0.46925	0.332367	0.181896	-0.327	-0.0594799	1.20291	1
963	Ohio	33	3	-0.46925	0.332367	0.181896	-0.327	-0.0594799	1.20291	0
446.201	Ohio	33	2	-0.46925	0.332367	0.181896	-0.327	-0.0594799	-1.79709	1
449.201	Ohio	33	2	-0.46925	0.332367	0.181896	-0.327	-0.0594799	-1.79709	1
486.201	Ohio	33	3	-0.46925	0.332367	0.181896	-0.327	-0.0594799	-1.79709	1
504.201	Ohio	33	3	-0.46925	0.332367	0.181896	-0.327	-0.0594799	-1.79709	1
479.201	Ohio	33	3	-0.46925	0.332367	0.181896	-0.327	-0.0594799	-1.79709	0
535.201	Ohio	33	2	-0.46925	0.332367	0.181896	-0.327	-0.0594799	-2.79709	1
554.201	Ohio	33	3	-0.46925	0.332367	0.181896	-0.327	-0.0594799	0.202913	0
469.201	Ohio	33	3	-0.46925	0.332367	0.181896	-0.327	-0.0594799	-0.797087	0
517.201	Ohio	33	3	-0.46925	0.332367	0.181896	-0.327	-0.0594799	0.202913	1
468.201	Ohio	33	3	-0.46925	0.332367	0.181896	-0.327	-0.0594799	1.20291	0
507.201	Ohio	33	3	-0.46925	0.332367	0.181896	-0.327	-0.0594799	1.20291	1
452.201	Ohio	33		-0.46925	0.332367	0.181896	-0.327	-0.0594799	2.20291	0
503.201	Ohio	33	2	-0.46925	0.332367	0.181896	-0.327	-0.0594799	2.20291	1
109	Oklahoma	34	2	2.61883	1.64501	-0.162604	-0.924686	0.150358	-2.79709	1
125	Oklahoma	34	2	2.61883	1.64501	-0.162604	-0.924686	0.150358	2.20291	0
126	Oklahoma	34	3	2.61883	1.64501	-0.162604	-0.924686	0.150358	-0.797087	1
226	Oklahoma	34	2	2.61883	1.64501	-0.162604	-0.924686	0.150358	1.20291	0
234	Oklahoma	34	2	2.61883	1.64501	-0.162604	-0.924686	0.150358	-1.79709	1
382	Oklahoma	34	2	2.61883	1.64501	-0.162604	-0.924686	0.150358	0.202913	1
392	Oklahoma	34	3	2.61883	1.64501	-0.162604	-0.924686	0.150358	0.202913	1
501	Oklahoma	34	2	2.61883	1.64501	-0.162604	-0.924686	0.150358	1.20291	1
750	Oklahoma	34	2	2.61883	1.64501	-0.162604	-0.924686	0.150358	2.20291	0
870	Oklahoma	34	3	2.61883	1.64501	-0.162604	-0.924686	0.150358	1.20291	1
204.201	Oklahoma	34	3	2.61883	1.64501	-0.162604	-0.924686	0.150358	-1.79709	0
123.201	Oklahoma	34	2	2.61883	1.64501	-0.162604	-0.924686	0.150358	-1.79709	0
277.201	Oklahoma	34	3	2.61883	1.64501	-0.162604	-0.924686	0.150358	-1.79709	1
116.201	Oklahoma	34	3	2.61883	1.64501	-0.162604	-0.924686	0.150358	-1.79709	1
367.201	Oklahoma	34	3	2.61883	1.64501	-0.162604	-0.924686	0.150358	-1.79709	1
98.2006	Oklahoma	34	3	2.61883	1.64501	-0.162604	-0.924686	0.150358	0.202913	0
251.201	Oklahoma	34	3	2.61883	1.64501	-0.162604	-0.924686	0.150358	0.202913	0
40.2006	Oklahoma	34	2	2.61883	1.64501	-0.162604	-0.924686	0.150358	0.202913	1
78.2006	Oklahoma	34	3	2.61883	1.64501	-0.162604	-0.924686	0.150358	0.202913	1
395.201	Oklahoma	34	3	2.61883	1.64501	-0.162604	-0.924686	0.150358	0.202913	1
410.201	Oklahoma	34	3	2.61883	1.64501	-0.162604	-0.924686	0.150358	1.20291	1
56.2006	Oklahoma	34	2	2.61883	1.64501	-0.162604	-0.924686	0.150358	1.20291	1
140.201	Oklahoma	34	2	2.61883	1.64501	-0.162604	-0.924686	0.150358	1.20291	0
240.201	Oklahoma	34	3	2.61883	1.64501	-0.162604	-0.924686	0.150358	1.20291	0
420.201	Oklahoma	34	3	2.61883	1.64501	-0.162604	-0.924686	0.150358	1.20291	0
427.201	Oklahoma	34	2	2.61883	1.64501	-0.162604	-0.924686	0.150358	1.20291	1
17	Oregon	35	3	1.35522	-0.273467	-0.700024	-0.143048	0.100137	-1.79709	0
18	Oregon	35	3	1.35522	-0.273467	-0.700024	-0.143048	0.100137	-1.79709	1
52	Oregon	35	3	1.35522	-0.273467	-0.700024	-0.143048	0.100137	0.202913	0
240	Oregon	35	3	1.35522	-0.273467	-0.700024	-0.143048	0.100137	2.20291	1
253	Oregon	35	2	1.35522	-0.273467	-0.700024	-0.143048	0.100137	-1.79709	1
368	Oregon	35	2	1.35522	-0.273467	-0.700024	-0.143048	0.100137	2.20291	1
457	Oregon	35	3	1.35522	-0.273467	-0.700024	-0.143048	0.100137	-1.79709	0
473	Oregon	35	2	1.35522	-0.273467	-0.700024	-0.143048	0.100137	1.20291	1
570	Oregon	35	2	1.35522	-0.273467	-0.700024	-0.143048	0.100137	1.20291	0
598	Oregon	35		1.35522	-0.273467	-0.700024	-0.143048	0.100137	2.20291	0
600	Oregon	35	2	1.35522	-0.273467	-0.700024	-0.143048	0.100137	1.20291	1
618	Oregon	35	3	1.35522	-0.273467	-0.700024	-0.143048	0.100137	0.202913	1
636	Oregon	35	2	1.35522	-0.273467	-0.700024	-0.143048	0.100137	1.20291	1
640	Oregon	35		1.35522	-0.273467	-0.700024	-0.143048	0.100137	-1.79709	0
762	Oregon	35	2	1.35522	-0.273467	-0.700024	-0.143048	0.100137	0.202913	0
963.201	Oregon	35	3	1.35522	-0.273467	-0.700024	-0.143048	0.100137	-1.79709	0
985.201	Oregon	35	3	1.35522	-0.273467	-0.700024	-0.143048	0.100137	-1.79709	1
938.201	Oregon	35		1.35522	-0.273467	-0.700024	-0.143048	0.100137	-1.79709	0
940.201	Oregon	35	1	1.35522	-0.273467	-0.700024	-0.143048	0.100137	-1.79709	1
974.201	Oregon	35	2	1.35522	-0.273467	-0.700024	-0.143048	0.100137	-1.79709	1
881.201	Oregon	35	3	1.35522	-0.273467	-0.700024	-0.143048	0.100137	0.202913	1
962.201	Oregon	35	2	1.35522	-0.273467	-0.700024	-0.143048	0.100137	0.202913	0
993.201	Oregon	35	1	1.35522	-0.273467	-0.700024	-0.143048	0.100137	1.20291	0
886.201	Oregon	35	2	1.35522	-0.273467	-0.700024	-0.143048	0.100137	1.20291	0
1000.2	Oregon	35	3	1.35522	-0.273467	-0.700024	-0.143048	0.100137	1.20291	1
966.201	Oregon	35	1	1.35522	-0.273467	-0.700024	-0.143048	0.100137	1.20291	1
968.201	Oregon	35	2	1.35522	-0.273467	-0.700024	-0.143048	0.100137	1.20291	0
988.201	Oregon	35	2	1.35522	-0.273467	-0.700024	-0.143048	0.100137	2.20291	1
981.201	Oregon	35	3	1.35522	-0.273467	-0.700024	-0.143048	0.100137	2.20291	0
2	Pennsylvania	36	2	-1.38095	-0.778328	-0.513994	-0.0286032	0.0147019	1.20291	0
39	Pennsylvania	36	2	-1.38095	-0.778328	-0.513994	-0.0286032	0.0147019	1.20291	0
41	Pennsylvania	36	2	-1.38095	-0.778328	-0.513994	-0.0286032	0.0147019	1.20291	1
85	Pennsylvania	36	2	-1.38095	-0.778328	-0.513994	-0.0286032	0.0147019	2.20291	1
95	Pennsylvania	36	3	-1.38095	-0.778328	-0.513994	-0.0286032	0.0147019	-1.79709	1
100	Pennsylvania	36	2	-1.38095	-0.778328	-0.513994	-0.0286032	0.0147019	2.20291	1
102	Pennsylvania	36	2	-1.38095	-0.778328	-0.513994	-0.0286032	0.0147019	-1.79709	0
161	Pennsylvania	36	3	-1.38095	-0.778328	-0.513994	-0.0286032	0.0147019	0.202913	1
168	Pennsylvania	36	3	-1.38095	-0.778328	-0.513994	-0.0286032	0.0147019	-1.79709	1
182	Pennsylvania	36	2	-1.38095	-0.778328	-0.513994	-0.0286032	0.0147019	2.20291	0
187	Pennsylvania	36	3	-1.38095	-0.778328	-0.513994	-0.0286032	0.0147019	2.20291	0
204	Pennsylvania	36	2	-1.38095	-0.778328	-0.513994	-0.0286032	0.0147019	-1.79709	0
235	Pennsylvania	36	2	-1.38095	-0.778328	-0.513994	-0.0286032	0.0147019	-1.79709	0
306	Pennsylvania	36	2	-1.38095	-0.778328	-0.513994	-0.0286032	0.0147019	2.20291	0
309	Pennsylvania	36	2	-1.38095	-0.778328	-0.513994	-0.0286032	0.0147019	-1.79709	1
311	Pennsylvania	36	2	-1.38095	-0.778328	-0.513994	-0.0286032	0.0147019	-1.79709	0
312	Pennsylvania	36	2	-1.38095	-0.778328	-0.513994	-0.0286032	0.0147019	-1.79709	1
318	Pennsylvania	36	2	-1.38095	-0.778328	-0.513994	-0.0286032	0.0147019	2.20291	0
319	Pennsylvania	36	2	-1.38095	-0.778328	-0.513994	-0.0286032	0.0147019	0.202913	0
320	Pennsylvania	36	1	-1.38095	-0.778328	-0.513994	-0.0286032	0.0147019	-1.79709	1
322	Pennsylvania	36	3	-1.38095	-0.778328	-0.513994	-0.0286032	0.0147019	1.20291	0
332	Pennsylvania	36	2	-1.38095	-0.778328	-0.513994	-0.0286032	0.0147019	-2.79709	1
463	Pennsylvania	36	2	-1.38095	-0.778328	-0.513994	-0.0286032	0.0147019	-3.79709	1
597	Pennsylvania	36	2	-1.38095	-0.778328	-0.513994	-0.0286032	0.0147019	-2.79709	0
607	Pennsylvania	36	2	-1.38095	-0.778328	-0.513994	-0.0286032	0.0147019	2.20291	1
645	Pennsylvania	36	3	-1.38095	-0.778328	-0.513994	-0.0286032	0.0147019	-1.79709	0
646	Pennsylvania	36	1	-1.38095	-0.778328	-0.513994	-0.0286032	0.0147019	-1.79709	0
663	Pennsylvania	36	2	-1.38095	-0.778328	-0.513994	-0.0286032	0.0147019	-1.79709	1
666	Pennsylvania	36	3	-1.38095	-0.778328	-0.513994	-0.0286032	0.0147019	-1.79709	1
667	Pennsylvania	36	2	-1.38095	-0.778328	-0.513994	-0.0286032	0.0147019	1.20291	0
669	Pennsylvania	36	1	-1.38095	-0.778328	-0.513994	-0.0286032	0.0147019	-2.79709	1
674	Pennsylvania	36	3	-1.38095	-0.778328	-0.513994	-0.0286032	0.0147019	-1.79709	1
676	Pennsylvania	36	3	-1.38095	-0.778328	-0.513994	-0.0286032	0.0147019	2.20291	1
677	Pennsylvania	36	2	-1.38095	-0.778328	-0.513994	-0.0286032	0.0147019	-1.79709	0
683	Pennsylvania	36	2	-1.38095	-0.778328	-0.513994	-0.0286032	0.0147019	0.202913	1
699	Pennsylvania	36	1	-1.38095	-0.778328	-0.513994	-0.0286032	0.0147019	2.20291	0
703	Pennsylvania	36	3	-1.38095	-0.778328	-0.513994	-0.0286032	0.0147019	-0.797087	0
785	Pennsylvania	36	2	-1.38095	-0.778328	-0.513994	-0.0286032	0.0147019	1.20291	0
788	Pennsylvania	36	3	-1.38095	-0.778328	-0.513994	-0.0286032	0.0147019	-1.79709	1
790	Pennsylvania	36	1	-1.38095	-0.778328	-0.513994	-0.0286032	0.0147019	2.20291	1
793	Pennsylvania	36	2	-1.38095	-0.778328	-0.513994	-0.0286032	0.0147019	-1.79709	0
794	Pennsylvania	36	2	-1.38095	-0.778328	-0.513994	-0.0286032	0.0147019	2.20291	1
796	Pennsylvania	36	3	-1.38095	-0.778328	-0.513994	-0.0286032	0.0147019	-1.79709	0
914	Pennsylvania	36	3	-1.38095	-0.778328	-0.513994	-0.0286032	0.0147019	1.20291	0
915	Pennsylvania	36	3	-1.38095	-0.778328	-0.513994	-0.0286032	0.0147019	-1.79709	1
916	Pennsylvania	36	2	-1.38095	-0.778328	-0.513994	-0.0286032	0.0147019	-1.79709	1
920	Pennsylvania	36	2	-1.38095	-0.778328	-0.513994	-0.0286032	0.0147019	2.20291	1
922	Pennsylvania	36	2	-1.38095	-0.778328	-0.513994	-0.0286032	0.0147019	1.20291	1
924	Pennsylvania	36	2	-1.38095	-0.778328	-0.513994	-0.0286032	0.0147019	-1.79709	1
929	Pennsylvania	36	1	-1.38095	-0.778328	-0.513994	-0.0286032	0.0147019	2.20291	1
931	Pennsylvania	36	3	-1.38095	-0.778328	-0.513994	-0.0286032	0.0147019	-1.79709	1
934	Pennsylvania	36	3	-1.38095	-0.778328	-0.513994	-0.0286032	0.0147019	2.20291	1
936	Pennsylvania	36	2	-1.38095	-0.778328	-0.513994	-0.0286032	0.0147019	0.202913	0
939	Pennsylvania	36	2	-1.38095	-0.778328	-0.513994	-0.0286032	0.0147019	-2.79709	1
775.201	Pennsylvania	36	2	-1.38095	-0.778328	-0.513994	-0.0286032	0.0147019	-1.79709	0
440.201	Pennsylvania	36	3	-1.38095	-0.778328	-0.513994	-0.0286032	0.0147019	-2.79709	0
515.201	Pennsylvania	36	2	-1.38095	-0.778328	-0.513994	-0.0286032	0.0147019	-2.79709	0
716.201	Pennsylvania	36	3	-1.38095	-0.778328	-0.513994	-0.0286032	0.0147019	-1.79709	1
594.201	Pennsylvania	36	1	-1.38095	-0.778328	-0.513994	-0.0286032	0.0147019	-1.79709	1
647.201	Pennsylvania	36	1	-1.38095	-0.778328	-0.513994	-0.0286032	0.0147019	-1.79709	1
704.201	Pennsylvania	36	3	-1.38095	-0.778328	-0.513994	-0.0286032	0.0147019	-1.79709	1
712.201	Pennsylvania	36	2	-1.38095	-0.778328	-0.513994	-0.0286032	0.0147019	-1.79709	0
785.201	Pennsylvania	36	1	-1.38095	-0.778328	-0.513994	-0.0286032	0.0147019	-1.79709	1
472.201	Pennsylvania	36	2	-1.38095	-0.778328	-0.513994	-0.0286032	0.0147019	-1.79709	0
623.201	Pennsylvania	36	2	-1.38095	-0.778328	-0.513994	-0.0286032	0.0147019	-1.79709	0
706.201	Pennsylvania	36	3	-1.38095	-0.778328	-0.513994	-0.0286032	0.0147019	-1.79709	1
726.201	Pennsylvania	36		-1.38095	-0.778328	-0.513994	-0.0286032	0.0147019	-1.79709	1
487.201	Pennsylvania	36	3	-1.38095	-0.778328	-0.513994	-0.0286032	0.0147019	-1.79709	1
543.201	Pennsylvania	36	1	-1.38095	-0.778328	-0.513994	-0.0286032	0.0147019	-1.79709	1
677.201	Pennsylvania	36	1	-1.38095	-0.778328	-0.513994	-0.0286032	0.0147019	-1.79709	1
738.201	Pennsylvania	36	2	-1.38095	-0.778328	-0.513994	-0.0286032	0.0147019	-1.79709	1
771.201	Pennsylvania	36	3	-1.38095	-0.778328	-0.513994	-0.0286032	0.0147019	-1.79709	1
450.201	Pennsylvania	36	3	-1.38095	-0.778328	-0.513994	-0.0286032	0.0147019	-1.79709	1
553.201	Pennsylvania	36	3	-1.38095	-0.778328	-0.513994	-0.0286032	0.0147019	-1.79709	1
599.201	Pennsylvania	36	3	-1.38095	-0.778328	-0.513994	-0.0286032	0.0147019	-3.79709	1
601.201	Pennsylvania	36	3	-1.38095	-0.778328	-0.513994	-0.0286032	0.0147019	-1.79709	1
659.201	Pennsylvania	36	2	-1.38095	-0.778328	-0.513994	-0.0286032	0.0147019	-1.79709	1
742.201	Pennsylvania	36	3	-1.38095	-0.778328	-0.513994	-0.0286032	0.0147019	-1.79709	0
765.201	Pennsylvania	36	2	-1.38095	-0.778328	-0.513994	-0.0286032	0.0147019	-1.79709	1
485.201	Pennsylvania	36	2	-1.38095	-0.778328	-0.513994	-0.0286032	0.0147019	0.202913	1
682.201	Pennsylvania	36	2	-1.38095	-0.778328	-0.513994	-0.0286032	0.0147019	0.202913	0
777.201	Pennsylvania	36	3	-1.38095	-0.778328	-0.513994	-0.0286032	0.0147019	0.202913	0
458.201	Pennsylvania	36		-1.38095	-0.778328	-0.513994	-0.0286032	0.0147019	0.202913	1
561.201	Pennsylvania	36	3	-1.38095	-0.778328	-0.513994	-0.0286032	0.0147019	0.202913	1
436.201	Pennsylvania	36	2	-1.38095	-0.778328	-0.513994	-0.0286032	0.0147019	0.202913	0
739.201	Pennsylvania	36	3	-1.38095	-0.778328	-0.513994	-0.0286032	0.0147019	0.202913	1
444.201	Pennsylvania	36	2	-1.38095	-0.778328	-0.513994	-0.0286032	0.0147019	0.202913	1
548.201	Pennsylvania	36	3	-1.38095	-0.778328	-0.513994	-0.0286032	0.0147019	0.202913	0
660.201	Pennsylvania	36	3	-1.38095	-0.778328	-0.513994	-0.0286032	0.0147019	0.202913	0
743.201	Pennsylvania	36	3	-1.38095	-0.778328	-0.513994	-0.0286032	0.0147019	0.202913	1
616.201	Pennsylvania	36	2	-1.38095	-0.778328	-0.513994	-0.0286032	0.0147019	1.20291	0
502.201	Pennsylvania	36	1	-1.38095	-0.778328	-0.513994	-0.0286032	0.0147019	1.20291	1
582.201	Pennsylvania	36	1	-1.38095	-0.778328	-0.513994	-0.0286032	0.0147019	1.20291	1
437.201	Pennsylvania	36	2	-1.38095	-0.778328	-0.513994	-0.0286032	0.0147019	1.20291	1
438.201	Pennsylvania	36	2	-1.38095	-0.778328	-0.513994	-0.0286032	0.0147019	1.20291	1
516.201	Pennsylvania	36	3	-1.38095	-0.778328	-0.513994	-0.0286032	0.0147019	1.20291	1
591.201	Pennsylvania	36	2	-1.38095	-0.778328	-0.513994	-0.0286032	0.0147019	2.20291	1
463.201	Pennsylvania	36	2	-1.38095	-0.778328	-0.513994	-0.0286032	0.0147019	2.20291	1
725.201	Pennsylvania	36	2	-1.38095	-0.778328	-0.513994	-0.0286032	0.0147019	2.20291	1
657.201	Pennsylvania	36	3	-1.38095	-0.778328	-0.513994	-0.0286032	0.0147019	2.20291	0
763.201	Pennsylvania	36	2	-1.38095	-0.778328	-0.513994	-0.0286032	0.0147019	2.20291	1
776.201	Pennsylvania	36	2	-1.38095	-0.778328	-0.513994	-0.0286032	0.0147019	2.20291	1
184	Rhode Island	37	3	0.0942843	-0.980273	1.03626	0.390938	0.405112	-0.797087	1
378	Rhode Island	37	2	0.0942843	-0.980273	1.03626	0.390938	0.405112	2.20291	0
768	Rhode Island	37		0.0942843	-0.980273	1.03626	0.390938	0.405112	1.20291	1
769	Rhode Island	37	3	0.0942843	-0.980273	1.03626	0.390938	0.405112	0.202913	0
772	Rhode Island	37	3	0.0942843	-0.980273	1.03626	0.390938	0.405112	0.202913	0
774	Rhode Island	37	2	0.0942843	-0.980273	1.03626	0.390938	0.405112	1.20291	1
777	Rhode Island	37	3	0.0942843	-0.980273	1.03626	0.390938	0.405112	0.202913	1
539.201	Rhode Island	37	2	0.0942843	-0.980273	1.03626	0.390938	0.405112	-1.79709	0
496.201	Rhode Island	37	3	0.0942843	-0.980273	1.03626	0.390938	0.405112	0.202913	0
579.201	Rhode Island	37	2	0.0942843	-0.980273	1.03626	0.390938	0.405112	1.20291	0
5	South Carolina	38	2	-0.0561519	1.03917	-0.741364	-1.02921	0.76302	-1.79709	0
11	South Carolina	38	3	-0.0561519	1.03917	-0.741364	-1.02921	0.76302	0.202913	1
158	South Carolina	38	3	-0.0561519	1.03917	-0.741364	-1.02921	0.76302	-1.79709	0
589	South Carolina	38	2	-0.0561519	1.03917	-0.741364	-1.02921	0.76302	1.20291	0
728	South Carolina	38	3	-0.0561519	1.03917	-0.741364	-1.02921	0.76302	-1.79709	0
828	South Carolina	38	2	-0.0561519	1.03917	-0.741364	-1.02921	0.76302	2.20291	1
692.201	South Carolina	38	3	-0.0561519	1.03917	-0.741364	-1.02921	0.76302	-1.79709	1
580.201	South Carolina	38	3	-0.0561519	1.03917	-0.741364	-1.02921	0.76302	-1.79709	1
524.201	South Carolina	38	3	-0.0561519	1.03917	-0.741364	-1.02921	0.76302	0.202913	1
525.201	South Carolina	38		-0.0561519	1.03917	-0.741364	-1.02921	0.76302	0.202913	1
462.201	South Carolina	38	2	-0.0561519	1.03917	-0.741364	-1.02921	0.76302	1.20291	1
169	South Dakota	39	3	0.994497	-0.273467	1.40832	-0.241512	-0.340125	0.202913	0
424	South Dakota	39	3	0.994497	-0.273467	1.40832	-0.241512	-0.340125	-1.79709	0
642	South Dakota	39		0.994497	-0.273467	1.40832	-0.241512	-0.340125	1.20291	1
662	South Dakota	39	3	0.994497	-0.273467	1.40832	-0.241512	-0.340125	0.202913	1
726	South Dakota	39	2	0.994497	-0.273467	1.40832	-0.241512	-0.340125	1.20291	1
831.201	South Dakota	39	2	0.994497	-0.273467	1.40832	-0.241512	-0.340125	-1.79709	0
52.2006	South Dakota	39	3	0.994497	-0.273467	1.40832	-0.241512	-0.340125	-1.79709	1
308.201	South Dakota	39	3	0.994497	-0.273467	1.40832	-0.241512	-0.340125	0.202913	0
799.201	South Dakota	39	3	0.994497	-0.273467	1.40832	-0.241512	-0.340125	1.20291	0
301.201	South Dakota	39	3	0.994497	-0.273467	1.40832	-0.241512	-0.340125	2.20291	1
118	Tennessee	40	2	1.16898	1.64501	-0.265954	-0.673505	0.179121	-0.797087	0
407	Tennessee	40	2	1.16898	1.64501	-0.265954	-0.673505	0.179121	-2.79709	0
543	Tennessee	40	1	1.16898	1.64501	-0.265954	-0.673505	0.179121	-1.79709	0
557	Tennessee	40	3	1.16898	1.64501	-0.265954	-0.673505	0.179121	-1.79709	1
558	Tennessee	40	3	1.16898	1.64501	-0.265954	-0.673505	0.179121	-1.79709	1
561	Tennessee	40	3	1.16898	1.64501	-0.265954	-0.673505	0.179121	0.202913	1
563	Tennessee	40	3	1.16898	1.64501	-0.265954	-0.673505	0.179121	-1.79709	1
652	Tennessee	40	2	1.16898	1.64501	-0.265954	-0.673505	0.179121	1.20291	1
739	Tennessee	40	3	1.16898	1.64501	-0.265954	-0.673505	0.179121	-2.79709	0
852	Tennessee	40	2	1.16898	1.64501	-0.265954	-0.673505	0.179121	2.20291	1
854	Tennessee	40	2	1.16898	1.64501	-0.265954	-0.673505	0.179121	1.20291	0
428.201	Tennessee	40	3	1.16898	1.64501	-0.265954	-0.673505	0.179121	-1.79709	1
566.201	Tennessee	40	2	1.16898	1.64501	-0.265954	-0.673505	0.179121	-1.79709	1
255.201	Tennessee	40	3	1.16898	1.64501	-0.265954	-0.673505	0.179121	-1.79709	1
279.201	Tennessee	40	3	1.16898	1.64501	-0.265954	-0.673505	0.179121	-1.79709	1
209.201	Tennessee	40	3	1.16898	1.64501	-0.265954	-0.673505	0.179121	-1.79709	0
401.201	Tennessee	40	2	1.16898	1.64501	-0.265954	-0.673505	0.179121	-1.79709	0
467.201	Tennessee	40	3	1.16898	1.64501	-0.265954	-0.673505	0.179121	-3.79709	0
309.201	Tennessee	40	3	1.16898	1.64501	-0.265954	-0.673505	0.179121	0.202913	1
403.201	Tennessee	40	2	1.16898	1.64501	-0.265954	-0.673505	0.179121	0.202913	0
736.201	Tennessee	40	3	1.16898	1.64501	-0.265954	-0.673505	0.179121	0.202913	1
139.201	Tennessee	40	1	1.16898	1.64501	-0.265954	-0.673505	0.179121	0.202913	1
673.201	Tennessee	40	3	1.16898	1.64501	-0.265954	-0.673505	0.179121	0.202913	1
473.201	Tennessee	40	3	1.16898	1.64501	-0.265954	-0.673505	0.179121	0.202913	0
701.201	Tennessee	40	2	1.16898	1.64501	-0.265954	-0.673505	0.179121	0.202913	1
83.2006	Tennessee	40	3	1.16898	1.64501	-0.265954	-0.673505	0.179121	0.202913	1
228.201	Tennessee	40	3	1.16898	1.64501	-0.265954	-0.673505	0.179121	0.202913	1
238.201	Tennessee	40	3	1.16898	1.64501	-0.265954	-0.673505	0.179121	0.202913	1
225.201	Tennessee	40	3	1.16898	1.64501	-0.265954	-0.673505	0.179121	1.20291	1
324.201	Tennessee	40	2	1.16898	1.64501	-0.265954	-0.673505	0.179121	1.20291	1
105.201	Tennessee	40	2	1.16898	1.64501	-0.265954	-0.673505	0.179121	1.20291	1
254.201	Tennessee	40		1.16898	1.64501	-0.265954	-0.673505	0.179121	1.20291	1
287.201	Tennessee	40	3	1.16898	1.64501	-0.265954	-0.673505	0.179121	1.20291	1
697.201	Tennessee	40	2	1.16898	1.64501	-0.265954	-0.673505	0.179121	2.20291	0
126.201	Tennessee	40	2	1.16898	1.64501	-0.265954	-0.673505	0.179121	2.20291	1
252.201	Tennessee	40	3	1.16898	1.64501	-0.265954	-0.673505	0.179121	2.20291	1
13	Texas	41	3	0.867842	0.534312	-0.190164	-0.174802	0.0332411	-2.79709	0
14	Texas	41	2	0.867842	0.534312	-0.190164	-0.174802	0.0332411	1.20291	1
108	Texas	41	3	0.867842	0.534312	-0.190164	-0.174802	0.0332411	0.202913	1
114	Texas	41	3	0.867842	0.534312	-0.190164	-0.174802	0.0332411	1.20291	1
117	Texas	41	1	0.867842	0.534312	-0.190164	-0.174802	0.0332411	0.202913	1
122	Texas	41	3	0.867842	0.534312	-0.190164	-0.174802	0.0332411	-1.79709	1
123	Texas	41		0.867842	0.534312	-0.190164	-0.174802	0.0332411	1.20291	0
124	Texas	41		0.867842	0.534312	-0.190164	-0.174802	0.0332411	1.20291	0
215	Texas	41	3	0.867842	0.534312	-0.190164	-0.174802	0.0332411	2.20291	0
219	Texas	41	2	0.867842	0.534312	-0.190164	-0.174802	0.0332411	1.20291	1
220	Texas	41	2	0.867842	0.534312	-0.190164	-0.174802	0.0332411	2.20291	1
222	Texas	41	3	0.867842	0.534312	-0.190164	-0.174802	0.0332411	-1.79709	1
230	Texas	41	2	0.867842	0.534312	-0.190164	-0.174802	0.0332411	2.20291	1
334	Texas	41	3	0.867842	0.534312	-0.190164	-0.174802	0.0332411	-1.79709	0
335	Texas	41	2	0.867842	0.534312	-0.190164	-0.174802	0.0332411	-1.79709	1
339	Texas	41	3	0.867842	0.534312	-0.190164	-0.174802	0.0332411	0.202913	0
345	Texas	41	3	0.867842	0.534312	-0.190164	-0.174802	0.0332411	0.202913	0
346	Texas	41	3	0.867842	0.534312	-0.190164	-0.174802	0.0332411	2.20291	0
389	Texas	41	3	0.867842	0.534312	-0.190164	-0.174802	0.0332411	0.202913	1
391	Texas	41	2	0.867842	0.534312	-0.190164	-0.174802	0.0332411	2.20291	1
399	Texas	41	2	0.867842	0.534312	-0.190164	-0.174802	0.0332411	0.202913	0
471	Texas	41	2	0.867842	0.534312	-0.190164	-0.174802	0.0332411	0.202913	1
477	Texas	41	3	0.867842	0.534312	-0.190164	-0.174802	0.0332411	-1.79709	1
481	Texas	41	3	0.867842	0.534312	-0.190164	-0.174802	0.0332411	2.20291	1
487	Texas	41	3	0.867842	0.534312	-0.190164	-0.174802	0.0332411	-1.79709	1
490	Texas	41	3	0.867842	0.534312	-0.190164	-0.174802	0.0332411	1.20291	0
491	Texas	41	3	0.867842	0.534312	-0.190164	-0.174802	0.0332411	-1.79709	0
499	Texas	41	3	0.867842	0.534312	-0.190164	-0.174802	0.0332411	-1.79709	0
503	Texas	41	2	0.867842	0.534312	-0.190164	-0.174802	0.0332411	2.20291	0
505	Texas	41	2	0.867842	0.534312	-0.190164	-0.174802	0.0332411	2.20291	1
507	Texas	41	2	0.867842	0.534312	-0.190164	-0.174802	0.0332411	1.20291	0
508	Texas	41	3	0.867842	0.534312	-0.190164	-0.174802	0.0332411	-1.79709	1
521	Texas	41	1	0.867842	0.534312	-0.190164	-0.174802	0.0332411	-3.79709	1
613	Texas	41	2	0.867842	0.534312	-0.190164	-0.174802	0.0332411	1.20291	0
615	Texas	41	2	0.867842	0.534312	-0.190164	-0.174802	0.0332411	0.202913	1
631	Texas	41	2	0.867842	0.534312	-0.190164	-0.174802	0.0332411	0.202913	1
654	Texas	41	3	0.867842	0.534312	-0.190164	-0.174802	0.0332411	1.20291	1
659	Texas	41		0.867842	0.534312	-0.190164	-0.174802	0.0332411	1.20291	0
748	Texas	41	3	0.867842	0.534312	-0.190164	-0.174802	0.0332411	0.202913	1
751	Texas	41		0.867842	0.534312	-0.190164	-0.174802	0.0332411	-1.79709	1
753	Texas	41	2	0.867842	0.534312	-0.190164	-0.174802	0.0332411	-0.797087	0
755	Texas	41	3	0.867842	0.534312	-0.190164	-0.174802	0.0332411	-3.79709	1
862	Texas	41	3	0.867842	0.534312	-0.190164	-0.174802	0.0332411	1.20291	0
864	Texas	41		0.867842	0.534312	-0.190164	-0.174802	0.0332411	1.20291	1
866	Texas	41	2	0.867842	0.534312	-0.190164	-0.174802	0.0332411	-1.79709	1
869	Texas	41	3	0.867842	0.534312	-0.190164	-0.174802	0.0332411	1.20291	0
871	Texas	41	2	0.867842	0.534312	-0.190164	-0.174802	0.0332411	2.20291	1
874	Texas	41	2	0.867842	0.534312	-0.190164	-0.174802	0.0332411	2.20291	1
996	Texas	41	3	0.867842	0.534312	-0.190164	-0.174802	0.0332411	-1.79709	0
999	Texas	41	3	0.867842	0.534312	-0.190164	-0.174802	0.0332411	0.202913	1
104.201	Texas	41	3	0.867842	0.534312	-0.190164	-0.174802	0.0332411	-1.79709	1
250.201	Texas	41	2	0.867842	0.534312	-0.190164	-0.174802	0.0332411	-1.79709	1
392.201	Texas	41	1	0.867842	0.534312	-0.190164	-0.174802	0.0332411	-2.79709	0
236.201	Texas	41	3	0.867842	0.534312	-0.190164	-0.174802	0.0332411	-1.79709	0
333.201	Texas	41	1	0.867842	0.534312	-0.190164	-0.174802	0.0332411	-2.79709	0
35.2006	Texas	41	2	0.867842	0.534312	-0.190164	-0.174802	0.0332411	-1.79709	0
193.201	Texas	41	2	0.867842	0.534312	-0.190164	-0.174802	0.0332411	-1.79709	1
219.201	Texas	41	2	0.867842	0.534312	-0.190164	-0.174802	0.0332411	-1.79709	1
382.201	Texas	41	2	0.867842	0.534312	-0.190164	-0.174802	0.0332411	-1.79709	0
412.201	Texas	41	3	0.867842	0.534312	-0.190164	-0.174802	0.0332411	-1.79709	1
93.2006	Texas	41	2	0.867842	0.534312	-0.190164	-0.174802	0.0332411	-1.79709	1
106.201	Texas	41	3	0.867842	0.534312	-0.190164	-0.174802	0.0332411	-1.79709	1
364.201	Texas	41	3	0.867842	0.534312	-0.190164	-0.174802	0.0332411	-1.79709	1
132.201	Texas	41	2	0.867842	0.534312	-0.190164	-0.174802	0.0332411	-1.79709	1
312.201	Texas	41	3	0.867842	0.534312	-0.190164	-0.174802	0.0332411	-1.79709	1
340.201	Texas	41	2	0.867842	0.534312	-0.190164	-0.174802	0.0332411	-1.79709	1
350.201	Texas	41	3	0.867842	0.534312	-0.190164	-0.174802	0.0332411	-1.79709	1
396.201	Texas	41	3	0.867842	0.534312	-0.190164	-0.174802	0.0332411	-1.79709	1
811.201	Texas	41	3	0.867842	0.534312	-0.190164	-0.174802	0.0332411	-1.79709	1
377.201	Texas	41	3	0.867842	0.534312	-0.190164	-0.174802	0.0332411	0.202913	1
43.2006	Texas	41	3	0.867842	0.534312	-0.190164	-0.174802	0.0332411	0.202913	1
155.201	Texas	41	2	0.867842	0.534312	-0.190164	-0.174802	0.0332411	-0.797087	1
264.201	Texas	41	2	0.867842	0.534312	-0.190164	-0.174802	0.0332411	0.202913	0
72.2006	Texas	41	3	0.867842	0.534312	-0.190164	-0.174802	0.0332411	0.202913	1
163.201	Texas	41	3	0.867842	0.534312	-0.190164	-0.174802	0.0332411	0.202913	1
290.201	Texas	41	2	0.867842	0.534312	-0.190164	-0.174802	0.0332411	0.202913	0
354.201	Texas	41	2	0.867842	0.534312	-0.190164	-0.174802	0.0332411	0.202913	0
399.201	Texas	41	2	0.867842	0.534312	-0.190164	-0.174802	0.0332411	0.202913	0
424.201	Texas	41	2	0.867842	0.534312	-0.190164	-0.174802	0.0332411	0.202913	1
73.2006	Texas	41	2	0.867842	0.534312	-0.190164	-0.174802	0.0332411	0.202913	0
129.201	Texas	41	2	0.867842	0.534312	-0.190164	-0.174802	0.0332411	0.202913	0
179.201	Texas	41	3	0.867842	0.534312	-0.190164	-0.174802	0.0332411	0.202913	1
286.201	Texas	41	3	0.867842	0.534312	-0.190164	-0.174802	0.0332411	0.202913	1
331.201	Texas	41	2	0.867842	0.534312	-0.190164	-0.174802	0.0332411	0.202913	1
307.201	Texas	41	1	0.867842	0.534312	-0.190164	-0.174802	0.0332411	0.202913	0
109.201	Texas	41	2	0.867842	0.534312	-0.190164	-0.174802	0.0332411	1.20291	0
320.201	Texas	41	3	0.867842	0.534312	-0.190164	-0.174802	0.0332411	1.20291	1
387.201	Texas	41	2	0.867842	0.534312	-0.190164	-0.174802	0.0332411	1.20291	1
17.2006	Texas	41	2	0.867842	0.534312	-0.190164	-0.174802	0.0332411	1.20291	1
36.2006	Texas	41	3	0.867842	0.534312	-0.190164	-0.174802	0.0332411	1.20291	1
77.2006	Texas	41	3	0.867842	0.534312	-0.190164	-0.174802	0.0332411	1.20291	1
400.201	Texas	41	1	0.867842	0.534312	-0.190164	-0.174802	0.0332411	1.20291	0
41.2006	Texas	41	2	0.867842	0.534312	-0.190164	-0.174802	0.0332411	1.20291	1
81.2006	Texas	41	1	0.867842	0.534312	-0.190164	-0.174802	0.0332411	1.20291	1
133.201	Texas	41	3	0.867842	0.534312	-0.190164	-0.174802	0.0332411	1.20291	1
206.201	Texas	41	2	0.867842	0.534312	-0.190164	-0.174802	0.0332411	1.20291	0
267.201	Texas	41	2	0.867842	0.534312	-0.190164	-0.174802	0.0332411	1.20291	1
273.201	Texas	41	1	0.867842	0.534312	-0.190164	-0.174802	0.0332411	1.20291	1
274.201	Texas	41	1	0.867842	0.534312	-0.190164	-0.174802	0.0332411	1.20291	1
394.201	Texas	41	3	0.867842	0.534312	-0.190164	-0.174802	0.0332411	1.20291	1
417.201	Texas	41	2	0.867842	0.534312	-0.190164	-0.174802	0.0332411	1.20291	1
422.201	Texas	41	3	0.867842	0.534312	-0.190164	-0.174802	0.0332411	1.20291	0
29.2006	Texas	41	2	0.867842	0.534312	-0.190164	-0.174802	0.0332411	1.20291	0
130.201	Texas	41	3	0.867842	0.534312	-0.190164	-0.174802	0.0332411	1.20291	0
203.201	Texas	41	3	0.867842	0.534312	-0.190164	-0.174802	0.0332411	1.20291	0
302.201	Texas	41	3	0.867842	0.534312	-0.190164	-0.174802	0.0332411	1.20291	0
419.201	Texas	41	3	0.867842	0.534312	-0.190164	-0.174802	0.0332411	1.20291	1
82.2006	Texas	41	1	0.867842	0.534312	-0.190164	-0.174802	0.0332411	1.20291	1
205.201	Texas	41	2	0.867842	0.534312	-0.190164	-0.174802	0.0332411	1.20291	1
408.201	Texas	41	3	0.867842	0.534312	-0.190164	-0.174802	0.0332411	1.20291	1
229.201	Texas	41	2	0.867842	0.534312	-0.190164	-0.174802	0.0332411	2.20291	0
390.201	Texas	41		0.867842	0.534312	-0.190164	-0.174802	0.0332411	2.20291	0
246.201	Texas	41	2	0.867842	0.534312	-0.190164	-0.174802	0.0332411	2.20291	1
86.2006	Texas	41	2	0.867842	0.534312	-0.190164	-0.174802	0.0332411	2.20291	1
269.201	Texas	41	3	0.867842	0.534312	-0.190164	-0.174802	0.0332411	2.20291	1
407.201	Texas	41	2	0.867842	0.534312	-0.190164	-0.174802	0.0332411	2.20291	0
351.201	Texas	41	2	0.867842	0.534312	-0.190164	-0.174802	0.0332411	2.20291	0
46	Utah	42	2	0.139976	-0.273467	0.622856	-0.128563	-0.0800762	1.20291	1
350	Utah	42	3	0.139976	-0.273467	0.622856	-0.128563	-0.0800762	0.202913	0
352	Utah	42	3	0.139976	-0.273467	0.622856	-0.128563	-0.0800762	1.20291	1
354	Utah	42	2	0.139976	-0.273467	0.622856	-0.128563	-0.0800762	-1.79709	0
358	Utah	42	2	0.139976	-0.273467	0.622856	-0.128563	-0.0800762	2.20291	1
410	Utah	42	2	0.139976	-0.273467	0.622856	-0.128563	-0.0800762	-2.79709	1
539	Utah	42	3	0.139976	-0.273467	0.622856	-0.128563	-0.0800762	0.202913	1
542	Utah	42	3	0.139976	-0.273467	0.622856	-0.128563	-0.0800762	0.202913	1
549	Utah	42	2	0.139976	-0.273467	0.622856	-0.128563	-0.0800762	2.20291	1
879	Utah	42	2	0.139976	-0.273467	0.622856	-0.128563	-0.0800762	0.202913	0
787.201	Utah	42	2	0.139976	-0.273467	0.622856	-0.128563	-0.0800762	-1.79709	1
815.201	Utah	42	3	0.139976	-0.273467	0.622856	-0.128563	-0.0800762	-1.79709	1
844.201	Utah	42	3	0.139976	-0.273467	0.622856	-0.128563	-0.0800762	-2.79709	0
846.201	Utah	42	1	0.139976	-0.273467	0.622856	-0.128563	-0.0800762	-1.79709	0
843.201	Utah	42	3	0.139976	-0.273467	0.622856	-0.128563	-0.0800762	-1.79709	1
797.201	Utah	42	2	0.139976	-0.273467	0.622856	-0.128563	-0.0800762	0.202913	0
792.201	Utah	42		0.139976	-0.273467	0.622856	-0.128563	-0.0800762	0.202913	1
832.201	Utah	42	3	0.139976	-0.273467	0.622856	-0.128563	-0.0800762	0.202913	1
851.201	Utah	42	3	0.139976	-0.273467	0.622856	-0.128563	-0.0800762	1.20291	0
825.201	Utah	42	3	0.139976	-0.273467	0.622856	-0.128563	-0.0800762	1.20291	1
840.201	Utah	42	2	0.139976	-0.273467	0.622856	-0.128563	-0.0800762	1.20291	0
788.201	Utah	42	2	0.139976	-0.273467	0.622856	-0.128563	-0.0800762	1.20291	0
859.201	Utah	42	2	0.139976	-0.273467	0.622856	-0.128563	-0.0800762	1.20291	0
7	Vermont	44	3	0.363894	-0.879301	0.705536	-0.0258411	-0.0182318	0.202913	1
595	Vermont	44	3	0.363894	-0.879301	0.705536	-0.0258411	-0.0182318	0.202913	0
609	Vermont	44	2	0.363894	-0.879301	0.705536	-0.0258411	-0.0182318	2.20291	0
619	Vermont	44	2	0.363894	-0.879301	0.705536	-0.0258411	-0.0182318	0.202913	1
598.201	Vermont	44	1	0.363894	-0.879301	0.705536	-0.0258411	-0.0182318	0.202913	0
672.201	Vermont	44	2	0.363894	-0.879301	0.705536	-0.0258411	-0.0182318	1.20291	0
99	Virginia	43	1	-0.62984	-0.374439	-0.596674	0.963058	-0.574631	-1.79709	1
105	Virginia	43	2	-0.62984	-0.374439	-0.596674	0.963058	-0.574631	0.202913	1
137	Virginia	43	2	-0.62984	-0.374439	-0.596674	0.963058	-0.574631	-1.79709	1
149	Virginia	43	3	-0.62984	-0.374439	-0.596674	0.963058	-0.574631	0.202913	1
272	Virginia	43	2	-0.62984	-0.374439	-0.596674	0.963058	-0.574631	0.202913	0
278	Virginia	43	3	-0.62984	-0.374439	-0.596674	0.963058	-0.574631	-1.79709	1
284	Virginia	43	3	-0.62984	-0.374439	-0.596674	0.963058	-0.574631	-1.79709	1
370	Virginia	43	2	-0.62984	-0.374439	-0.596674	0.963058	-0.574631	-1.79709	0
375	Virginia	43	3	-0.62984	-0.374439	-0.596674	0.963058	-0.574631	0.202913	0
581	Virginia	43	2	-0.62984	-0.374439	-0.596674	0.963058	-0.574631	1.20291	0
635	Virginia	43	3	-0.62984	-0.374439	-0.596674	0.963058	-0.574631	1.20291	1
734	Virginia	43	3	-0.62984	-0.374439	-0.596674	0.963058	-0.574631	-1.79709	0
826	Virginia	43	3	-0.62984	-0.374439	-0.596674	0.963058	-0.574631	-1.79709	0
846	Virginia	43	3	-0.62984	-0.374439	-0.596674	0.963058	-0.574631	-1.79709	0
847	Virginia	43	3	-0.62984	-0.374439	-0.596674	0.963058	-0.574631	1.20291	1
972	Virginia	43	2	-0.62984	-0.374439	-0.596674	0.963058	-0.574631	-1.79709	0
978	Virginia	43	3	-0.62984	-0.374439	-0.596674	0.963058	-0.574631	1.20291	0
981	Virginia	43	2	-0.62984	-0.374439	-0.596674	0.963058	-0.574631	1.20291	1
986	Virginia	43	3	-0.62984	-0.374439	-0.596674	0.963058	-0.574631	1.20291	1
993	Virginia	43	3	-0.62984	-0.374439	-0.596674	0.963058	-0.574631	-1.79709	0
571.201	Virginia	43	3	-0.62984	-0.374439	-0.596674	0.963058	-0.574631	-1.79709	0
741.201	Virginia	43	2	-0.62984	-0.374439	-0.596674	0.963058	-0.574631	0.202913	0
521.201	Virginia	43	3	-0.62984	-0.374439	-0.596674	0.963058	-0.574631	0.202913	1
477.201	Virginia	43	2	-0.62984	-0.374439	-0.596674	0.963058	-0.574631	-0.797087	0
519.201	Virginia	43	2	-0.62984	-0.374439	-0.596674	0.963058	-0.574631	0.202913	1
644.201	Virginia	43	2	-0.62984	-0.374439	-0.596674	0.963058	-0.574631	0.202913	1
675.201	Virginia	43	3	-0.62984	-0.374439	-0.596674	0.963058	-0.574631	1.20291	0
722.201	Virginia	43	3	-0.62984	-0.374439	-0.596674	0.963058	-0.574631	2.20291	0
61	Washington	45	3	1.08481	-0.475411	0.250796	0.659436	0.165384	-1.79709	1
72	Washington	45	3	1.08481	-0.475411	0.250796	0.659436	0.165384	1.20291	0
237	Washington	45	2	1.08481	-0.475411	0.250796	0.659436	0.165384	0.202913	1
238	Washington	45	3	1.08481	-0.475411	0.250796	0.659436	0.165384	0.202913	1
246	Washington	45	3	1.08481	-0.475411	0.250796	0.659436	0.165384	1.20291	1
248	Washington	45	3	1.08481	-0.475411	0.250796	0.659436	0.165384	-0.797087	1
252	Washington	45	1	1.08481	-0.475411	0.250796	0.659436	0.165384	0.202913	1
258	Washington	45	1	1.08481	-0.475411	0.250796	0.659436	0.165384	1.20291	1
259	Washington	45	3	1.08481	-0.475411	0.250796	0.659436	0.165384	1.20291	0
373	Washington	45	3	1.08481	-0.475411	0.250796	0.659436	0.165384	-1.79709	1
450	Washington	45	3	1.08481	-0.475411	0.250796	0.659436	0.165384	0.202913	1
472	Washington	45	2	1.08481	-0.475411	0.250796	0.659436	0.165384	1.20291	0
475	Washington	45	2	1.08481	-0.475411	0.250796	0.659436	0.165384	1.20291	0
479	Washington	45	2	1.08481	-0.475411	0.250796	0.659436	0.165384	-2.79709	0
480	Washington	45	2	1.08481	-0.475411	0.250796	0.659436	0.165384	0.202913	0
483	Washington	45	2	1.08481	-0.475411	0.250796	0.659436	0.165384	0.202913	1
517	Washington	45	2	1.08481	-0.475411	0.250796	0.659436	0.165384	1.20291	1
522	Washington	45	2	1.08481	-0.475411	0.250796	0.659436	0.165384	1.20291	1
526	Washington	45	3	1.08481	-0.475411	0.250796	0.659436	0.165384	1.20291	1
528	Washington	45	2	1.08481	-0.475411	0.250796	0.659436	0.165384	1.20291	0
534	Washington	45	1	1.08481	-0.475411	0.250796	0.659436	0.165384	0.202913	0
560	Washington	45	2	1.08481	-0.475411	0.250796	0.659436	0.165384	0.202913	0
562	Washington	45	1	1.08481	-0.475411	0.250796	0.659436	0.165384	0.202913	1
596	Washington	45	3	1.08481	-0.475411	0.250796	0.659436	0.165384	0.202913	0
602	Washington	45	3	1.08481	-0.475411	0.250796	0.659436	0.165384	1.20291	0
626	Washington	45	2	1.08481	-0.475411	0.250796	0.659436	0.165384	1.20291	1
655	Washington	45	2	1.08481	-0.475411	0.250796	0.659436	0.165384	0.202913	0
661	Washington	45	3	1.08481	-0.475411	0.250796	0.659436	0.165384	-1.79709	0
766	Washington	45	2	1.08481	-0.475411	0.250796	0.659436	0.165384	2.20291	1
896	Washington	45	2	1.08481	-0.475411	0.250796	0.659436	0.165384	0.202913	0
900	Washington	45	2	1.08481	-0.475411	0.250796	0.659436	0.165384	1.20291	0
906	Washington	45	2	1.08481	-0.475411	0.250796	0.659436	0.165384	0.202913	1
909	Washington	45	3	1.08481	-0.475411	0.250796	0.659436	0.165384	-1.79709	1
912	Washington	45	3	1.08481	-0.475411	0.250796	0.659436	0.165384	1.20291	0
1001	Washington	45	3	1.08481	-0.475411	0.250796	0.659436	0.165384	0.202913	0
1003	Washington	45	2	1.08481	-0.475411	0.250796	0.659436	0.165384	0.202913	1
957.201	Washington	45	2	1.08481	-0.475411	0.250796	0.659436	0.165384	-1.79709	0
980.201	Washington	45	1	1.08481	-0.475411	0.250796	0.659436	0.165384	-1.79709	1
944.201	Washington	45	2	1.08481	-0.475411	0.250796	0.659436	0.165384	0.202913	1
912.201	Washington	45	2	1.08481	-0.475411	0.250796	0.659436	0.165384	0.202913	0
970.201	Washington	45		1.08481	-0.475411	0.250796	0.659436	0.165384	0.202913	0
900.201	Washington	45	3	1.08481	-0.475411	0.250796	0.659436	0.165384	0.202913	0
950.201	Washington	45	2	1.08481	-0.475411	0.250796	0.659436	0.165384	-0.797087	0
977.201	Washington	45	3	1.08481	-0.475411	0.250796	0.659436	0.165384	0.202913	1
1001.2	Washington	45	3	1.08481	-0.475411	0.250796	0.659436	0.165384	0.202913	1
895.201	Washington	45	3	1.08481	-0.475411	0.250796	0.659436	0.165384	1.20291	0
976.201	Washington	45	3	1.08481	-0.475411	0.250796	0.659436	0.165384	1.20291	1
983.201	Washington	45	3	1.08481	-0.475411	0.250796	0.659436	0.165384	1.20291	1
883.201	Washington	45	2	1.08481	-0.475411	0.250796	0.659436	0.165384	1.20291	1
894.201	Washington	45	1	1.08481	-0.475411	0.250796	0.659436	0.165384	1.20291	1
998.201	Washington	45	2	1.08481	-0.475411	0.250796	0.659436	0.165384	1.20291	1
891.201	Washington	45	1	1.08481	-0.475411	0.250796	0.659436	0.165384	1.20291	0
949.201	Washington	45	2	1.08481	-0.475411	0.250796	0.659436	0.165384	2.20291	1
989.201	Washington	45	2	1.08481	-0.475411	0.250796	0.659436	0.165384	2.20291	0
86	West Virginia	47	2	-0.0505406	1.54404	0.044096	-1.52279	-0.0671491	2.20291	0
273	West Virginia	47	2	-0.0505406	1.54404	0.044096	-1.52279	-0.0671491	1.20291	1
394	West Virginia	47	1	-0.0505406	1.54404	0.044096	-1.52279	-0.0671491	-0.797087	0
398	West Virginia	47	3	-0.0505406	1.54404	0.044096	-1.52279	-0.0671491	-1.79709	0
432	West Virginia	47	3	-0.0505406	1.54404	0.044096	-1.52279	-0.0671491	-1.79709	1
784.201	West Virginia	47	3	-0.0505406	1.54404	0.044096	-1.52279	-0.0671491	-1.79709	1
565.201	West Virginia	47	2	-0.0505406	1.54404	0.044096	-1.52279	-0.0671491	-2.79709	0
636.201	West Virginia	47	2	-0.0505406	1.54404	0.044096	-1.52279	-0.0671491	-1.79709	1
666.201	West Virginia	47	3	-0.0505406	1.54404	0.044096	-1.52279	-0.0671491	0.202913	1
634.201	West Virginia	47	2	-0.0505406	1.54404	0.044096	-1.52279	-0.0671491	0.202913	0
651.201	West Virginia	47	3	-0.0505406	1.54404	0.044096	-1.52279	-0.0671491	0.202913	1
584.201	West Virginia	47	2	-0.0505406	1.54404	0.044096	-1.52279	-0.0671491	1.20291	1
606.201	West Virginia	47	1	-0.0505406	1.54404	0.044096	-1.52279	-0.0671491	2.20291	1
64	Wisconsin	46	2	-0.0350428	-0.879301	0.333476	-0.0399219	-0.013313	1.20291	1
127	Wisconsin	46	2	-0.0350428	-0.879301	0.333476	-0.0399219	-0.013313	1.20291	1
131	Wisconsin	46	2	-0.0350428	-0.879301	0.333476	-0.0399219	-0.013313	0.202913	0
134	Wisconsin	46	2	-0.0350428	-0.879301	0.333476	-0.0399219	-0.013313	1.20291	1
138	Wisconsin	46	3	-0.0350428	-0.879301	0.333476	-0.0399219	-0.013313	-1.79709	0
292	Wisconsin	46	3	-0.0350428	-0.879301	0.333476	-0.0399219	-0.013313	0.202913	1
293	Wisconsin	46	3	-0.0350428	-0.879301	0.333476	-0.0399219	-0.013313	1.20291	1
299	Wisconsin	46	3	-0.0350428	-0.879301	0.333476	-0.0399219	-0.013313	-1.79709	1
423	Wisconsin	46	2	-0.0350428	-0.879301	0.333476	-0.0399219	-0.013313	-1.79709	1
591	Wisconsin	46	2	-0.0350428	-0.879301	0.333476	-0.0399219	-0.013313	2.20291	0
660	Wisconsin	46	1	-0.0350428	-0.879301	0.333476	-0.0399219	-0.013313	2.20291	0
672	Wisconsin	46	3	-0.0350428	-0.879301	0.333476	-0.0399219	-0.013313	2.20291	1
690	Wisconsin	46	2	-0.0350428	-0.879301	0.333476	-0.0399219	-0.013313	-1.79709	0
702	Wisconsin	46	3	-0.0350428	-0.879301	0.333476	-0.0399219	-0.013313	-1.79709	1
704	Wisconsin	46	3	-0.0350428	-0.879301	0.333476	-0.0399219	-0.013313	0.202913	1
809	Wisconsin	46	3	-0.0350428	-0.879301	0.333476	-0.0399219	-0.013313	2.20291	1
817	Wisconsin	46	2	-0.0350428	-0.879301	0.333476	-0.0399219	-0.013313	-1.79709	0
956	Wisconsin	46	1	-0.0350428	-0.879301	0.333476	-0.0399219	-0.013313	1.20291	0
964	Wisconsin	46	3	-0.0350428	-0.879301	0.333476	-0.0399219	-0.013313	-1.79709	1
969	Wisconsin	46	3	-0.0350428	-0.879301	0.333476	-0.0399219	-0.013313	0.202913	0
67.2006	Wisconsin	46		-0.0350428	-0.879301	0.333476	-0.0399219	-0.013313	-1.79709	0
102.201	Wisconsin	46	3	-0.0350428	-0.879301	0.333476	-0.0399219	-0.013313	-1.79709	1
33.2006	Wisconsin	46	2	-0.0350428	-0.879301	0.333476	-0.0399219	-0.013313	-1.79709	0
294.201	Wisconsin	46	2	-0.0350428	-0.879301	0.333476	-0.0399219	-0.013313	-1.79709	0
363.201	Wisconsin	46	3	-0.0350428	-0.879301	0.333476	-0.0399219	-0.013313	-1.79709	0
366.201	Wisconsin	46		-0.0350428	-0.879301	0.333476	-0.0399219	-0.013313	-1.79709	0
147.201	Wisconsin	46	2	-0.0350428	-0.879301	0.333476	-0.0399219	-0.013313	-1.79709	1
275.201	Wisconsin	46	2	-0.0350428	-0.879301	0.333476	-0.0399219	-0.013313	-1.79709	1
388.201	Wisconsin	46	1	-0.0350428	-0.879301	0.333476	-0.0399219	-0.013313	-1.79709	1
18.2006	Wisconsin	46	2	-0.0350428	-0.879301	0.333476	-0.0399219	-0.013313	-2.79709	1
22.2006	Wisconsin	46		-0.0350428	-0.879301	0.333476	-0.0399219	-0.013313	-3.79709	0
292.201	Wisconsin	46	3	-0.0350428	-0.879301	0.333476	-0.0399219	-0.013313	-2.79709	0
323.201	Wisconsin	46	2	-0.0350428	-0.879301	0.333476	-0.0399219	-0.013313	-1.79709	0
352.201	Wisconsin	46	2	-0.0350428	-0.879301	0.333476	-0.0399219	-0.013313	-1.79709	1
357.201	Wisconsin	46	2	-0.0350428	-0.879301	0.333476	-0.0399219	-0.013313	-3.79709	1
186.201	Wisconsin	46	2	-0.0350428	-0.879301	0.333476	-0.0399219	-0.013313	0.202913	0
299.201	Wisconsin	46	2	-0.0350428	-0.879301	0.333476	-0.0399219	-0.013313	0.202913	1
176.201	Wisconsin	46	2	-0.0350428	-0.879301	0.333476	-0.0399219	-0.013313	0.202913	1
305.201	Wisconsin	46	2	-0.0350428	-0.879301	0.333476	-0.0399219	-0.013313	0.202913	1
384.201	Wisconsin	46	2	-0.0350428	-0.879301	0.333476	-0.0399219	-0.013313	0.202913	0
241.201	Wisconsin	46	3	-0.0350428	-0.879301	0.333476	-0.0399219	-0.013313	0.202913	1
74.2006	Wisconsin	46	2	-0.0350428	-0.879301	0.333476	-0.0399219	-0.013313	0.202913	0
231.201	Wisconsin	46	2	-0.0350428	-0.879301	0.333476	-0.0399219	-0.013313	0.202913	1
244.201	Wisconsin	46	3	-0.0350428	-0.879301	0.333476	-0.0399219	-0.013313	0.202913	0
296.201	Wisconsin	46	2	-0.0350428	-0.879301	0.333476	-0.0399219	-0.013313	0.202913	0
369.201	Wisconsin	46	2	-0.0350428	-0.879301	0.333476	-0.0399219	-0.013313	0.202913	0
44.2006	Wisconsin	46	2	-0.0350428	-0.879301	0.333476	-0.0399219	-0.013313	1.20291	1
190.201	Wisconsin	46	2	-0.0350428	-0.879301	0.333476	-0.0399219	-0.013313	1.20291	0
55.2006	Wisconsin	46	2	-0.0350428	-0.879301	0.333476	-0.0399219	-0.013313	1.20291	1
99.2006	Wisconsin	46	2	-0.0350428	-0.879301	0.333476	-0.0399219	-0.013313	1.20291	0
178.201	Wisconsin	46	3	-0.0350428	-0.879301	0.333476	-0.0399219	-0.013313	1.20291	1
379.201	Wisconsin	46	2	-0.0350428	-0.879301	0.333476	-0.0399219	-0.013313	1.20291	0
346.201	Wisconsin	46	2	-0.0350428	-0.879301	0.333476	-0.0399219	-0.013313	1.20291	0
54.2006	Wisconsin	46	1	-0.0350428	-0.879301	0.333476	-0.0399219	-0.013313	2.20291	0
183.201	Wisconsin	46	3	-0.0350428	-0.879301	0.333476	-0.0399219	-0.013313	2.20291	0
208.201	Wisconsin	46	2	-0.0350428	-0.879301	0.333476	-0.0399219	-0.013313	2.20291	1
317.201	Wisconsin	46	2	-0.0350428	-0.879301	0.333476	-0.0399219	-0.013313	2.20291	1
334.201	Wisconsin	46	2	-0.0350428	-0.879301	0.333476	-0.0399219	-0.013313	2.20291	0
338.201	Wisconsin	46	2	-0.0350428	-0.879301	0.333476	-0.0399219	-0.013313	2.20291	0
271.201	Wisconsin	46	2	-0.0350428	-0.879301	0.333476	-0.0399219	-0.013313	2.20291	0
23.2006	Wisconsin	46		-0.0350428	-0.879301	0.333476	-0.0399219	-0.013313	2.20291	1
817.201	Wyoming	48	2	0.912465	0.837229	1.03626	0.918227	0.951518	-1.79709	0
850.201	Wyoming	48	2	0.912465	0.837229	1.03626	0.918227	0.951518	2.20291	1
